# Supplementary material for: Ni pincer complex catalytic hydroboration of CO2: a DFT study on the influence of borane reductants on selective reduction
Source: Royal Society of Chemistry journal article supplement (doi:10.1039/d1nj01758f), 2021-01-01
Supplement: d1nj01758f1.pdf [file d1nj01758f1.pdf]

## Supplementary Information

### Ni pincer complex catalytic hydroboration of CO<sub>2</sub>: a DFT study on the influence of borane reductants on the selective reduction

Nana Ma\*, Qingli Xu, Chenhao Tu, Wenyue Guo and Guisheng Zhang\*

School of Chemistry and Chemical Engineering, Henan Key laboratory of Organic Functional Molecule and Drug Innovation; Key Laboratory of Green Chemical Media and Reactions, Ministry of Education; Henan Normal University, Xinxiang, Henan, 453007, China.

E-mail: mann076@htu.edu.cn; zgs6668@yahoo.com

## Content

|                                                            |          |
|------------------------------------------------------------|----------|
| All visualized structures.....                             | S2-S7    |
| Calculated energies and imaginary frequencies .....        | S8-S10   |
| Cartesian coordinates of all the optimized structures..... | S11-S119 |

## All visualized structures

All visualized optimized intermediates and transition states, along with key bond lengths needed to understand structural changes (Å)

### HBcat

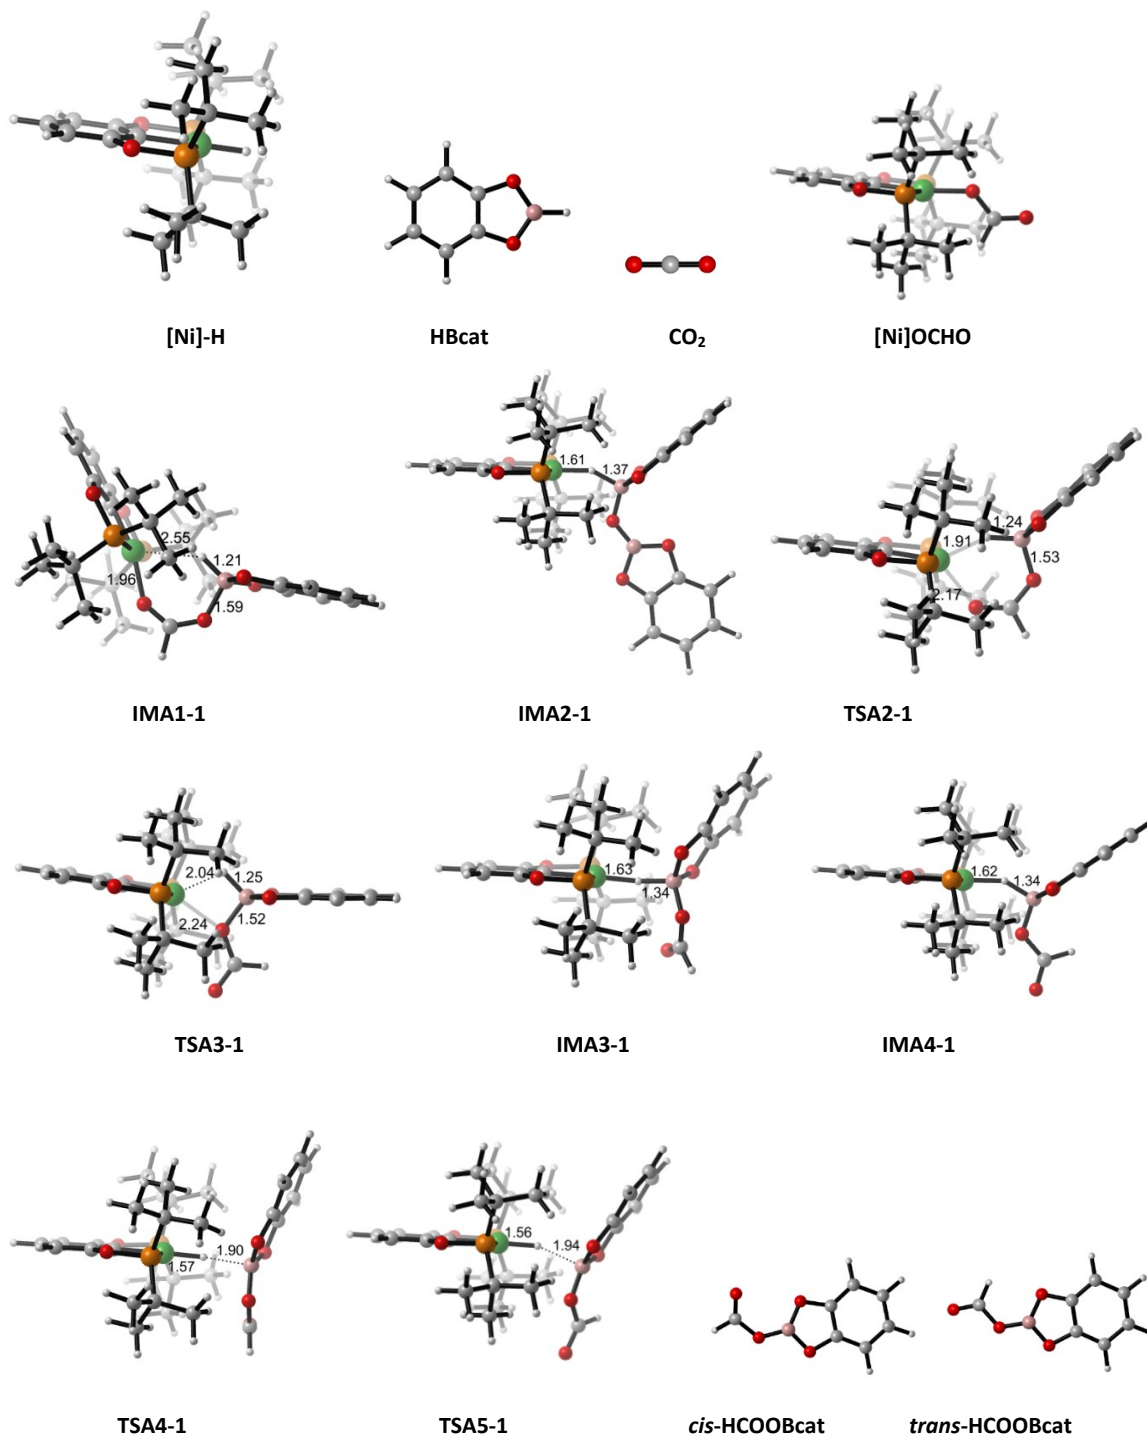

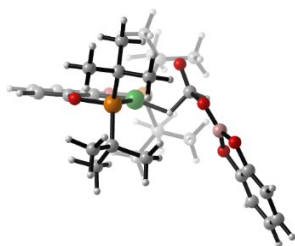

**TSB1-1**

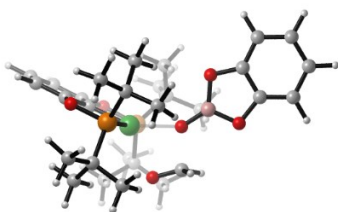

**TSB2-1**

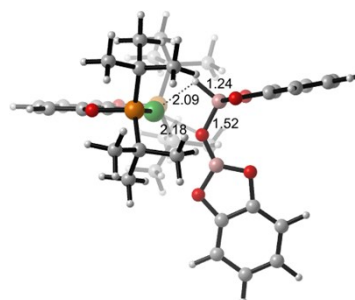

**TSB3-1**

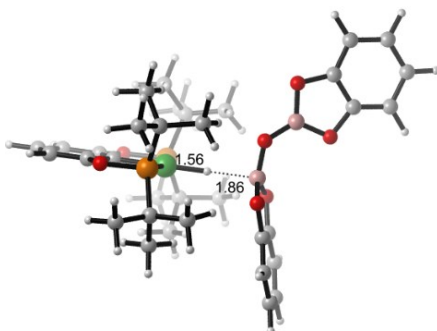

**TSB4-1**

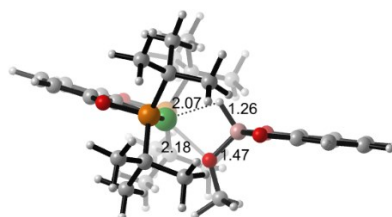

**TSC1**

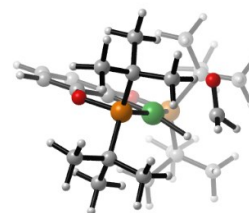

**TSC2-1**

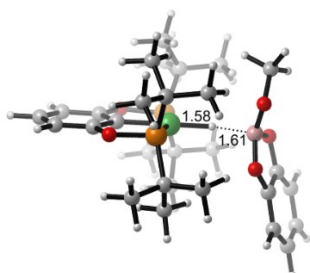

**TSC3-1**

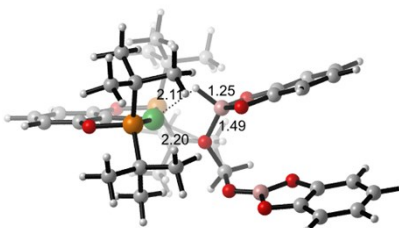

**TSD1-1**

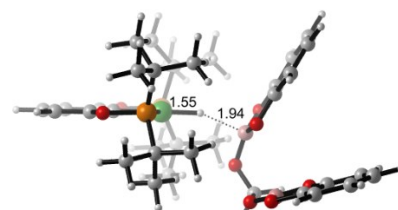

**TSD2-1**

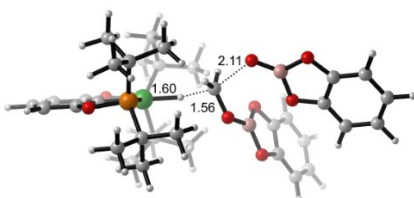

**TSE1-1**

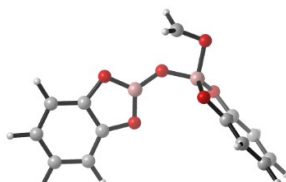

**TSF1-1**

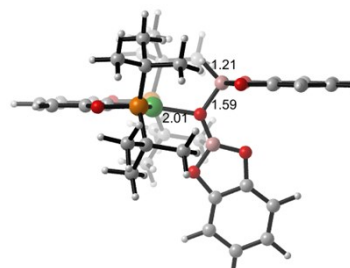

**IMB1-1**

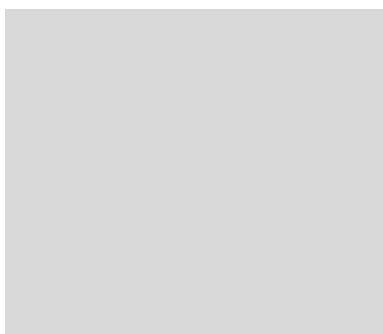

**IMB2-1**

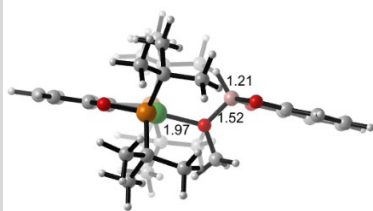

**IMC1-1**

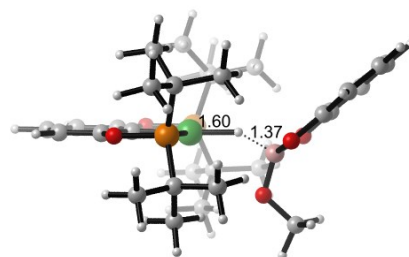

**IMC2-1**

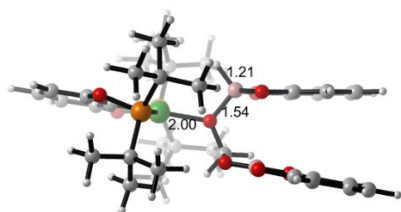

**[Ni]OCH2OBcat**

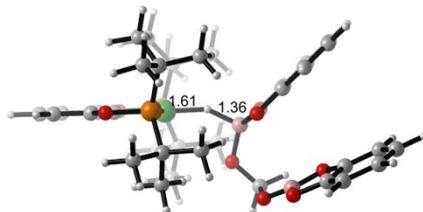

**[Ni]OCH3**

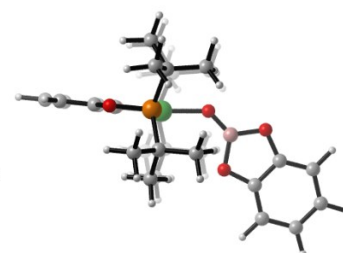

**catBOCH2OBcat**

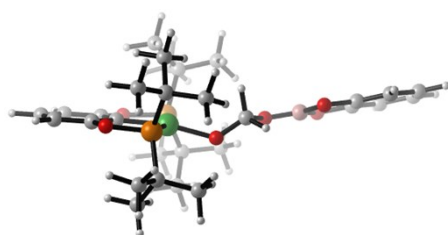

**IMD1-1**

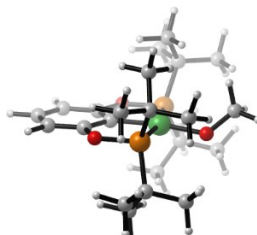

**IMD2-1**

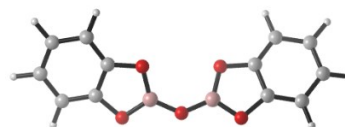

**[Ni]OBcat**

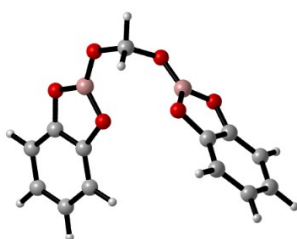

**catBOCH2OBcat**

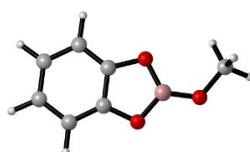

**CH3OBcat**

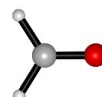

**CH2O**

9-BBN

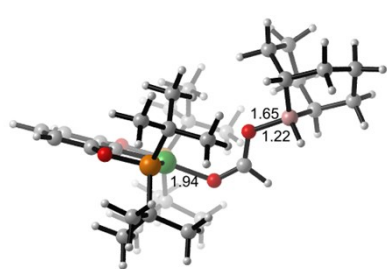

IMA1-2

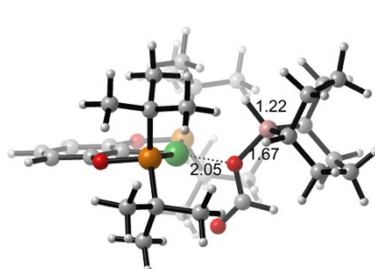

IMA2-2

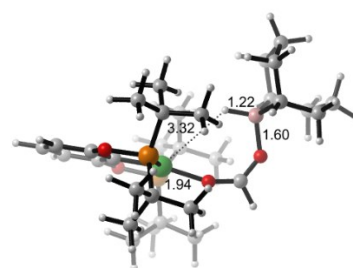

IMA3-2

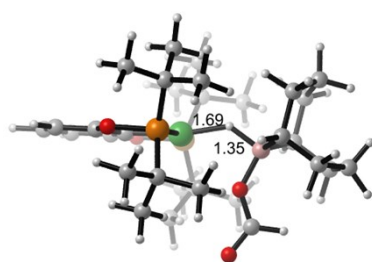

IMA4-2

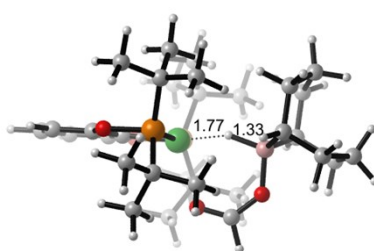

IMA5-2

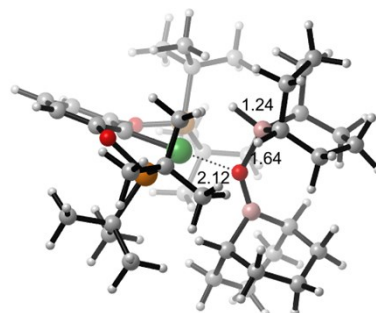

IMB1-2

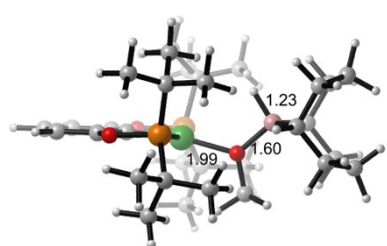

IMC1-2

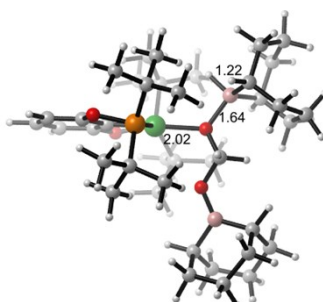

IMD1-2

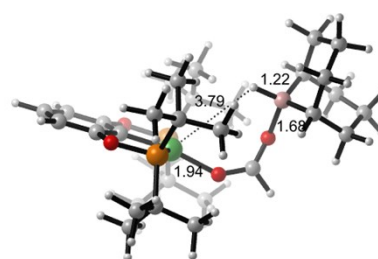

TSA2-2

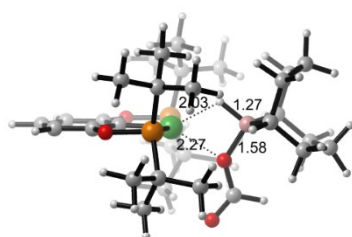

TSA3-2

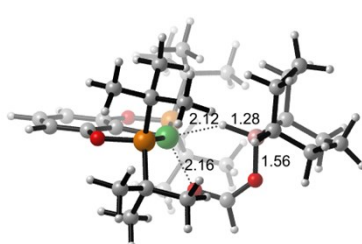

TSA4-2

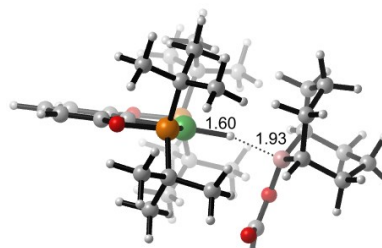

TSA5-2

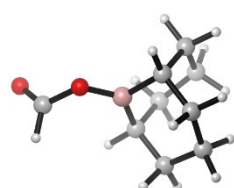

TSA6-2

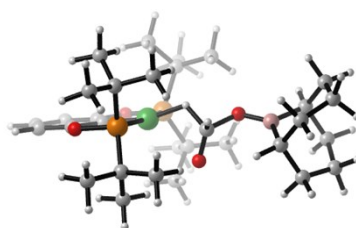

TSB1-2

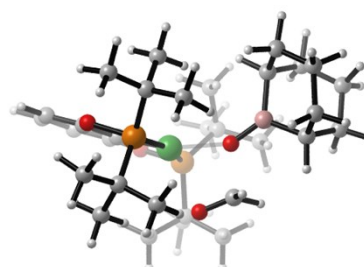

TSB2-2

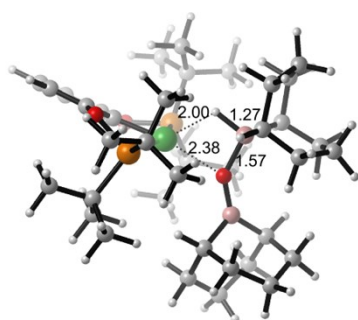

**TSB3-2**

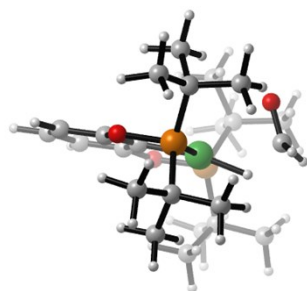

**TSC1-2**

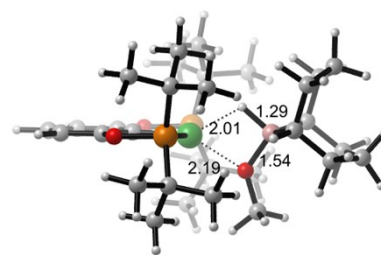

**TSC2-2**

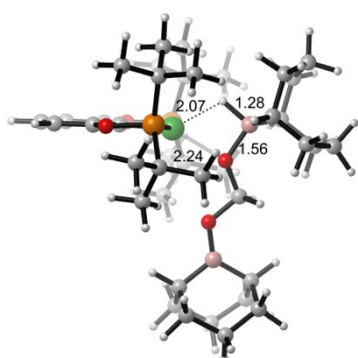

**TSD1-2**

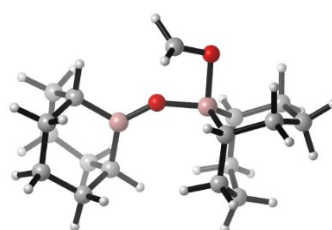

**TSF1-2**

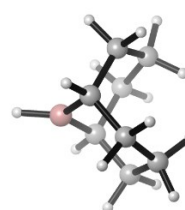

**TSC2-2**

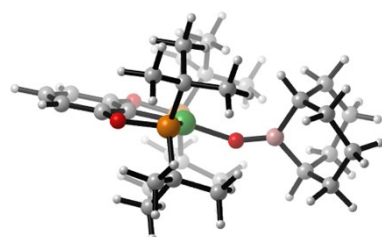

**[Ni]OBBN**

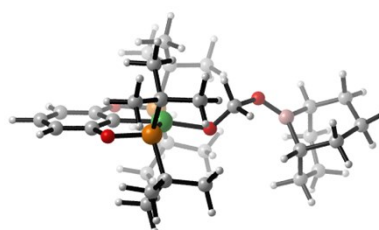

**[Ni]OCH2OBBN**

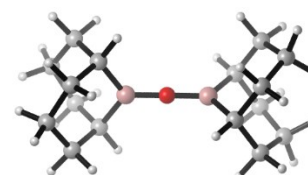

**BBNOBBN**

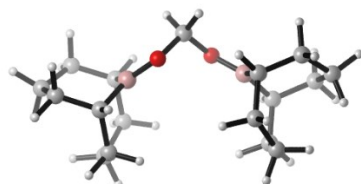

**BBNOCH2OBBN**

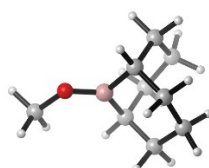

**CH<sub>3</sub>BBN**

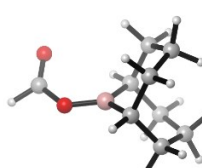

***cis*-HCOBBN**

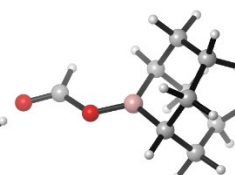

***trans*-HCOBBN**

HBPIn

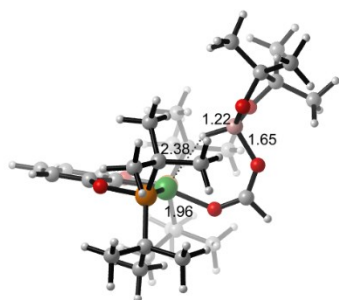

IMA1-3

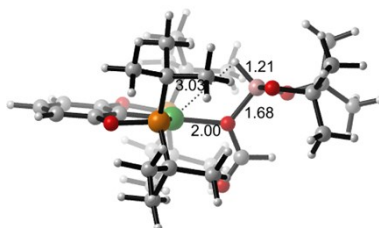

IMA2-3

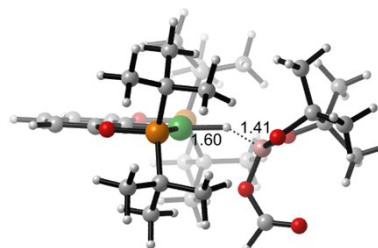

IMA3-3

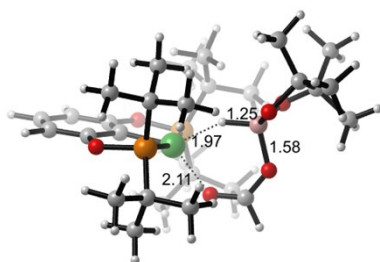

IMA4-3

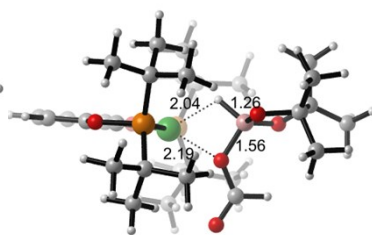

TSA2-3

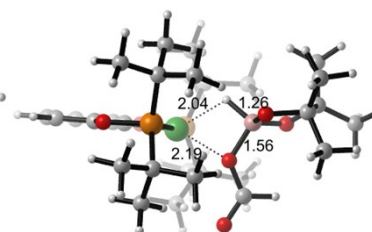

TSA3-3

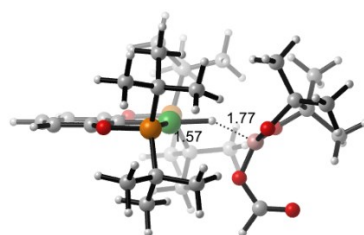

TSA4-3

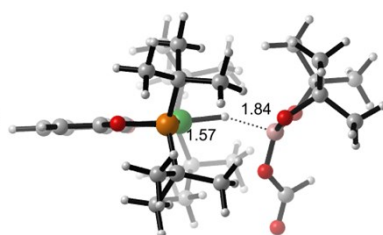

TSA5-3

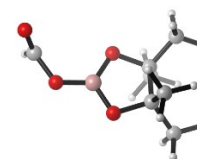

TSA6-3

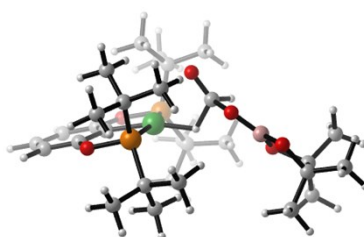

TSB1-3

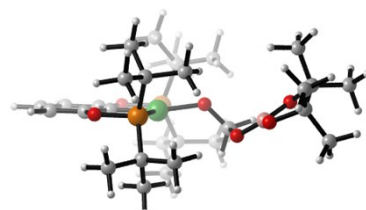

[Ni]OCH<sub>2</sub>OBcat

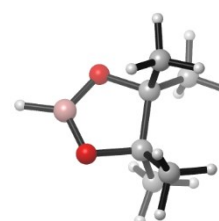

HBPIn

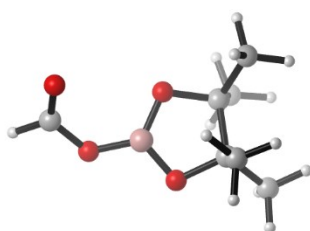

Cis-HCOOBcat

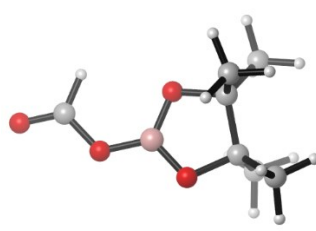

trans-HCOOBcat

### Calculated energies and imaginary frequencies

SCF energies (that is the single-point energies used for energy profiles) (in Hartrees) and thermal corrections at 298K obtained for all optimized structures and imaginary frequencies calculated for all transition states

| Compound       | Single-point energy | Thermal correction to Gibbs free energy | Gibbs free energy | Imaginary frequency |
|----------------|---------------------|-----------------------------------------|-------------------|---------------------|
| [Ni]-H         | -1867.133516        | 0.519756                                | -1866.61376       |                     |
| CO2            | -188.6485802        | -0.009781                               | -188.6583612      |                     |
| HBcat          | -407.1756435        | 0.072647                                | -407.1029965      |                     |
| TSA1           | -2055.775551        | 0.531536                                | -2055.244015      | -199.0615           |
| [Ni]OCHO       | -2055.810651        | 0.530784                                | -2055.279867      |                     |
| IMA1-1         | -2463.002287        | 0.627325                                | -2462.374962      |                     |
| IMA2-1         | -2463.004561        | 0.631848                                | -2462.372713      |                     |
| TSA2-1         | -2462.997908        | 0.630311                                | -2462.367597      | -70.2791            |
| TSA3-1         | -2462.996456        | 0.630004                                | -2462.366452      | -132.3554           |
| IMA3-1         | -2463.003037        | 0.627314                                | -2462.375723      |                     |
| IMA4-1         | -2463.008417        | 0.626574                                | -2462.381843      |                     |
| TSA4-1         | -2462.994004        | 0.626823                                | -2462.367181      | -138.6659           |
| TSA5-1         | -2462.997098        | 0.624492                                | -2462.372606      | -126.3525           |
| TSA6-1         | -595.8426913        | 0.082813                                | -595.7598783      | -127.6118           |
| cis-HCOOBcat   | -595.8468208        | 0.081634                                | -595.7651868      |                     |
| trans-HCOOBcat | -595.8474434        | 0.082421                                | -595.7650224      |                     |
| TSB1-1         | -2462.9734004       | 0.629483                                | -2462.343917      | -105.8864           |
| [Ni]OCH2OBcat  | -2463.015709        | 0.629953                                | -2462.385756      |                     |
| TSB2-1         | -2462.99759         | 0.629104                                | -2462.368486      | -233.8000           |
| [Ni]OBcat      | -2348.469958        | 0.600367                                | -2347.869591      |                     |
| HCHO           | -114.54595          | 0.005167                                | -114.540783       |                     |
| IMB1-1         | -2755.663272        | 0.699223                                | -2754.964049      |                     |
| TSB3-1         | -2755.657236        | 0.693532                                | -2754.963704      | -98.1044            |
| IMB2-1         | -2755.669645        | 0.69325                                 | -2754.976395      |                     |



|                                 |              |          |              |           |
|---------------------------------|--------------|----------|--------------|-----------|
| <b>TSB4-1</b>                   | -2755.659808 | 0.692358 | -2754.96745  | -116.0400 |
| <b>catBOBcat</b>                | -888.511802  | 0.149598 | -888.362204  |           |
| <b>IMD1-1</b>                   | -2870.226745 | 0.730144 | -2869.496601 |           |
| <b>TSD1-1</b>                   | -2870.220199 | 0.728446 | -2869.491753 | -121.6726 |
| <b>IMD2-1</b>                   | -2870.235849 | 0.72711  | -2869.508739 |           |
| <b>TSD2-1</b>                   | -2870.224512 | 0.724502 | -2869.50001  | -130.2758 |
| <b>catBOCH<sub>2</sub>OBcat</b> | -1003.078734 | 0.180425 | -1002.898309 |           |
| <b>TSF1-1</b>                   | -1003.023778 | 0.176286 | -1002.847492 | -337.6039 |
| <b>TSE1-1</b>                   | -2870.173778 | 0.719921 | -2869.453857 | -693.7380 |
| <b>TSC1</b>                     | -1981.672067 | 0.549426 | -1981.122641 | -117.8851 |
| <b>[Ni]OCH<sub>3</sub></b>      | -1981.723367 | 0.553107 | -1981.17026  |           |
| <b>IMC1-1</b>                   | -2388.941708 | 0.647932 | -2388.293776 |           |
| <b>TSC2-1</b>                   | -2388.934044 | 0.647362 | -2388.286682 | -152.9397 |
| <b>IMC2-1</b>                   | -2388.947209 | 0.647061 | -2388.300148 |           |
| <b>TSC3-1</b>                   | -2388.940545 | 0.645739 | -2388.294806 | -80.1861  |
| <b>CH<sub>3</sub>OBcat</b>      | -521.7997255 | 0.101541 | -521.6981845 |           |
| <b>9-BBN</b>                    | -338.8681757 | 0.187    | -338.6811757 |           |
| <b>IMA1-2</b>                   | -2394.719892 | 0.74739  | -2393.972502 |           |
| <b>IMA2-2</b>                   | -2394.703579 | 0.748985 | -2393.954594 |           |
| <b>TSA2-2</b>                   | -2394.703698 | 0.745677 | -2393.958021 | -137.0879 |
| <b>TSA3-2</b>                   | -2394.696447 | 0.749563 | -2393.946884 | -127.9229 |
| <b>IMA3-2</b>                   | -2394.71004  | 0.746694 | -2393.963346 |           |
| <b>IMA4-2</b>                   | -2394.702439 | 0.748341 | -2393.954098 |           |
| <b>TSA4-2</b>                   | -2394.700264 | 0.749381 | -2393.950883 | -74.0595  |
| <b>IMA5-2</b>                   | -2394.704551 | 0.749306 | -2393.955245 |           |
| <b>TSA5-2</b>                   | -2394.691286 | 0.744416 | -2393.94687  | -111.2537 |
| <b>cis-HCOBBN</b>               | -527.5565083 | 0.199034 | -527.3574743 |           |
| <b>TSA6-2</b>                   | -527.5541899 | 0.199072 | -527.3551179 | -103.3168 |
| <b>trans-HCOBBN</b>             | -527.5557568 | 0.198355 | -527.3574018 |           |

|                                 |              |          |              |           |
|---------------------------------|--------------|----------|--------------|-----------|
| <b>TSB1-2</b>                   | -2394.677899 | 0.745945 | -2393.931954 | -95.3960  |
| <b>[Ni]OCH<sub>2</sub>OBBN</b>  | -2394.723855 | 0.74757  | -2393.976285 |           |
| <b>TSB2-2</b>                   | -2394.691665 | 0.748267 | -2393.943398 | -182.9065 |
| <b>[Ni]OBBN</b>                 | -2280.159791 | 0.717839 | -2279.441952 |           |
| <b>IMB1-2</b>                   | -2619.031563 | 0.937815 | -2618.093748 |           |
| <b>TSB3-2</b>                   | -2619.027888 | 0.937626 | -2618.090262 | -97.3521  |
| <b>BBNOBBN</b>                  | -751.9225338 | 0.384301 | -751.5382328 |           |
| <b>IMD1-2</b>                   | -2733.623304 | 0.965313 | -2732.657991 |           |
| <b>TSD1-2</b>                   | -2733.615345 | 0.965334 | -2732.650011 | -122.7540 |
| <b>BBNOCH<sub>2</sub>OBBN</b>   | -866.4946807 | 0.413316 | -866.0813647 |           |
| <b>TSC1</b>                     | -1981.672067 | 0.549426 | -1981.122641 | -117.8851 |
| <b>[Ni]OCH<sub>3</sub></b>      | -1981.723367 | 0.553107 | -1981.17026  |           |
| <b>IMC1-2</b>                   | -2320.629528 | 0.765966 | -2319.863562 |           |
| <b>TSC2-2</b>                   | -2320.622284 | 0.767388 | -2319.854896 | -154.7477 |
| <b>CH<sub>3</sub>OBBN</b>       | -453.5052524 | 0.21815  | -453.2871024 |           |
| <b>TSF1-2</b>                   | -866.444936  | 0.412232 | -866.032704  | -330.5381 |
| <b>IMA1-3</b>                   | -2467.845447 | 0.714358 | -2467.131089 |           |
| <b>IMA2-3</b>                   | -2467.850064 | 0.715034 | -2467.13503  |           |
| <b>TSA2-3</b>                   | -2467.8458   | 0.715812 | -2467.129988 | -44.9407  |
| <b>TSA3-3</b>                   | -2467.840909 | 0.716    | -2467.124909 | -128.1928 |
| <b>IMA3-3</b>                   | -2467.842201 | 0.718352 | -2467.123849 |           |
| <b>IMA4-3</b>                   | -2467.852241 | 0.713822 | -2467.138419 |           |
| <b>TSA4-3</b>                   | -2467.846683 | 0.713769 | -2467.132914 | -134.7775 |
| <b>TSA5-3</b>                   | -2467.846025 | 0.7131   | -2467.132925 | -132.9905 |
| <b>TSA6-3</b>                   | -600.7026268 | 0.168726 | -600.5339008 | -131.7447 |
| <b>cis-HCOOBPin</b>             | -600.7064067 | 0.168144 | -600.5382627 |           |
| <b>trans-HCOOBPin</b>           | -600.7082641 | 0.168644 | -600.5396201 |           |
| <b>TSB1-3</b>                   | -2467.826696 | 0.716385 | -2467.110311 | -109.6747 |
| <b>[Ni]OCH<sub>2</sub>OBPIn</b> | -2467.873071 | 0.716758 | -2467.156313 |           |

## Cartesian coordinates of all the optimized structures

HBcat reductant

catBOBcat

|   | x           | y           | z           |
|---|-------------|-------------|-------------|
| H | 6.69128400  | 0.09658000  | 0.31462100  |
| C | 5.62332200  | 0.22052400  | 0.16148000  |
| C | 5.12911800  | 1.45664200  | -0.26800700 |
| C | 4.76913000  | -0.86719800 | 0.40013200  |
| C | 3.75707200  | 1.66355900  | -0.47926300 |
| H | 5.81974800  | 2.27631000  | -0.44273300 |
| C | 3.41990000  | -0.65021700 | 0.18853000  |
| H | 5.14054300  | -1.83046600 | 0.73316100  |
| C | 2.92683000  | 0.58388800  | -0.24064000 |
| H | 3.36169100  | 2.61732600  | -0.81200900 |
| O | 2.36718900  | -1.53243600 | 0.34301000  |
| O | 1.55175800  | 0.50445400  | -0.36606800 |
| B | 1.24077900  | -0.79956800 | -0.00171500 |
| O | -0.00000500 | -1.34532000 | 0.00004800  |
| H | -5.81980000 | 2.27625300  | 0.44275500  |
| C | -5.12914900 | 1.45660700  | 0.26800300  |
| C | -5.62331300 | 0.22050100  | -0.16155800 |
| C | -3.75710500 | 1.66355500  | 0.47924400  |
| C | -4.76910000 | -0.86720900 | -0.40018700 |
| H | -6.69126800 | 0.09654000  | -0.31473400 |
| C | -2.92684900 | 0.58389800  | 0.24062700  |
| H | -3.36174400 | 2.61731800  | 0.81202500  |
| C | -3.41987100 | -0.65023000 | -0.18854900 |
| H | -5.14049600 | -1.83047400 | -0.73325000 |
| O | -1.55178600 | 0.50447500  | 0.36614800  |
| O | -2.36716500 | -1.53239500 | -0.34304900 |
| B | -1.24074100 | -0.79953800 | 0.00183200  |

catBOCH<sub>2</sub>OBcat

|   | x           | y           | z           |
|---|-------------|-------------|-------------|
| H | 0.11451800  | 2.52258300  | 1.43623000  |
| C | -0.17328900 | 2.96316700  | 0.47639300  |
| O | -1.54198900 | 2.73714200  | 0.21938900  |
| O | 0.61621700  | 2.44018500  | -0.57017100 |
| C | 3.51521900  | -0.85464400 | 1.46660100  |
| C | 2.81487100  | -0.04167800 | 0.59499200  |
| C | 2.96126100  | -0.13977900 | -0.79108600 |
| C | 3.81759200  | -1.05676000 | -1.37240400 |
| C | 4.53518000  | -1.88906100 | -0.49859800 |
| C | 4.38760900  | -1.79068800 | 0.88837000  |
| H | 3.39241700  | -0.76858000 | 2.54108300  |
| H | 3.92341400  | -1.12424000 | -2.44994400 |
| H | 5.21908000  | -2.62427500 | -0.91237100 |
| H | 4.95862400  | -2.45033400 | 1.53510000  |
| O | 2.14265400  | 0.78691500  | -1.40619900 |
| O | 1.90179900  | 0.95512300  | 0.88577500  |
| B | 1.49855400  | 1.43425800  | -0.35950900 |
| H | -0.04159400 | 4.04623000  | 0.49203500  |
| C | -4.58004400 | -0.95438500 | -0.31416300 |
| C | -3.46519700 | -0.16346200 | -0.10397700 |
| C | -2.21508800 | -0.71386300 | 0.18746100  |
| C | -2.01539300 | -2.07827500 | 0.28230300  |
| C | -3.13976200 | -2.89174300 | 0.07065200  |

|   |             |             |             |
|---|-------------|-------------|-------------|
| C | -4.39233300 | -2.34232800 | -0.22056500 |
| H | -5.54666700 | -0.51701300 | -0.54022000 |
| H | -1.03808900 | -2.49175300 | 0.50771200  |
| H | -3.03077200 | -3.97033900 | 0.13453100  |
| H | -5.24075900 | -3.00147400 | -0.37903400 |
| O | -1.29598600 | 0.30928800  | 0.34687100  |
| O | -3.36615000 | 1.21415600  | -0.13572100 |
| B | -2.03181300 | 1.47728400  | 0.14339900  |

**CH<sub>3</sub>OBcat**

|   | x           | y           | z           |
|---|-------------|-------------|-------------|
| O | 2.79495300  | -0.54487700 | -0.00944500 |
| C | 3.72383400  | 0.53763700  | 0.00440800  |
| H | 3.25845500  | 1.47605000  | -0.31170500 |
| H | 4.12817400  | 0.65796800  | 1.01511700  |
| H | 4.54128400  | 0.28736900  | -0.67713900 |
| H | -3.73354100 | 1.58219500  | -0.00167000 |
| C | -2.86359200 | 0.93201000  | -0.00093900 |
| C | -1.58188400 | 1.50567000  | -0.00133200 |
| C | -3.04022000 | -0.45481800 | 0.00049400  |
| C | -0.51159500 | 0.63053800  | -0.00042700 |
| H | -1.43217800 | 2.58025500  | -0.00229800 |
| C | -1.94429600 | -1.33249600 | 0.00151400  |
| H | -4.04570400 | -0.86540500 | 0.00083100  |
| C | -0.68702100 | -0.75606200 | 0.00098100  |
| O | 0.84018500  | 0.91817700  | 0.00079200  |
| H | -2.06913000 | -2.41017400 | 0.00260600  |
| O | 0.54479500  | -1.37622800 | 0.00203400  |
| B | 1.46836200  | -0.33194300 | -0.00019600 |

**CO<sub>2</sub>**

|   | x          | y          | z           |
|---|------------|------------|-------------|
| O | 0.00000000 | 0.00000000 | -1.16916700 |
| C | 0.00000000 | 0.00000000 | 0.00000000  |
| O | 0.00000000 | 0.00000000 | 1.16916700  |

**HBcat**

|   | x           | y           | z           |
|---|-------------|-------------|-------------|
| C | -0.90096700 | 1.43279000  | -0.00002400 |
| C | 0.27152100  | 0.69727700  | -0.00007300 |
| C | 0.27157400  | -0.69739400 | -0.00012200 |
| C | -0.90103500 | -1.43278100 | -0.00009800 |
| C | -2.09665400 | -0.70009100 | 0.00004700  |
| C | -2.09664600 | 0.70016300  | 0.00007800  |
| H | -0.88827700 | 2.51749200  | -0.00002700 |
| H | -0.88838700 | -2.51748800 | -0.00009100 |
| H | -3.04297200 | -1.23291200 | 0.00013300  |
| H | -3.04293900 | 1.23302400  | 0.00017000  |
| O | 1.57917300  | -1.14682600 | 0.00008400  |
| O | 1.57916200  | 1.14677300  | -0.00004400 |
| B | 2.35425000  | 0.00005100  | 0.00012300  |
| H | 3.53789200  | 0.00027000  | 0.00002500  |

**cis-HBCOOBcat**

|   | x           | y           | z           |
|---|-------------|-------------|-------------|
| O | -3.47913000 | 1.12253400  | 0.41008500  |
| C | -3.53671000 | 0.00676900  | -0.02208800 |
| O | -2.48253600 | -0.83792800 | -0.21032000 |

|   |             |             |             |
|---|-------------|-------------|-------------|
| H | -4.46054400 | -0.51158900 | -0.31503100 |
| H | 4.35946000  | -0.67068000 | 0.20182200  |
| C | 3.33229200  | -0.32813000 | 0.11916800  |
| C | 3.07215100  | 1.04119600  | -0.00455400 |
| C | 2.29481800  | -1.27259700 | 0.13957800  |
| C | 1.76206600  | 1.53169300  | -0.11386300 |
| H | 3.90096800  | 1.74272000  | -0.01611000 |
| C | 1.00882400  | -0.77572600 | 0.03082100  |
| H | 2.48387900  | -2.33640600 | 0.23540500  |
| C | 0.74975200  | 0.59004200  | -0.09323400 |
| H | 1.54696100  | 2.59049500  | -0.20927800 |
| O | -0.18983700 | -1.46700600 | 0.02233000  |
| O | -0.61801500 | 0.78755400  | -0.18265200 |
| B | -1.15474600 | -0.48305000 | -0.10946500 |

**trans-HBCOObcat**

|   | x           | y           | z           |
|---|-------------|-------------|-------------|
| C | -1.06088400 | -0.75335300 | -0.00004700 |
| C | -0.87213100 | 0.62938800  | -0.00009800 |
| C | -1.93057900 | 1.51815100  | -0.00003000 |
| C | -3.21627500 | 0.95544300  | 0.00007100  |
| C | -3.40701600 | -0.43041400 | 0.00015400  |
| C | -2.32202600 | -1.32030200 | 0.00007000  |
| H | -1.76995200 | 2.59087700  | -0.00008600 |
| H | -4.08006000 | 1.61339400  | 0.00012700  |
| H | -4.41674600 | -0.82976000 | 0.00025800  |
| H | -2.45733500 | -2.39647200 | 0.00013400  |
| O | 0.48898800  | 0.90033000  | -0.00022300 |
| O | 0.17134700  | -1.38472200 | -0.00005100 |
| B | 1.08807900  | -0.35168400 | -0.00014300 |
| O | 2.43803800  | -0.58346300 | -0.00014300 |
| C | 3.36031100  | 0.43078600  | 0.00021500  |
| H | 2.90391800  | 1.43259400  | 0.00060700  |
| O | 4.53555000  | 0.21405300  | 0.00012600  |

**HCHO**

|   | x           | y           | z           |
|---|-------------|-------------|-------------|
| H | 0.00012500  | 1.12344100  | -0.93785100 |
| C | -0.00001800 | 0.52895400  | 0.00000000  |
| H | 0.00012500  | 1.12344100  | 0.93785100  |
| O | -0.00001800 | -0.67757500 | 0.00000000  |

**IMA1-1**

|   | x           | y           | z           |
|---|-------------|-------------|-------------|
| C | 3.81988900  | 1.21447000  | -2.53378600 |
| C | 2.80220400  | 1.18520100  | -1.57982900 |
| C | 2.23823400  | 0.00072900  | -1.08269000 |
| C | 2.80324000  | -1.18325200 | -1.57980600 |
| C | 3.82094200  | -1.21166500 | -2.53377000 |
| C | 4.31865400  | 0.00161300  | -3.01071300 |
| H | 4.20659800  | 2.16674900  | -2.88155800 |
| H | 4.20847600  | -2.16361600 | -2.88152400 |
| H | 5.10998500  | 0.00195600  | -3.75499300 |
| O | 2.34431000  | -2.39831900 | -1.09464300 |
| O | 2.34222200  | 2.39987100  | -1.09471700 |
| P | 1.14524700  | -2.25932200 | 0.06794200  |
| P | 1.14336000  | 2.25998800  | 0.06797400  |
| C | -0.17914700 | -3.35813800 | -0.74217400 |

|    |             |             |             |
|----|-------------|-------------|-------------|
| C  | 2.00079300  | -3.05460800 | 1.56735000  |
| C  | -0.18174800 | 3.35817700  | -0.74178600 |
| C  | 1.99835500  | 3.05561700  | 1.56749800  |
| H  | -1.40935500 | -0.00236100 | 3.47614700  |
| Ni | 0.88448500  | 0.00015600  | 0.25383200  |
| C  | 3.26279800  | -2.19911000 | 1.82554200  |
| H  | 3.01354900  | -1.15003400 | 2.01335800  |
| H  | 3.77548800  | -2.58733100 | 2.71469000  |
| H  | 3.96318300  | -2.23995400 | 0.98606600  |
| C  | 2.43924700  | -4.51180700 | 1.32877400  |
| H  | 3.09552500  | -4.82106800 | 2.15268900  |
| H  | 1.59027500  | -5.20038900 | 1.31578200  |
| H  | 2.99883400  | -4.62541600 | 0.39538200  |
| C  | 1.08546100  | -2.97426300 | 2.80611500  |
| H  | 1.63126700  | -3.36794900 | 3.67332100  |
| H  | 0.79687900  | -1.94364100 | 3.02688400  |
| H  | 0.17614100  | -3.57163100 | 2.69356400  |
| C  | 0.41668700  | -4.66384800 | -1.31228400 |
| H  | 0.70874200  | -5.37307900 | -0.53546100 |
| H  | -0.35565100 | -5.14869600 | -1.92245800 |
| H  | 1.28078100  | -4.47310500 | -1.95424000 |
| C  | -1.31619600 | -3.68488000 | 0.24336600  |
| H  | -2.10885000 | -4.21218500 | -0.30122200 |
| H  | -0.98001500 | -4.34482200 | 1.04993700  |
| H  | -1.78007200 | -2.79282800 | 0.67110000  |
| C  | -0.72733900 | -2.52852900 | -1.92658800 |
| H  | -1.23789100 | -1.62389500 | -1.59491200 |
| H  | 0.06794600  | -2.25467200 | -2.62829500 |
| H  | -1.45743000 | -3.14045000 | -2.47055200 |
| C  | -0.73002700 | 2.52829300  | -1.92595900 |
| H  | 0.06518100  | 2.25436300  | -2.62773000 |
| H  | -1.24046400 | 1.62370400  | -1.59401400 |
| H  | -1.46024300 | 3.14003300  | -2.46995900 |
| C  | -1.31856600 | 3.68441700  | 0.24418600  |
| H  | -2.11178000 | 4.21115900  | -0.30012700 |
| H  | -1.78169500 | 2.79213200  | 0.67225900  |
| H  | -0.98241600 | 4.34467600  | 1.05051200  |
| C  | 0.41333600  | 4.66410500  | -1.31218300 |
| H  | -0.35954700 | 5.14875900  | -1.92182200 |
| H  | 0.70569200  | 5.37338600  | -0.53552400 |
| H  | 1.27705500  | 4.47364700  | -1.95472500 |
| C  | 2.43536800  | 4.51334500  | 1.32958200  |
| H  | 3.09132200  | 4.82287100  | 2.15365800  |
| H  | 2.99490600  | 4.62785800  | 0.39626400  |
| H  | 1.58578800  | 5.20117500  | 1.31683800  |
| C  | 1.08316600  | 2.97372600  | 2.80627900  |
| H  | 1.62860600  | 3.36752100  | 3.67366800  |
| H  | 0.17321400  | 3.57019400  | 2.69406700  |
| H  | 0.79562000  | 1.94270500  | 3.02654900  |
| C  | 3.26128700  | 2.20134900  | 1.82523000  |
| H  | 3.01322100  | 1.15185800  | 2.01228500  |
| H  | 3.96169300  | 2.24353500  | 0.98583200  |
| H  | 3.77347600  | 2.58952900  | 2.71468100  |
| O  | -0.14537300 | -0.00064700 | 1.92538500  |
| C  | -1.31474600 | -0.00158800 | 2.37941300  |
| O  | -2.42731600 | -0.00178700 | 1.76999400  |
| C  | -5.93652400 | -1.42463600 | -0.45825600 |
| C  | -4.77038500 | -0.70380500 | -0.26479900 |

|   |             |             |             |
|---|-------------|-------------|-------------|
| C | -4.77048600 | 0.70142200  | -0.26430600 |
| C | -5.93673300 | 1.42221300  | -0.45726700 |
| C | -7.12669000 | 0.69611600  | -0.65430900 |
| C | -7.12658700 | -0.69857700 | -0.65479200 |
| H | -5.92532600 | -2.51056400 | -0.45683200 |
| H | -5.92570000 | 2.50814200  | -0.45509400 |
| H | -8.05807400 | 1.23506100  | -0.80702000 |
| H | -8.05789400 | -1.23755000 | -0.80787700 |
| O | -3.50349900 | 1.17333300  | -0.07318700 |
| O | -3.50332700 | -1.17567200 | -0.07401100 |
| B | -2.67974000 | -0.00119700 | 0.19624000  |
| H | -1.59608400 | -0.00092100 | -0.33561800 |

**IMA2-1**

|    | x           | y           | z           |
|----|-------------|-------------|-------------|
| Ni | 0.70003300  | -0.00009800 | 0.05050200  |
| P  | 1.01494800  | 2.27006500  | -0.00256300 |
| P  | 1.01371900  | -2.27041800 | -0.00245800 |
| O  | -1.30935900 | 0.00048500  | 0.25435100  |
| C  | 2.58862600  | -0.00061600 | -0.17972400 |
| O  | 2.67520400  | 2.39622800  | -0.20144400 |
| C  | 0.43866800  | 3.21107500  | -1.55318200 |
| C  | 0.83045300  | 3.25045700  | 1.61424200  |
| O  | 2.67397900  | -2.39751000 | -0.20073300 |
| C  | 0.43744400  | -3.21107000 | -1.55330300 |
| C  | 0.82808500  | -3.25077100 | 1.61423400  |
| C  | -1.75791900 | 0.00071600  | 1.50671700  |
| C  | 3.33633800  | 1.18261000  | -0.26804900 |
| C  | 3.33573500  | -1.18425100 | -0.26768300 |
| C  | 1.35423200  | 4.40869200  | -1.88327800 |
| C  | -1.02020200 | 3.68964900  | -1.42058700 |
| C  | 0.54647600  | 2.18962700  | -2.70932000 |
| C  | -0.64261200 | 3.38970300  | 2.04655500  |
| C  | 1.47570100  | 4.64808600  | 1.52006300  |
| C  | 1.58413300  | 2.41649200  | 2.67744500  |
| C  | 0.54589800  | -2.18957600 | -2.70933800 |
| C  | 1.35265100  | -4.40899400 | -1.88329100 |
| C  | -1.02162800 | -3.68912900 | -1.42108300 |
| C  | 1.58204700  | -2.41741000 | 2.67770600  |
| C  | 1.47238800  | -4.64884000 | 1.52011200  |
| C  | -0.64520900 | -3.38901700 | 2.04609000  |
| O  | -1.02433400 | 0.00059000  | 2.47793500  |
| H  | -2.85309900 | 0.00103200  | 1.58890200  |
| C  | 4.72275300  | 1.21141500  | -0.42429500 |
| C  | 4.72213500  | -1.21380700 | -0.42391300 |
| H  | 1.03545200  | 4.82547100  | -2.84723800 |
| H  | 2.40164400  | 4.10980000  | -1.97182200 |
| H  | 1.28569100  | 5.20795800  | -1.14255800 |
| H  | -1.35942400 | 4.04568100  | -2.40192600 |
| H  | -1.10671100 | 4.53208600  | -0.72666500 |
| H  | -1.71206400 | 2.90296300  | -1.10589600 |
| H  | 1.56599400  | 1.80347500  | -2.81796000 |
| H  | 0.27764300  | 2.68974600  | -3.64859800 |
| H  | -0.13473900 | 1.34562300  | -2.57368000 |
| H  | -1.25011900 | 3.93587500  | 1.32117000  |
| H  | -0.67143300 | 3.95248800  | 2.98862400  |
| H  | -1.10470800 | 2.42033000  | 2.23695900  |
| H  | 2.49107300  | 4.60927200  | 1.11555900  |

|   |             |             |             |
|---|-------------|-------------|-------------|
| H | 1.53188000  | 5.07318800  | 2.53042400  |
| H | 0.87963700  | 5.33627700  | 0.91336100  |
| H | 1.51185700  | 2.93464900  | 3.64222100  |
| H | 2.64547000  | 2.30725700  | 2.43414100  |
| H | 1.14189900  | 1.42325300  | 2.79703700  |
| H | 0.27707300  | -2.68951200 | -3.64871500 |
| H | 1.56558900  | -1.80381000 | -2.81772800 |
| H | -0.13501500 | -1.34531800 | -2.57376400 |
| H | 2.40017100  | -4.11044500 | -1.97171500 |
| H | 1.03384000  | -4.82566100 | -2.84728900 |
| H | 1.28378100  | -5.20824500 | -1.14258400 |
| H | -1.36075000 | -4.04497000 | -2.40252700 |
| H | -1.71328100 | -2.90222200 | -1.10648800 |
| H | -1.10859300 | -4.53158900 | -0.72724300 |
| H | 1.14049600  | -1.42385700 | 2.79722100  |
| H | 2.64353400  | -2.30893100 | 2.43471500  |
| H | 1.50910900  | -2.93555900 | 3.64243500  |
| H | 2.48791500  | -4.61065900 | 1.11594100  |
| H | 0.87604700  | -5.33654400 | 0.91312900  |
| H | 1.52794700  | -5.07409900 | 2.53044100  |
| H | -0.67470700 | -3.95189400 | 2.98808200  |
| H | -1.25289300 | -3.93466100 | 1.32045800  |
| H | -1.10667400 | -2.41933800 | 2.23646700  |
| H | 5.23902100  | 2.16391300  | -0.48369300 |
| C | 5.40827900  | -0.00138300 | -0.50005900 |
| H | 5.23792100  | -2.16658400 | -0.48302700 |
| H | 6.48788000  | -0.00167700 | -0.62126700 |
| H | -7.70483500 | 1.23715600  | 0.48865600  |
| C | -6.79625800 | 0.69899600  | 0.23283200  |
| C | -6.79641700 | -0.69678300 | 0.23288600  |
| C | -5.63703800 | 1.42578300  | -0.09364600 |
| C | -5.63736300 | -1.42385800 | -0.09353500 |
| H | -7.70511700 | -1.23471600 | 0.48875100  |
| C | -4.50067500 | 0.70294200  | -0.41868500 |
| H | -5.62592700 | 2.51147300  | -0.09711500 |
| C | -4.50083500 | -0.70130200 | -0.41862900 |
| H | -5.62649900 | -2.50955100 | -0.09691900 |
| O | -3.26667900 | 1.17192400  | -0.77102700 |
| O | -3.26694500 | -1.17059100 | -0.77093100 |
| B | -2.41537200 | 0.00056500  | -0.95652700 |
| H | -1.71628300 | 0.00044300  | -1.93327900 |

### IMA3-1

|    | x           | y           | z           |
|----|-------------|-------------|-------------|
| Ni | 0.57293900  | 0.27548200  | 0.13338700  |
| P  | 1.97234600  | -1.50913400 | -0.07010600 |
| P  | -0.36648300 | 2.31028100  | -0.03944100 |
| O  | -1.46345200 | -0.04076100 | 3.58509100  |
| C  | 2.11313700  | 1.23228400  | -0.46014500 |
| O  | 3.39822700  | -0.78194700 | -0.58750800 |
| C  | 2.65581000  | -2.37312800 | 1.47688100  |
| C  | 1.64898300  | -2.69008500 | -1.53354900 |
| O  | 0.93246300  | 3.31246000  | -0.40541700 |
| C  | -0.99320100 | 3.18579100  | 1.51859100  |
| C  | -1.45051600 | 2.56050100  | -1.57635200 |
| C  | -1.36903900 | -1.24009500 | 3.43385900  |
| C  | 3.32878500  | 0.59153800  | -0.72727700 |
| C  | 2.10953500  | 2.62302800  | -0.63550700 |



|   |             |             |             |
|---|-------------|-------------|-------------|
| C | 3.94949000  | -3.15380500 | 1.17125300  |
| C | 1.62391100  | -3.31159800 | 2.13030800  |
| C | 2.97771900  | -1.21964800 | 2.45699000  |
| C | 0.88736000  | -3.95850400 | -1.10286700 |
| C | 2.96193100  | -3.08610500 | -2.24024400 |
| C | 0.77322900  | -1.88834000 | -2.52334300 |
| C | -0.01892900 | 2.73930100  | 2.63401700  |
| C | -0.92302200 | 4.72337000  | 1.39912100  |
| C | -2.42694100 | 2.74107500  | 1.86445800  |
| C | -0.55676800 | 2.23195600  | -2.79421200 |
| C | -1.96720100 | 4.00401100  | -1.71971200 |
| C | -2.63143900 | 1.57387500  | -1.54606100 |
| O | -1.41053600 | -1.91087700 | 2.29064500  |
| H | -1.21877700 | -1.93491600 | 4.27779900  |
| C | 4.48153200  | 1.26828300  | -1.12951200 |
| C | 3.23155900  | 3.34940600  | -1.03585700 |
| H | 4.38385900  | -3.49888100 | 2.11858300  |
| H | 4.69345100  | -2.53411400 | 0.66356500  |
| H | 3.75707200  | -4.04207300 | 0.56129800  |
| H | 1.99769200  | -3.60121400 | 3.12119000  |
| H | 1.47920400  | -4.22989300 | 1.55719100  |
| H | 0.64778700  | -2.84150600 | 2.26289200  |
| H | 3.71029900  | -0.51965700 | 2.04331500  |
| H | 3.40080200  | -1.64493200 | 3.37581400  |
| H | 2.07992300  | -0.65503900 | 2.73224600  |
| H | 1.52059400  | -4.63837400 | -0.52518700 |
| H | 0.57940900  | -4.49717300 | -2.00872700 |
| H | -0.01724800 | -3.73152900 | -0.53329400 |
| H | 3.51105100  | -2.21371300 | -2.60169900 |
| H | 2.71045600  | -3.71557200 | -3.10366100 |
| H | 3.62929400  | -3.66342900 | -1.59491600 |
| H | 0.59874800  | -2.49743000 | -3.41994400 |
| H | 1.26274800  | -0.96146500 | -2.84274000 |
| H | -0.19959600 | -1.64332800 | -2.08701900 |
| H | -0.28778900 | 3.25826600  | 3.56288000  |
| H | 1.01791100  | 3.00077000  | 2.39368900  |
| H | -0.09188900 | 1.66701700  | 2.82577500  |
| H | 0.07392900  | 5.06491500  | 1.10911900  |
| H | -1.15491000 | 5.14869900  | 2.38389500  |
| H | -1.64858200 | 5.12896400  | 0.69097500  |
| H | -2.69318600 | 3.16215400  | 2.84214900  |
| H | -2.52711400 | 1.65596600  | 1.93808700  |
| H | -3.15479200 | 3.11884000  | 1.13784300  |
| H | -0.14612600 | 1.21871400  | -2.74013500 |
| H | 0.27538800  | 2.93469300  | -2.89423200 |
| H | -1.16835100 | 2.29784600  | -3.70298000 |
| H | -1.15623500 | 4.73701900  | -1.66966000 |
| H | -2.71366400 | 4.25165100  | -0.95966300 |
| H | -2.45231200 | 4.10704200  | -2.69905000 |
| H | -3.24241300 | 1.72471600  | -2.44497200 |
| H | -3.27688400 | 1.71034600  | -0.67581200 |
| H | -2.29197200 | 0.53498400  | -1.54817000 |
| H | 5.39644700  | 0.71598000  | -1.31762500 |
| C | 4.41808100  | 2.65482600  | -1.27829900 |
| H | 3.16700700  | 4.42623900  | -1.15284300 |
| H | 5.30419400  | 3.20093000  | -1.58972300 |
| H | -5.42027900 | -3.30550400 | -2.74706700 |
| C | -4.95319300 | -2.71770900 | -1.96169500 |

|   |             |             |             |
|---|-------------|-------------|-------------|
| C | -5.67313500 | -1.69524800 | -1.34199300 |
| C | -3.62913000 | -3.00655600 | -1.58372600 |
| C | -5.09868800 | -0.91631700 | -0.32095300 |
| H | -6.69596600 | -1.49522400 | -1.64909000 |
| C | -3.07330900 | -2.23736200 | -0.57546400 |
| H | -3.06321200 | -3.80492300 | -2.05398300 |
| C | -3.79459500 | -1.20629500 | 0.04452800  |
| H | -5.65213100 | -0.12261800 | 0.17137800  |
| O | -1.82002700 | -2.32255900 | -0.03442500 |
| O | -3.02382300 | -0.59363100 | 0.99211600  |
| B | -1.75979600 | -1.30440600 | 1.00205100  |
| H | -0.76963000 | -0.45410200 | 0.70718000  |

**IMA4-1**

|    | x           | y           | z           |
|----|-------------|-------------|-------------|
| Ni | 0.66181900  | 0.00001900  | -0.04887500 |
| P  | 0.95053800  | 2.22245500  | -0.11536700 |
| P  | 0.95146600  | -2.22218100 | -0.11539700 |
| O  | -1.59326800 | -0.00001600 | 2.11473000  |
| C  | 2.55791500  | 0.00058900  | -0.22959500 |
| O  | 2.61779900  | 2.39399200  | -0.24790800 |
| C  | 0.38636100  | 3.07322200  | -1.71090800 |
| C  | 0.64960100  | 3.23709600  | 1.45967200  |
| O  | 2.61880100  | -2.39283400 | -0.24838500 |
| C  | 0.38750000  | -3.07352000 | -1.71070800 |
| C  | 0.65132800  | -3.23664600 | 1.45985800  |
| C  | -2.45080700 | -0.00096800 | 3.14924500  |
| C  | 3.29751200  | 1.18800600  | -0.30576600 |
| C  | 3.29799000  | -1.18653100 | -0.30598400 |
| C  | 0.79336800  | 4.55730300  | -1.77807100 |
| C  | -1.13939300 | 2.92919000  | -1.87594400 |
| C  | 1.08448200  | 2.31153100  | -2.86101200 |
| C  | -0.82030700 | 3.68572000  | 1.56888900  |
| C  | 1.58238400  | 4.46348300  | 1.54850000  |
| C  | 0.98983700  | 2.27820900  | 2.62535500  |
| C  | 1.08494800  | -2.31146200 | -2.86098600 |
| C  | 0.79549200  | -4.55733800 | -1.77776500 |
| C  | -1.13836300 | -2.93053900 | -1.87557400 |
| C  | 0.99121500  | -2.27734700 | 2.62530800  |
| C  | 1.58469200  | -4.46257100 | 1.54882500  |
| C  | -0.81838000 | -3.68590100 | 1.56930500  |
| O  | -2.08657100 | -0.00070700 | 4.29877700  |
| H  | -3.51394200 | -0.00207900 | 2.85221500  |
| C  | 4.68611700  | 1.21694900  | -0.43922800 |
| C  | 4.68660900  | -1.21488600 | -0.43943900 |
| H  | 0.57312000  | 4.93907800  | -2.78344400 |
| H  | 1.86305600  | 4.69682200  | -1.59377800 |
| H  | 0.23158800  | 5.17056400  | -1.06745500 |
| H  | -1.43054200 | 3.37022800  | -2.83801800 |
| H  | -1.70139700 | 3.43933500  | -1.09042500 |
| H  | -1.45321600 | 1.88210700  | -1.87602600 |
| H  | 2.17346400  | 2.40065100  | -2.81027400 |
| H  | 0.75175900  | 2.73549000  | -3.81677900 |
| H  | 0.82666000  | 1.24695200  | -2.85995400 |
| H  | -1.06121100 | 4.47058700  | 0.84390400  |
| H  | -0.98181200 | 4.10642200  | 2.56943400  |
| H  | -1.52932700 | 2.86519500  | 1.43528400  |
| H  | 2.63437300  | 4.17980800  | 1.46662300  |

|   |             |             |             |
|---|-------------|-------------|-------------|
| H | 1.43209200  | 4.93488300  | 2.52817800  |
| H | 1.36788700  | 5.21636800  | 0.78656000  |
| H | 0.89081000  | 2.82584100  | 3.57125900  |
| H | 2.02097000  | 1.91268100  | 2.56054200  |
| H | 0.31369000  | 1.42042500  | 2.66260600  |
| H | 0.75233400  | -2.73569100 | -3.81667100 |
| H | 2.17399500  | -2.39988500 | -2.81042500 |
| H | 0.82643600  | -1.24704700 | -2.85994200 |
| H | 1.86531600  | -4.69612800 | -1.59371800 |
| H | 0.57524400  | -4.93940900 | -2.78302600 |
| H | 0.23428800  | -5.17086400 | -1.06692100 |
| H | -1.42926800 | -3.37157700 | -2.83772100 |
| H | -1.45295000 | -1.88368900 | -1.87538500 |
| H | -1.69992300 | -3.44131100 | -1.09014000 |
| H | 0.31464900  | -1.41988200 | 2.66243400  |
| H | 2.02215200  | -1.91130300 | 2.56031000  |
| H | 0.89254800  | -2.82481900 | 3.57134100  |
| H | 2.63653700  | -4.17840600 | 1.46676000  |
| H | 1.37046900  | -5.21569400 | 0.78703800  |
| H | 1.43475200  | -4.93387200 | 2.52860400  |
| H | -0.97967900 | -4.10632100 | 2.57000200  |
| H | -1.05893700 | -4.47112900 | 0.84459900  |
| H | -1.52778100 | -2.86574300 | 1.43542700  |
| H | 5.20770800  | 2.16710000  | -0.49056900 |
| C | 5.37026900  | 0.00117600  | -0.50259900 |
| H | 5.20858700  | -2.16481600 | -0.49094400 |
| H | 6.45193700  | 0.00140300  | -0.60445900 |
| H | -6.72658800 | 1.23423500  | -2.15279000 |
| C | -5.93323300 | 0.69682500  | -1.64085200 |
| C | -5.93275100 | -0.69908400 | -1.64100200 |
| C | -4.92282900 | 1.42485200  | -0.98713800 |
| C | -4.92183900 | -1.42654700 | -0.98744300 |
| H | -6.72573300 | -1.23693400 | -2.15305600 |
| C | -3.93105700 | 0.70093300  | -0.34688600 |
| H | -4.91823000 | 2.51038600  | -0.97495000 |
| C | -3.93057500 | -0.70207200 | -0.34703900 |
| H | -4.91647800 | -2.51208100 | -0.97548700 |
| O | -2.85773800 | 1.16873600  | 0.36006200  |
| O | -2.85692700 | -1.16928500 | 0.35981800  |
| B | -2.08131500 | -0.00005500 | 0.74723900  |
| H | -0.95911700 | 0.00064700  | 0.02014300  |

#### IMB1-1

|    | x          | y           | z           |
|----|------------|-------------|-------------|
| Ni | 1.10802200 | 0.00054700  | -0.07650300 |
| P  | 1.44835400 | 2.27065600  | -0.12551100 |
| P  | 1.44502700 | -2.26971400 | -0.15023100 |
| C  | 2.97368400 | -0.00272900 | 0.28696000  |
| O  | 3.06213300 | 2.39552400  | 0.31442300  |
| C  | 1.50431100 | 3.11582100  | -1.83375200 |
| C  | 0.67733300 | 3.35918200  | 1.22557600  |
| O  | 3.05954700 | -2.40125300 | 0.28523200  |
| C  | 1.49651900 | -3.09481600 | -1.86840600 |
| C  | 0.67672200 | -3.37340600 | 1.19037200  |
| C  | 3.70469500 | 1.17996700  | 0.47389900  |
| C  | 3.70338000 | -1.18841400 | 0.45936700  |
| C  | 2.52846800 | 4.27030400  | -1.87127300 |
| C  | 0.11420800 | 3.62780700  | -2.25915900 |

|   |             |             |             |
|---|-------------|-------------|-------------|
| C | 1.97625200  | 2.02704100  | -2.82390400 |
| C | -0.85566900 | 3.43370400  | 1.08011300  |
| C | 1.26318400  | 4.78485100  | 1.23789700  |
| C | 1.02748600  | 2.66306100  | 2.56162400  |
| C | 1.96928300  | -1.99539500 | -2.84639100 |
| C | 2.51789400  | -4.25109500 | -1.92161700 |
| C | 0.10453300  | -3.59871600 | -2.29750300 |
| C | 1.02759300  | -2.69015700 | 2.53286600  |
| C | 1.26557800  | -4.79786700 | 1.18746200  |
| C | -0.85630100 | -3.44958500 | 1.04658100  |
| C | 5.05812100  | 1.20581800  | 0.81284500  |
| C | 5.05678200  | -1.21992100 | 0.79793200  |
| H | 2.58330400  | 4.64240000  | -2.90235000 |
| H | 3.52693700  | 3.93792700  | -1.57655500 |
| H | 2.24533600  | 5.11091600  | -1.23501900 |
| H | 0.16671200  | 3.93624900  | -3.31139800 |
| H | -0.18638900 | 4.50859000  | -1.68210100 |
| H | -0.67234700 | 2.87080400  | -2.18047900 |
| H | 2.94241800  | 1.60035200  | -2.53304900 |
| H | 2.09680900  | 2.48214800  | -3.81541600 |
| H | 1.24820900  | 1.21735000  | -2.91202000 |
| H | -1.17303100 | 3.92181900  | 0.15616600  |
| H | -1.25720600 | 4.01610600  | 1.91920400  |
| H | -1.32265100 | 2.44856100  | 1.11599300  |
| H | 2.35695600  | 4.77975400  | 1.25809400  |
| H | 0.91269100  | 5.29903200  | 2.14215900  |
| H | 0.92805000  | 5.37407600  | 0.37957500  |
| H | 0.59251300  | 3.24594200  | 3.38368000  |
| H | 2.10875500  | 2.61189100  | 2.72064300  |
| H | 0.61439800  | 1.65170300  | 2.61486300  |
| H | 2.08381800  | -2.43837500 | -3.84409000 |
| H | 2.93859800  | -1.57691200 | -2.55417100 |
| H | 1.24474100  | -1.18122500 | -2.92140300 |
| H | 3.51746800  | -3.92490100 | -1.62375000 |
| H | 2.57087100  | -4.61017700 | -2.95739900 |
| H | 2.23323500  | -5.09903400 | -1.29588000 |
| H | 0.15453700  | -3.89431200 | -3.35354600 |
| H | -0.68056100 | -2.84133900 | -2.20831300 |
| H | -0.19656900 | -4.48600400 | -1.73078900 |
| H | 0.61291500  | -1.68008000 | 2.59674700  |
| H | 2.10900100  | -2.63872900 | 2.69087900  |
| H | 0.59482700  | -3.28203100 | 3.34964400  |
| H | 2.35936200  | -4.79036300 | 1.20412700  |
| H | 0.92886500  | -5.37996900 | 0.32490500  |
| H | 0.91918500  | -5.32124700 | 2.08802700  |
| H | -1.25533400 | -4.04056600 | 1.88085800  |
| H | -1.17401700 | -3.93001400 | 0.11873300  |
| H | -1.32541700 | -2.46586700 | 1.09254000  |
| H | 5.56298500  | 2.15720600  | 0.94445900  |
| C | 5.72613900  | -0.00846700 | 0.97487000  |
| H | 5.56057000  | -2.17342000 | 0.91787700  |
| H | 6.77973700  | -0.01067500 | 1.23980900  |
| H | -3.81867200 | -0.04755700 | 5.94214000  |
| C | -3.70701800 | -0.03902600 | 4.86185600  |
| C | -4.84705300 | -0.03431300 | 4.05116800  |
| C | -2.41620400 | -0.03296100 | 4.30825400  |
| C | -4.75099100 | -0.02333600 | 2.65048000  |
| H | -5.83013600 | -0.03925900 | 4.51277100  |

|   |             |             |             |
|---|-------------|-------------|-------------|
| C | -2.33640600 | -0.02214000 | 2.92763000  |
| H | -1.52498800 | -0.03660000 | 4.92750400  |
| C | -3.47417700 | -0.01749000 | 2.11777300  |
| H | -5.62599600 | -0.01963900 | 2.00944300  |
| O | -1.21159300 | -0.01470900 | 2.12253500  |
| O | -3.09388900 | -0.00716300 | 0.79458500  |
| B | -1.70255800 | -0.00568000 | 0.80404500  |
| O | -0.89024900 | 0.00270900  | -0.27337500 |
| H | -6.77892300 | -1.20766200 | -3.06286000 |
| C | -5.86327200 | -0.67087100 | -2.82877600 |
| C | -5.86267000 | 0.72375200  | -2.81691900 |
| C | -4.69246100 | -1.39967200 | -2.54533800 |
| C | -4.69119800 | 1.44657600  | -2.52118400 |
| H | -6.77783200 | 1.26526400  | -3.04186000 |
| C | -3.54401800 | -0.68177900 | -2.25941200 |
| H | -4.68215700 | -2.48565900 | -2.55080900 |
| C | -3.54342800 | 0.72287900  | -2.24748900 |
| H | -4.67988300 | 2.53249300  | -2.50826400 |
| O | -2.29976700 | -1.15738800 | -1.96370100 |
| O | -2.29875200 | 1.19232800  | -1.94370200 |
| B | -1.44327000 | 0.01544600  | -1.75958100 |
| H | -0.43513000 | 0.02073400  | -2.42784500 |

#### IMB2-1

|    | x           | y           | z           |
|----|-------------|-------------|-------------|
| Ni | -1.37412500 | -0.00072500 | 0.09424300  |
| P  | -1.66144500 | -2.21749400 | 0.17278500  |
| P  | -1.66392300 | 2.21552600  | 0.18267000  |
| C  | -3.03029900 | -0.00339600 | 1.03854400  |
| O  | -3.08789600 | -2.39653600 | 1.04779400  |
| C  | -2.15075300 | -3.02865600 | -1.46973200 |
| C  | -0.50110900 | -3.26993600 | 1.24329200  |
| O  | -3.09041900 | 2.38953500  | 1.05855700  |
| C  | -2.15410200 | 3.03274100  | -1.45656500 |
| C  | -0.50468900 | 3.26494200  | 1.25740400  |
| C  | -3.67735900 | -1.19197300 | 1.39953400  |
| C  | -3.67867100 | 1.18280900  | 1.40485600  |
| C  | -2.51608300 | -4.51761100 | -1.32275800 |
| C  | -1.01798800 | -2.85425600 | -2.50055700 |
| C  | -3.39508100 | -2.25742500 | -1.96530000 |
| C  | 0.74770200  | -3.70793100 | 0.45433900  |
| C  | -1.21148900 | -4.50587600 | 1.83461600  |
| C  | -0.08185300 | -2.34228800 | 2.40825400  |
| C  | -3.39764100 | 2.26217900  | -1.95520200 |
| C  | -2.52107100 | 4.52068800  | -1.30358800 |
| C  | -1.02117300 | 2.86365100  | -2.48809200 |
| C  | -0.08381000 | 2.33276600  | 2.41815600  |
| C  | -1.21670200 | 4.49725300  | 1.85438600  |
| C  | 0.74323900  | 3.70841400  | 0.47012800  |
| C  | -4.88852200 | -1.22321300 | 2.09191300  |
| C  | -4.88987000 | 1.20964000  | 2.09734900  |
| H  | -2.93365600 | -4.87486000 | -2.27310300 |
| H  | -3.26956700 | -4.67860700 | -0.54554200 |
| H  | -1.64246500 | -5.13687600 | -1.09897300 |
| H  | -1.34801400 | -3.27694300 | -3.45838400 |
| H  | -0.09696200 | -3.36394500 | -2.20938600 |
| H  | -0.77293700 | -1.80130700 | -2.66348000 |
| H  | -4.24500400 | -2.36753600 | -1.28569400 |

|   |             |             |             |
|---|-------------|-------------|-------------|
| H | -3.68814800 | -2.65513900 | -2.94514800 |
| H | -3.18887200 | -1.18887500 | -2.08620900 |
| H | 0.50960600  | -4.47063300 | -0.29485400 |
| H | 1.46290400  | -4.15644200 | 1.15578200  |
| H | 1.24910700  | -2.87785800 | -0.04922500 |
| H | -2.10957100 | -4.22985700 | 2.39233100  |
| H | -0.51771300 | -4.99895400 | 2.52758800  |
| H | -1.48996100 | -5.23837200 | 1.07356800  |
| H | 0.56110900  | -2.90701400 | 3.09560700  |
| H | -0.94997600 | -1.99222700 | 2.97805600  |
| H | 0.48027500  | -1.47357300 | 2.05645500  |
| H | -3.69085000 | 2.66319300  | -2.93365500 |
| H | -4.24781800 | 2.36899500  | -1.27538200 |
| H | -3.19039700 | 1.19427200  | -2.07990500 |
| H | -3.27441000 | 4.67763100  | -0.52541400 |
| H | -2.93949200 | 4.88119800  | -2.25232900 |
| H | -1.64811800 | 5.14015400  | -1.07775600 |
| H | -1.35179600 | 3.28946900  | -3.44432100 |
| H | -0.77476900 | 1.81163500  | -2.65500300 |
| H | -0.10080100 | 3.37347400  | -2.19508400 |
| H | 0.48034200  | 1.46693700  | 2.06251300  |
| H | -0.95139500 | 1.97816100  | 2.98595900  |
| H | 0.55767200  | 2.89564900  | 3.10839500  |
| H | -2.11393700 | 4.21746300  | 2.41157700  |
| H | -1.49682700 | 5.23246400  | 1.09656200  |
| H | -0.52320000 | 4.98853600  | 2.54890400  |
| H | 1.45799600  | 4.15465500  | 1.17346900  |
| H | 0.50371700  | 4.47430400  | -0.27535000 |
| H | 1.24573200  | 2.88151200  | -0.03753900 |
| H | -5.34512800 | -2.17368900 | 2.34819600  |
| C | -5.48395800 | -0.00788200 | 2.43737300  |
| H | -5.34751100 | 2.15846500  | 2.35786500  |
| H | -6.42654200 | -0.00961400 | 2.97780000  |
| H | 7.63934100  | -0.01047800 | 4.12715800  |
| C | 6.95684800  | -0.00822300 | 3.28209000  |
| C | 7.47109700  | -0.00531300 | 1.98164700  |
| C | 5.57276800  | -0.00828300 | 3.52117000  |
| C | 6.62499800  | -0.00233300 | 0.86057300  |
| H | 8.54697300  | -0.00535000 | 1.83217500  |
| C | 4.74940000  | -0.00533600 | 2.40928200  |
| H | 5.16252900  | -0.01051800 | 4.52575700  |
| C | 5.26402600  | -0.00242200 | 1.10884900  |
| H | 7.01122000  | -0.00005800 | -0.15329200 |
| O | 3.37306600  | -0.00469500 | 2.35444100  |
| O | 4.22302600  | 0.00011300  | 0.20715100  |
| B | 3.06238300  | -0.00131400 | 0.98785400  |
| O | 1.79577800  | 0.00018900  | 0.54742900  |
| H | 3.19526100  | 1.25288700  | -5.96896700 |
| C | 2.89042300  | 0.71273400  | -5.07684500 |
| C | 2.89031600  | -0.68300400 | -5.08052800 |
| C | 2.50324700  | 1.43707500  | -3.93489700 |
| C | 2.50304300  | -1.41330200 | -3.94241500 |
| H | 3.19507200  | -1.21848500 | -5.97548900 |
| C | 2.12387000  | 0.71070100  | -2.81858400 |
| H | 2.50809700  | 2.52265200  | -3.91903800 |
| C | 2.12377100  | -0.69277700 | -2.82227700 |
| H | 2.50772800  | -2.49894800 | -3.93228300 |
| O | 1.71724300  | 1.17585500  | -1.60042700 |

|   |             |             |             |
|---|-------------|-------------|-------------|
| O | 1.71705600  | -1.16429900 | -1.60660800 |
| B | 1.36198700  | 0.00373100  | -0.81586700 |
| H | -0.00268400 | 0.00394100  | -0.74066700 |

**IMC1-1**

|    | x           | y           | z           |
|----|-------------|-------------|-------------|
| Ni | 0.67408100  | 0.05102300  | 0.15539400  |
| P  | 0.60942100  | 2.33675100  | 0.03487300  |
| P  | 1.34247700  | -2.13087100 | 0.00627100  |
| C  | 2.53929100  | 0.36227900  | -0.05266200 |
| O  | 2.23967400  | 2.73733100  | 0.09080700  |
| C  | 0.12075500  | 3.12441300  | -1.63064500 |
| C  | 0.00473900  | 3.29950600  | 1.55153700  |
| O  | 3.00034500  | -1.98628500 | -0.21670800 |
| C  | 0.87797900  | -3.07925300 | -1.57638900 |
| C  | 1.34737300  | -3.19987300 | 1.58142200  |
| C  | 3.09099000  | 1.65146000  | -0.03005100 |
| C  | 3.46558300  | -0.68139600 | -0.18805700 |
| C  | 0.85473300  | 4.46005100  | -1.87215700 |
| C  | -1.40177500 | 3.33799300  | -1.74751600 |
| C  | 0.57951800  | 2.11511300  | -2.70890000 |
| C  | -1.53747900 | 3.31630100  | 1.62094200  |
| C  | 0.54732000  | 4.74181000  | 1.60110100  |
| C  | 0.57530100  | 2.52252600  | 2.76185100  |
| C  | 0.87882100  | -2.01033300 | -2.69412300 |
| C  | 1.91834900  | -4.16018900 | -1.93450400 |
| C  | -0.52602500 | -3.70832300 | -1.47809500 |
| C  | 1.88651900  | -2.26595800 | 2.69101800  |
| C  | 2.28976800  | -4.41440200 | 1.46435200  |
| C  | -0.06791900 | -3.67687500 | 1.95832300  |
| C  | 4.45935900  | 1.90766900  | -0.12820000 |
| C  | 4.84301500  | -0.48312100 | -0.29192900 |
| H  | 0.62702700  | 4.79600100  | -2.89191000 |
| H  | 1.93898400  | 4.35550600  | -1.78263600 |
| H  | 0.52683000  | 5.24817000  | -1.18975200 |
| H  | -1.63690000 | 3.56921100  | -2.79453900 |
| H  | -1.73601900 | 4.19016300  | -1.14826300 |
| H  | -1.99260900 | 2.46423500  | -1.46069500 |
| H  | 1.65487200  | 1.91471600  | -2.65540400 |
| H  | 0.36792500  | 2.53984400  | -3.69859500 |
| H  | 0.04201200  | 1.16653100  | -2.62808900 |
| H  | -1.95992800 | 4.08395400  | 0.96775900  |
| H  | -1.84495200 | 3.55559200  | 2.64691400  |
| H  | -1.99606500 | 2.36473800  | 1.34009800  |
| H  | 1.63457500  | 4.77577400  | 1.48854200  |
| H  | 0.29261200  | 5.17844100  | 2.57560400  |
| H  | 0.09595500  | 5.37748300  | 0.83488800  |
| H  | 0.28437500  | 3.03938000  | 3.68508900  |
| H  | 1.66880300  | 2.47346800  | 2.73506800  |
| H  | 0.18636100  | 1.50126400  | 2.81431200  |
| H  | 0.67250300  | -2.50476700 | -3.65194100 |
| H  | 1.84804500  | -1.50701000 | -2.78100800 |
| H  | 0.10274400  | -1.25705700 | -2.53307500 |
| H  | 2.93421700  | -3.75759000 | -1.96130700 |
| H  | 1.67993300  | -4.54908800 | -2.93276100 |
| H  | 1.89834100  | -5.00658700 | -1.24392700 |
| H  | -0.81302100 | -4.06457200 | -2.47585500 |
| H  | -1.29919300 | -3.00715600 | -1.15039600 |

|   |             |             |             |
|---|-------------|-------------|-------------|
| H | -0.53582500 | -4.57792500 | -0.81375900 |
| H | 1.24983000  | -1.38716200 | 2.83614700  |
| H | 2.90062900  | -1.91659900 | 2.47346500  |
| H | 1.91648800  | -2.81942900 | 3.63810300  |
| H | 3.27794600  | -4.13123000 | 1.09203900  |
| H | 1.87904000  | -5.19150000 | 0.81440800  |
| H | 2.41671100  | -4.85833900 | 2.46037600  |
| H | -0.03241200 | -4.12956500 | 2.95773200  |
| H | -0.44580700 | -4.43592700 | 1.26953800  |
| H | -0.79318900 | -2.86172300 | 1.99014900  |
| H | 4.82107900  | 2.93042900  | -0.10494700 |
| C | 5.32970400  | 0.82452800  | -0.25876800 |
| H | 5.50621900  | -1.33610100 | -0.39222400 |
| H | 6.39877000  | 1.00130100  | -0.33727900 |
| H | -0.93802800 | -0.59507700 | 2.52956800  |
| H | -2.33402900 | 0.43603700  | 2.12927600  |
| C | -1.76313500 | -0.44784600 | 1.82782500  |
| H | -2.42541900 | -1.31878800 | 1.86160700  |
| O | -1.23516000 | -0.29276700 | 0.51000200  |
| C | -5.68083300 | 0.81381300  | 0.06718100  |
| C | -4.45782200 | 0.22247300  | -0.20530000 |
| C | -4.33810200 | -1.17102200 | -0.35836400 |
| C | -5.43974400 | -2.00384700 | -0.24223400 |
| C | -6.68594700 | -1.40818100 | 0.03034200  |
| C | -6.80440100 | -0.02694900 | 0.18188900  |
| H | -5.76259800 | 1.89090300  | 0.18185300  |
| H | -5.33703000 | -3.07835500 | -0.36348200 |
| H | -7.56698600 | -2.03821400 | 0.12085200  |
| H | -7.77683300 | 0.41174600  | 0.38984600  |
| O | -3.04664200 | -1.51143400 | -0.61554300 |
| O | -3.24553900 | 0.82206400  | -0.35947100 |
| B | -2.25683100 | -0.25786200 | -0.61882300 |
| H | -1.60160700 | -0.08814200 | -1.62748800 |

#### IMC2-1

|    | x           | y           | z           |
|----|-------------|-------------|-------------|
| Ni | 0.62101600  | 0.00038700  | 0.02324800  |
| P  | 0.90183100  | 2.21452800  | -0.06554600 |
| P  | 0.90369900  | -2.21367600 | -0.06566400 |
| O  | -1.54075700 | -0.00161600 | 2.31318100  |
| C  | 2.51136600  | 0.00122700  | -0.22765100 |
| O  | 2.56608900  | 2.39399800  | -0.24792900 |
| C  | 0.28532700  | 3.05477500  | -1.64750500 |
| C  | 0.64187700  | 3.24222300  | 1.50842000  |
| O  | 2.56816000  | -2.39150000 | -0.24810100 |
| C  | 0.28827100  | -3.05481900 | -1.64754400 |
| C  | 0.64504100  | -3.24150700 | 1.50842900  |
| C  | 3.24685400  | 1.18886000  | -0.32838900 |
| C  | 3.24786700  | -1.18577100 | -0.32843200 |
| C  | 0.67874100  | 4.54145400  | -1.73292900 |
| C  | -1.24325500 | 2.89541700  | -1.76702500 |
| C  | 0.95641100  | 2.29450300  | -2.81442900 |
| C  | -0.82142900 | 3.70504300  | 1.64438400  |
| C  | 1.58837000  | 4.45913400  | 1.57537500  |
| C  | 0.98883000  | 2.28285800  | 2.67173900  |
| C  | 0.95867700  | -2.29392600 | -2.81445600 |
| C  | 0.68326500  | -4.54109500 | -1.73277000 |
| C  | -1.24046700 | -2.89720500 | -1.76738900 |



|   |             |             |             |
|---|-------------|-------------|-------------|
| C | 0.99178600  | -2.28186400 | 2.67157700  |
| C | 1.59239300  | -4.45777200 | 1.57522100  |
| C | -0.81790000 | -3.70532600 | 1.64482900  |
| C | 4.63053400  | 1.21864400  | -0.50759100 |
| C | 4.63157900  | -1.21435500 | -0.50761800 |
| H | 0.41914600  | 4.92000700  | -2.73021000 |
| H | 1.75379900  | 4.68762800  | -1.58874000 |
| H | 0.14023300  | 5.15291900  | -1.00299300 |
| H | -1.56670800 | 3.32407000  | -2.72447100 |
| H | -1.78712000 | 3.40759500  | -0.97020500 |
| H | -1.54643800 | 1.84536500  | -1.74719000 |
| H | 2.04564700  | 2.39272000  | -2.79487500 |
| H | 0.59289200  | 2.71183400  | -3.76193400 |
| H | 0.70792200  | 1.22793300  | -2.80151200 |
| H | -1.07190500 | 4.48280200  | 0.91505500  |
| H | -0.95522600 | 4.14226800  | 2.64242900  |
| H | -1.53838800 | 2.88736500  | 1.53764500  |
| H | 2.63605900  | 4.16406800  | 1.47979300  |
| H | 1.45696300  | 4.94004900  | 2.55335700  |
| H | 1.37086100  | 5.20834200  | 0.81042200  |
| H | 0.90681900  | 2.83431500  | 3.61786600  |
| H | 2.01611000  | 1.90850000  | 2.59506900  |
| H | 0.30239200  | 1.43210400  | 2.70842700  |
| H | 0.59582300  | -2.71180800 | -3.76197300 |
| H | 2.04802400  | -2.39085900 | -2.79468600 |
| H | 0.70893000  | -1.22764200 | -2.80172800 |
| H | 1.75841200  | -4.68621000 | -1.58820200 |
| H | 0.42438900  | -4.91993700 | -2.73013000 |
| H | 0.14508800  | -5.15306600 | -1.00301300 |
| H | -1.56317900 | -3.32623800 | -2.72491400 |
| H | -1.54486200 | -1.84751200 | -1.74759200 |
| H | -1.78389700 | -3.41005000 | -0.97069500 |
| H | 0.30478500  | -1.43158400 | 2.70848300  |
| H | 2.01879900  | -1.90686400 | 2.59449900  |
| H | 0.91048400  | -2.83335100 | 3.61774800  |
| H | 2.63983800  | -4.16200400 | 1.47910700  |
| H | 1.37506200  | -5.20731800 | 0.81055400  |
| H | 1.46174300  | -4.93853400 | 2.55337700  |
| H | -0.95114900 | -4.14262900 | 2.64291300  |
| H | -1.06800400 | -4.48326500 | 0.91556500  |
| H | -1.53545700 | -2.88816000 | 1.53823800  |
| H | 5.15073200  | 2.16849900  | -0.57712600 |
| C | 5.31217700  | 0.00243700  | -0.59338700 |
| H | 5.15259100  | -2.16376200 | -0.57717300 |
| H | 6.38994300  | 0.00290400  | -0.73139200 |
| H | -6.69565300 | 1.23395200  | -1.96228000 |
| C | -5.90980400 | 0.69599500  | -1.43903500 |
| C | -5.90873200 | -0.69967700 | -1.44022400 |
| C | -4.90852600 | 1.42298300  | -0.76969900 |
| C | -4.90633400 | -1.42626200 | -0.77213000 |
| H | -6.69375500 | -1.23794500 | -1.96438800 |
| C | -3.92453100 | 0.70105200  | -0.11381200 |
| H | -4.90507600 | 2.50876400  | -0.75689600 |
| C | -3.92344400 | -0.70394000 | -0.11501300 |
| H | -4.90120300 | -2.51205700 | -0.76116500 |
| O | -2.86544900 | 1.16886000  | 0.60581300  |
| O | -2.86363800 | -1.17135400 | 0.60378900  |
| B | -2.07817000 | -0.00099000 | 1.00627400  |

|   |             |             |            |
|---|-------------|-------------|------------|
| H | -0.97364400 | 0.00082900  | 0.19125400 |
| C | -2.47546500 | -0.00302500 | 3.38383000 |
| H | -3.11456300 | -0.89558100 | 3.35687700 |
| H | -1.91155000 | -0.00132700 | 4.32202600 |
| H | -3.11836300 | 0.88675300  | 3.35593400 |

**IMD1-1**

|    | x           | y           | z           |
|----|-------------|-------------|-------------|
| C  | 5.76956200  | 0.62770000  | -0.40337000 |
| C  | 4.46047700  | 0.14390100  | -0.41238000 |
| C  | 3.35313800  | 0.89613500  | 0.00420500  |
| C  | 3.64254700  | 2.19284800  | 0.45075400  |
| C  | 4.93278600  | 2.72470600  | 0.48770800  |
| C  | 5.99293700  | 1.92761700  | 0.05312300  |
| H  | 6.58341500  | -0.00853400 | -0.73544600 |
| H  | 5.08921900  | 3.73808500  | 0.84268300  |
| H  | 7.00458300  | 2.32328600  | 0.07203400  |
| O  | 2.59755400  | 2.99482900  | 0.86717700  |
| O  | 4.25154700  | -1.15619000 | -0.84015800 |
| P  | 1.08090800  | 2.40124700  | 0.44865700  |
| P  | 2.71917000  | -1.73680100 | -0.46937100 |
| C  | 0.17447800  | 2.83396100  | 2.05400200  |
| C  | 0.65312600  | 3.57745900  | -1.01213200 |
| C  | 3.12571400  | -2.88745400 | 1.00174300  |
| C  | 2.37280600  | -2.66543800 | -2.08409000 |
| H  | -1.79005600 | -1.27938300 | -1.27218800 |
| C  | -1.11058700 | -0.42473000 | -1.22511000 |
| O  | -0.27373600 | -0.53693200 | -0.11194700 |
| O  | -1.85265900 | 0.78993200  | -1.16991300 |
| C  | -6.53620200 | -0.42715400 | -1.18571400 |
| C  | -5.32105000 | 0.22669800  | -1.09631800 |
| C  | -5.23131400 | 1.58483500  | -0.77943200 |
| C  | -6.35436000 | 2.35711200  | -0.54414300 |
| C  | -7.59559300 | 1.70688100  | -0.63704800 |
| C  | -7.68410700 | 0.34632400  | -0.94906200 |
| H  | -6.58896500 | -1.48511600 | -1.41828300 |
| H  | -6.27309800 | 3.41072300  | -0.29841200 |
| H  | -8.50408500 | 2.27483000  | -0.45896600 |
| H  | -8.66040900 | -0.12581800 | -1.00816500 |
| O  | -3.90197600 | 1.96090700  | -0.75095000 |
| O  | -4.05105200 | -0.28104400 | -1.28746500 |
| B  | -3.20119600 | 0.79448500  | -1.05274400 |
| H  | -0.49758000 | -0.37714600 | -2.12825900 |
| Ni | 1.57769200  | 0.20812300  | -0.03760500 |
| C  | 0.99353900  | 2.80610700  | -2.30706600 |
| H  | 0.33634100  | 1.94146400  | -2.44024200 |
| H  | 0.84928800  | 3.47091000  | -3.16883600 |
| H  | 2.03238800  | 2.46033900  | -2.31964700 |
| C  | -0.83133500 | 3.98553700  | -1.05205200 |
| H  | -1.10382000 | 4.63635100  | -0.21654000 |
| H  | -1.00622400 | 4.55438900  | -1.97491000 |
| H  | -1.50141000 | 3.12631000  | -1.06130700 |
| C  | 1.52605500  | 4.84921800  | -0.94774700 |
| H  | 1.25551200  | 5.49108100  | -1.79618800 |
| H  | 1.36363400  | 5.42210500  | -0.03082600 |
| H  | 2.59251000  | 4.62316700  | -1.02009600 |
| C  | 0.34890200  | 4.32469300  | 2.40995000  |
| H  | -0.17549500 | 4.98408100  | 1.71220700  |

|   |             |             |             |
|---|-------------|-------------|-------------|
| H | -0.07867000 | 4.49808800  | 3.40586600  |
| H | 1.40319700  | 4.61446500  | 2.44085200  |
| C | -1.32021700 | 2.46483200  | 1.98614500  |
| H | -1.76359900 | 2.66028900  | 2.97120600  |
| H | -1.87333500 | 3.05949600  | 1.25611500  |
| H | -1.48275400 | 1.40910000  | 1.76117900  |
| C | 0.85171600  | 1.97636100  | 3.14898900  |
| H | 0.74745600  | 0.90546100  | 2.94862900  |
| H | 1.91399300  | 2.21572500  | 3.25682600  |
| H | 0.35930500  | 2.18367800  | 4.10742500  |
| C | 3.03913800  | -2.00990100 | 2.27187100  |
| H | 3.72332700  | -1.15602000 | 2.22839200  |
| H | 2.02533000  | -1.63488900 | 2.43605600  |
| H | 3.32010400  | -2.62058800 | 3.13975200  |
| C | 2.12113900  | -4.05086300 | 1.12036000  |
| H | 2.29654200  | -4.55888700 | 2.07763600  |
| H | 1.07797100  | -3.72203600 | 1.10500500  |
| H | 2.26729900  | -4.79660300 | 0.33152100  |
| C | 4.56125600  | -3.44314300 | 0.89189900  |
| H | 4.75150500  | -4.06841900 | 1.77369400  |
| H | 4.70865000  | -4.06654100 | 0.00698400  |
| H | 5.30838900  | -2.64606400 | 0.87376100  |
| C | 1.00632600  | -3.37839800 | -2.03327600 |
| H | 0.73290200  | -3.68877200 | -3.04981900 |
| H | 1.03339800  | -4.27447900 | -1.41028300 |
| H | 0.21066400  | -2.74230200 | -1.64156200 |
| C | 3.48247900  | -3.67699600 | -2.43178200 |
| H | 3.49032700  | -4.53003300 | -1.74702500 |
| H | 3.29790300  | -4.07112400 | -3.43978200 |
| H | 4.47339400  | -3.21363900 | -2.42792700 |
| C | 2.34154400  | -1.57110200 | -3.17678500 |
| H | 1.56397800  | -0.82276100 | -2.98849300 |
| H | 3.30059600  | -1.05127500 | -3.25868900 |
| H | 2.12506500  | -2.04128700 | -4.14421400 |
| C | -2.81465600 | -4.34471100 | 0.92501100  |
| C | -2.23397900 | -3.09072300 | 1.02334300  |
| C | -2.98460200 | -1.96534500 | 1.40140900  |
| C | -4.33423400 | -2.06542000 | 1.69520200  |
| C | -4.93013400 | -3.33746100 | 1.60241700  |
| C | -4.18590000 | -4.45459800 | 1.22395000  |
| H | -2.22522700 | -5.20902700 | 0.63295900  |
| H | -4.90598900 | -1.18970100 | 1.98680100  |
| H | -5.98628900 | -3.44626000 | 1.83464400  |
| H | -4.66614100 | -5.42766000 | 1.16277600  |
| O | -2.19686900 | -0.85166700 | 1.41458400  |
| O | -0.93731100 | -2.73802600 | 0.79204600  |
| B | -0.81739300 | -1.29467500 | 1.11493600  |
| H | -0.01097400 | -1.05364100 | 1.98933800  |

#### IMD2-1

|   | x          | y          | z           |
|---|------------|------------|-------------|
| C | 5.79793500 | 1.11193500 | -0.63539800 |
| C | 4.56616900 | 0.47412500 | -0.48441200 |
| C | 3.38143200 | 1.15399100 | -0.17485900 |
| C | 3.49701300 | 2.54025600 | -0.01004400 |
| C | 4.70302800 | 3.22870400 | -0.14871000 |
| C | 5.84987800 | 2.49731600 | -0.46540100 |
| H | 6.68424700 | 0.53433700 | -0.87709000 |

|    |             |             |             |
|----|-------------|-------------|-------------|
| H  | 4.73393000  | 4.30470200  | -0.01150200 |
| H  | 6.79867200  | 3.01436500  | -0.57939600 |
| O  | 2.35939900  | 3.26400400  | 0.30785200  |
| O  | 4.51359800  | -0.90196300 | -0.64536800 |
| P  | 0.98027600  | 2.31421600  | 0.47856100  |
| P  | 2.98780500  | -1.55333900 | -0.36620200 |
| C  | 0.55401400  | 2.64793800  | 2.29482000  |
| C  | -0.17154200 | 3.18150500  | -0.75602700 |
| C  | 3.33077400  | -2.63078200 | 1.15570500  |
| C  | 2.77010800  | -2.53456300 | -1.97563700 |
| H  | -2.42605000 | -1.94655800 | -2.07921100 |
| C  | -1.86877300 | -1.08446000 | -2.46241600 |
| O  | -0.76243400 | -0.79012200 | -1.67083600 |
| O  | -2.73359000 | 0.04984700  | -2.56117500 |
| C  | -6.77641000 | -1.09485600 | -0.16304400 |
| C  | -5.76059300 | -0.45796300 | -0.85231900 |
| C  | -5.81822800 | 0.90323400  | -1.16672600 |
| C  | -6.89930900 | 1.68973800  | -0.81081400 |
| C  | -7.93962500 | 1.05436700  | -0.11301800 |
| C  | -7.87911800 | -0.30622200 | 0.20427200  |
| H  | -6.71416400 | -2.14968700 | 0.08198500  |
| H  | -6.93465600 | 2.74476500  | -1.06169300 |
| H  | -8.80760400 | 1.63512200  | 0.18568400  |
| H  | -8.70012900 | -0.76581600 | 0.74694900  |
| O  | -4.67381000 | 1.26635200  | -1.84487300 |
| O  | -4.58119400 | -0.98646900 | -1.33402200 |
| B  | -3.92278000 | 0.09223500  | -1.92948400 |
| H  | -1.51206000 | -1.28423600 | -3.47594400 |
| Ni | 1.71525000  | 0.24901300  | 0.01611500  |
| C  | 0.17595600  | 2.56489100  | -2.13159400 |
| H  | -0.05703800 | 1.49751600  | -2.16721800 |
| H  | -0.42246600 | 3.06756000  | -2.90216200 |
| H  | 1.23304700  | 2.70794400  | -2.38434500 |
| C  | -1.65156500 | 2.90742700  | -0.42688500 |
| H  | -1.97878500 | 3.46183200  | 0.45936300  |
| H  | -2.26950300 | 3.24125300  | -1.26898100 |
| H  | -1.86184700 | 1.84732400  | -0.27043500 |
| C  | 0.08409000  | 4.70169300  | -0.81951600 |
| H  | -0.55551200 | 5.12115400  | -1.60670500 |
| H  | -0.16553600 | 5.21266100  | 0.11331100  |
| H  | 1.12348700  | 4.92913200  | -1.06849200 |
| C  | 0.26947700  | 4.13524900  | 2.57748300  |
| H  | -0.66628700 | 4.47098700  | 2.12171800  |
| H  | 0.17385100  | 4.27790300  | 3.66180000  |
| H  | 1.08188400  | 4.77886000  | 2.22593600  |
| C  | -0.64301000 | 1.77827200  | 2.72595800  |
| H  | -0.82339200 | 1.93583000  | 3.79720700  |
| H  | -1.56186000 | 2.02866200  | 2.19170100  |
| H  | -0.44941400 | 0.71333800  | 2.57096800  |
| C  | 1.79634000  | 2.21687300  | 3.10743100  |
| H  | 2.03424100  | 1.15904600  | 2.95385700  |
| H  | 2.68020800  | 2.80881500  | 2.85296500  |
| H  | 1.58569300  | 2.36083700  | 4.17475400  |
| C  | 3.92413500  | -1.68147100 | 2.22156000  |
| H  | 4.88699200  | -1.26664000 | 1.91000400  |
| H  | 3.25038400  | -0.84813200 | 2.44639600  |
| H  | 4.08016100  | -2.24736000 | 3.14864200  |
| C  | 2.00705500  | -3.21383700 | 1.69001900  |

|   |             |             |             |
|---|-------------|-------------|-------------|
| H | 2.21979600  | -3.79196300 | 2.59867800  |
| H | 1.29016200  | -2.43024600 | 1.95064400  |
| H | 1.51840600  | -3.88008800 | 0.97548900  |
| C | 4.34102600  | -3.76189500 | 0.88547800  |
| H | 4.59355200  | -4.24539200 | 1.83818700  |
| H | 3.93128700  | -4.53439600 | 0.22824900  |
| H | 5.26990300  | -3.38375800 | 0.44723000  |
| C | 1.70154200  | -3.63407700 | -1.82484200 |
| H | 1.49449600  | -4.05533800 | -2.81719300 |
| H | 2.05050300  | -4.45674600 | -1.19187800 |
| H | 0.75941200  | -3.26054600 | -1.41669700 |
| C | 4.09605600  | -3.15139100 | -2.46813300 |
| H | 4.46621400  | -3.94009500 | -1.80950800 |
| H | 3.91778500  | -3.60194700 | -3.45308700 |
| H | 4.87912400  | -2.39717500 | -2.57635400 |
| C | 2.29727200  | -1.49053100 | -3.01495300 |
| H | 1.32550600  | -1.06763800 | -2.74609300 |
| H | 3.02031700  | -0.67452300 | -3.12662900 |
| H | 2.20163000  | -1.98382800 | -3.99134100 |
| C | -2.04321600 | -3.64707500 | 1.95035800  |
| C | -1.74655900 | -2.54237100 | 1.16884100  |
| C | -2.39447100 | -1.31273500 | 1.36358600  |
| C | -3.36025800 | -1.14971300 | 2.34260000  |
| C | -3.66650900 | -2.26678500 | 3.14069600  |
| C | -3.02136200 | -3.48960500 | 2.94882500  |
| H | -1.54261800 | -4.59668000 | 1.78743200  |
| H | -3.86397500 | -0.19761100 | 2.47750100  |
| H | -4.41910400 | -2.17170700 | 3.91857300  |
| H | -3.27640600 | -4.33702700 | 3.57930000  |
| O | -1.93182200 | -0.39369200 | 0.46386800  |
| O | -0.85637100 | -2.44440900 | 0.13841800  |
| B | -0.84224600 | -1.04010400 | -0.26744700 |
| H | 0.31371200  | -0.51648200 | 0.21726800  |

#### TSA1

|    | x           | y           | z           |
|----|-------------|-------------|-------------|
| C  | 1.10341100  | 3.73677000  | -0.33295600 |
| C  | 1.10758700  | 2.34579900  | -0.22457200 |
| C  | -0.06391600 | 1.58168400  | -0.13787300 |
| C  | -1.26807300 | 2.29924800  | -0.14884300 |
| C  | -1.32617600 | 3.68892100  | -0.25487300 |
| C  | -0.12656800 | 4.39792900  | -0.34880500 |
| H  | 2.04177500  | 4.27773300  | -0.39859400 |
| H  | -2.28738400 | 4.19247300  | -0.26228000 |
| H  | -0.15064300 | 5.48080900  | -0.43245000 |
| O  | -2.46011500 | 1.59510100  | -0.04948000 |
| O  | 2.33028100  | 1.69178400  | -0.19528200 |
| P  | -2.24141200 | -0.06792200 | 0.04760500  |
| P  | 2.20068700  | 0.02986300  | 0.01569300  |
| C  | -3.11257700 | -0.44386200 | 1.69020100  |
| C  | -3.19410900 | -0.62364500 | -1.49595000 |
| C  | 3.08918300  | -0.18772900 | 1.67820700  |
| C  | 3.17827000  | -0.58749600 | -1.48759100 |
| H  | -0.08144000 | -1.86525800 | 0.83196600  |
| Ni | -0.02055700 | -0.30262200 | 0.02071200  |
| C  | -2.25808100 | -0.29841700 | -2.68426300 |
| H  | -1.32985900 | -0.87057900 | -2.62428100 |
| H  | -2.77184100 | -0.56828800 | -3.61600500 |

|   |             |             |             |
|---|-------------|-------------|-------------|
| H | -2.01872200 | 0.76941100  | -2.73413600 |
| C | -4.51415500 | 0.15206800  | -1.68226200 |
| H | -4.93151300 | -0.11287400 | -2.66214000 |
| H | -5.26372800 | -0.10059000 | -0.92915500 |
| H | -4.35564800 | 1.23376300  | -1.66435600 |
| C | -3.45818500 | -2.14143600 | -1.46386100 |
| H | -3.87758300 | -2.44244900 | -2.43253500 |
| H | -2.53543900 | -2.70778800 | -1.31093800 |
| H | -4.18890500 | -2.41808000 | -0.69685500 |
| C | -4.59803700 | -0.03601000 | 1.69533200  |
| H | -5.21015000 | -0.70374800 | 1.08243100  |
| H | -4.97886000 | -0.09804200 | 2.72294400  |
| H | -4.74202200 | 0.99138300  | 1.34727600  |
| C | -2.97273500 | -1.93827100 | 2.04562600  |
| H | -3.41791100 | -2.10690700 | 3.03448700  |
| H | -3.49004800 | -2.59085500 | 1.33742000  |
| H | -1.92667700 | -2.25542200 | 2.09671400  |
| C | -2.35959700 | 0.39237200  | 2.75064000  |
| H | -1.29469500 | 0.13948000  | 2.78517200  |
| H | -2.45073400 | 1.46627300  | 2.56379000  |
| H | -2.78866200 | 0.18058800  | 3.73808300  |
| C | 2.21344400  | 0.57084100  | 2.70270800  |
| H | 2.12563000  | 1.63509700  | 2.46348700  |
| H | 1.20541900  | 0.14788700  | 2.76392300  |
| H | 2.67636200  | 0.48346200  | 3.69370300  |
| C | 3.15464200  | -1.67549600 | 2.08075300  |
| H | 3.47010000  | -1.73832300 | 3.13030200  |
| H | 2.19611000  | -2.19374800 | 1.98420300  |
| H | 3.88528800  | -2.23095700 | 1.48747300  |
| C | 4.50120000  | 0.42822800  | 1.67657500  |
| H | 4.88391700  | 0.44150300  | 2.70536200  |
| H | 5.20280000  | -0.15947100 | 1.07785300  |
| H | 4.49800800  | 1.45733900  | 1.30469900  |
| C | 4.41912600  | 0.28439600  | -1.77102200 |
| H | 4.87098400  | -0.05737000 | -2.71095000 |
| H | 4.15697900  | 1.33961700  | -1.88452100 |
| H | 5.18024300  | 0.20076100  | -0.99159200 |
| C | 3.59462800  | -2.06340600 | -1.31822700 |
| H | 3.96005700  | -2.43226500 | -2.28505800 |
| H | 4.41276900  | -2.17474000 | -0.59970100 |
| H | 2.76956100  | -2.71143600 | -1.00858300 |
| C | 2.20126000  | -0.46468600 | -2.68100500 |
| H | 1.34113100  | -1.12822900 | -2.56042500 |
| H | 1.84424700  | 0.56324100  | -2.81059000 |
| H | 2.73210000  | -0.74993700 | -3.59848200 |
| O | -0.12045600 | -2.38667000 | -1.16362400 |
| C | 0.23087800  | -2.69252700 | 0.00219000  |
| O | 0.82240800  | -3.63656700 | 0.50740500  |

**TSA2-1**

|    | x          | y           | z           |
|----|------------|-------------|-------------|
| Ni | 0.74557800 | -0.00004900 | 0.27384100  |
| P  | 0.96801100 | -2.26204800 | 0.00398400  |
| P  | 0.96846200 | 2.26190600  | 0.00395100  |
| O  | 0.11807000 | 0.00006200  | 2.34592000  |
| C  | 2.37901000 | -0.00022200 | -0.71778400 |
| O  | 2.46274600 | -2.39408100 | -0.74466100 |
| C  | 1.32140800 | -3.32527000 | 1.53804900  |

|   |             |             |             |
|---|-------------|-------------|-------------|
| C | -0.11925900 | -3.15490300 | -1.29027100 |
| O | 2.46313700  | 2.39362200  | -0.74487000 |
| C | 1.32225900  | 3.32501900  | 1.53800500  |
| C | -0.11874200 | 3.15501300  | -1.29017300 |
| C | -1.02830000 | 0.00016400  | 2.82058700  |
| C | 3.04650200  | -1.18268100 | -1.06618300 |
| C | 3.04669200  | 1.18209900  | -1.06628900 |
| C | 1.82465000  | -4.73322500 | 1.16335500  |
| C | 0.08583000  | -3.43739900 | 2.45249700  |
| C | 2.44034300  | -2.57690000 | 2.30057200  |
| C | -1.35519300 | -3.82049700 | -0.65543400 |
| C | 0.69483300  | -4.21054600 | -2.07038000 |
| C | -0.58223700 | -2.06653400 | -2.28494300 |
| C | 2.44108100  | 2.57636000  | 2.30040900  |
| C | 1.82581000  | 4.73285700  | 1.16328800  |
| C | 0.08679700  | 3.43743800  | 2.45257400  |
| C | -0.58195400 | 2.06676700  | -2.28487200 |
| C | 0.69545600  | 4.21057100  | -2.07028700 |
| C | -1.35452800 | 3.82076500  | -0.65521300 |
| O | -2.14935000 | 0.00022300  | 2.18996600  |
| H | -1.15187900 | 0.00021100  | 3.91476400  |
| C | 4.28017100  | -1.21220100 | -1.71807100 |
| C | 4.28036500  | 1.21136100  | -1.71818100 |
| H | 2.16793600  | -5.23728400 | 2.07624100  |
| H | 2.66592800  | -4.69397000 | 0.46548800  |
| H | 1.03487200  | -5.35295100 | 0.72844900  |
| H | 0.36446800  | -4.01059000 | 3.34633400  |
| H | -0.75153800 | -3.95345600 | 1.97846500  |
| H | -0.25694500 | -2.45690200 | 2.78518600  |
| H | 3.34938100  | -2.48431600 | 1.69892300  |
| H | 2.69166500  | -3.14689500 | 3.20446900  |
| H | 2.11995300  | -1.57741800 | 2.60885800  |
| H | -1.08252700 | -4.67653600 | -0.03059700 |
| H | -1.99177800 | -4.20111100 | -1.46488700 |
| H | -1.96078800 | -3.11937900 | -0.07543300 |
| H | 1.55419200  | -3.76990200 | -2.58079900 |
| H | 0.03571700  | -4.65161100 | -2.82907600 |
| H | 1.05713000  | -5.02293100 | -1.43609900 |
| H | -1.14256800 | -2.54737900 | -3.09721400 |
| H | 0.26420600  | -1.53467800 | -2.73309200 |
| H | -1.24178400 | -1.33803600 | -1.80833600 |
| H | 2.69264100  | 3.14628600  | 3.20428400  |
| H | 3.35003500  | 2.48354600  | 1.69866900  |
| H | 2.12046700  | 1.57695900  | 2.60872200  |
| H | 2.66699600  | 4.69341200  | 0.46532000  |
| H | 2.16932700  | 5.23680700  | 2.07614700  |
| H | 1.03613500  | 5.35279100  | 0.72849000  |
| H | 0.36566200  | 4.01055600  | 3.34638700  |
| H | -0.25617800 | 2.45702100  | 2.78528800  |
| H | -0.75049100 | 3.95370400  | 1.97862900  |
| H | -1.24161000 | 1.33836400  | -1.80827100 |
| H | 0.26437600  | 1.53478300  | -2.73308400 |
| H | -1.14223600 | 2.54774600  | -3.09709800 |
| H | 1.55472800  | 3.76982600  | -2.58076400 |
| H | 1.05789300  | 5.02288900  | -1.43600100 |
| H | 0.03636100  | 4.65175000  | -2.82893600 |
| H | -1.99111600 | 4.20151100  | -1.46460100 |
| H | -1.08168100 | 4.67673500  | -0.03036100 |

|   |             |             |             |
|---|-------------|-------------|-------------|
| H | -1.96018700 | 3.11971400  | -0.07519800 |
| H | 4.74003800  | -2.16566300 | -1.95662600 |
| C | 4.89134700  | -0.00048400 | -2.04130900 |
| H | 4.74038600  | 2.16472800  | -1.95682000 |
| H | 5.85182600  | -0.00058400 | -2.54889400 |
| H | -7.41142600 | -1.23569000 | -1.31255200 |
| C | -6.52655600 | -0.69687400 | -0.98463300 |
| C | -6.52644500 | 0.69785600  | -0.98466700 |
| C | -5.39693200 | -1.42337500 | -0.56343500 |
| C | -5.39670500 | 1.42419900  | -0.56350600 |
| H | -7.41122900 | 1.23679700  | -1.31261400 |
| C | -4.28981900 | -0.70160000 | -0.15129300 |
| H | -5.38821500 | -2.50918100 | -0.55692400 |
| C | -4.28970800 | 0.70226700  | -0.15132800 |
| H | -5.38781500 | 2.51000400  | -0.55705000 |
| O | -3.08384500 | -1.17387200 | 0.28473400  |
| O | -3.08365800 | 1.17437000  | 0.28467400  |
| B | -2.30035800 | 0.00019700  | 0.66729500  |
| H | -1.16566000 | 0.00009600  | 0.15655300  |

### TSA3-1

|    | x           | y           | z           |
|----|-------------|-------------|-------------|
| Ni | 0.65966500  | 0.00000000  | 0.02719400  |
| P  | 0.96119200  | 2.25720100  | -0.07675500 |
| P  | 0.96119700  | -2.25720000 | -0.07675500 |
| O  | -1.27108300 | -0.00000200 | 1.16844800  |
| C  | 2.54967600  | 0.00000300  | -0.15969400 |
| O  | 2.63016500  | 2.39623700  | -0.16711400 |
| C  | 0.47394900  | 3.12538900  | -1.70059700 |
| C  | 0.63968200  | 3.27655900  | 1.48897400  |
| O  | 2.63017100  | -2.39623100 | -0.16711700 |
| C  | 0.47395600  | -3.12539000 | -1.70059600 |
| C  | 0.63969300  | -3.27655700 | 1.48897500  |
| C  | -1.84182500 | -0.00000200 | 2.37669000  |
| C  | 3.29729000  | 1.18505200  | -0.21225000 |
| C  | 3.29729300  | -1.18504400 | -0.21225100 |
| C  | 1.37171200  | 4.34490300  | -1.99611000 |
| C  | -1.00741400 | 3.54940500  | -1.70354900 |
| C  | 0.70332600  | 2.07323800  | -2.81039400 |
| C  | -0.86915500 | 3.49777900  | 1.71959700  |
| C  | 1.36922900  | 4.63494500  | 1.46286500  |
| C  | 1.22168100  | 2.42230900  | 2.64153300  |
| C  | 0.70333600  | -2.07324100 | -2.81039500 |
| C  | 1.37171600  | -4.34490600 | -1.99610500 |
| C  | -1.00740900 | -3.54940300 | -1.70355000 |
| C  | 1.22168700  | -2.42230300 | 2.64153300  |
| C  | 1.36924600  | -4.63494000 | 1.46287000  |
| C  | -0.86914400 | -3.49778400 | 1.71959700  |
| O  | -1.21339300 | -0.00000100 | 3.41128900  |
| H  | -2.94342600 | -0.00000300 | 2.34310600  |
| C  | 4.68909300  | 1.21280400  | -0.30771600 |
| C  | 4.68909600  | -1.21279300 | -0.30771700 |
| H  | 1.12913300  | 4.71521300  | -3.00049200 |
| H  | 2.43323900  | 4.08553000  | -1.97626500 |
| H  | 1.20455300  | 5.16739800  | -1.29689700 |
| H  | -1.28176800 | 3.84214900  | -2.72545500 |
| H  | -1.18078200 | 4.41889900  | -1.06248200 |
| H  | -1.68680700 | 2.75113100  | -1.39103200 |



|   |             |             |             |
|---|-------------|-------------|-------------|
| H | 1.73708700  | 1.71195400  | -2.82863200 |
| H | 0.49271400  | 2.53517600  | -3.78344000 |
| H | 0.03850700  | 1.21276000  | -2.69511100 |
| H | -1.27279700 | 4.27197200  | 1.06184900  |
| H | -1.02095300 | 3.83142800  | 2.75359800  |
| H | -1.46018100 | 2.59248900  | 1.56914700  |
| H | 2.43060400  | 4.52602200  | 1.22306700  |
| H | 1.29247500  | 5.08923800  | 2.45903200  |
| H | 0.91828300  | 5.33479900  | 0.75378500  |
| H | 1.12679200  | 2.99055700  | 3.57561000  |
| H | 2.28463300  | 2.20675600  | 2.49084500  |
| H | 0.68341600  | 1.48010400  | 2.77393100  |
| H | 0.49272500  | -2.53518100 | -3.78344000 |
| H | 1.73709700  | -1.71195800 | -2.82863100 |
| H | 0.03851800  | -1.21276200 | -2.69511500 |
| H | 2.43324400  | -4.08553600 | -1.97625600 |
| H | 1.12913900  | -4.71521600 | -3.00048700 |
| H | 1.20455200  | -5.16740000 | -1.29689200 |
| H | -1.28176200 | -3.84214800 | -2.72545600 |
| H | -1.68680100 | -2.75112700 | -1.39103500 |
| H | -1.18078000 | -4.41889400 | -1.06248100 |
| H | 0.68341700  | -1.48010000 | 2.77393000  |
| H | 2.28463700  | -2.20674400 | 2.49084500  |
| H | 1.12680000  | -2.99054900 | 3.57561000  |
| H | 2.43062200  | -4.52601100 | 1.22307600  |
| H | 0.91830700  | -5.33479600 | 0.75378800  |
| H | 1.29248900  | -5.08923200 | 2.45903600  |
| H | -1.02094100 | -3.83143100 | 2.75359800  |
| H | -1.27278000 | -4.27198100 | 1.06185000  |
| H | -1.46017500 | -2.59249800 | 1.56914400  |
| H | 5.20757100  | 2.16539200  | -0.34200200 |
| C | 5.37752400  | 0.00000600  | -0.35401100 |
| H | 5.20757600  | -2.16538000 | -0.34200400 |
| H | 6.46136200  | 0.00000800  | -0.42725600 |
| H | -7.52799800 | 1.23606300  | -0.62664100 |
| C | -6.58759500 | 0.69775400  | -0.54681000 |
| C | -6.58759300 | -0.69776600 | -0.54681000 |
| C | -5.38743600 | 1.42445100  | -0.44505500 |
| C | -5.38743300 | -1.42446100 | -0.44505600 |
| H | -7.52799600 | -1.23607700 | -0.62664200 |
| C | -4.21018200 | 0.70169000  | -0.34617500 |
| H | -5.37634400 | 2.51013300  | -0.44288300 |
| C | -4.21018100 | -0.70169800 | -0.34617500 |
| H | -5.37633900 | -2.51014300 | -0.44288400 |
| O | -2.93174500 | 1.17420800  | -0.23748200 |
| O | -2.93174300 | -1.17421300 | -0.23748200 |
| B | -2.06089000 | -0.00000200 | -0.13402300 |
| H | -1.12474500 | -0.00000100 | -0.95763800 |

**TSA4-1**

|    | x           | y           | z           |
|----|-------------|-------------|-------------|
| Ni | 0.61746700  | 0.21896500  | 0.10057700  |
| P  | 1.84111200  | -1.63952400 | -0.04551000 |
| P  | -0.10363500 | 2.30452100  | -0.06498800 |
| O  | -2.34150800 | 0.28187800  | 3.67601500  |
| C  | 2.27633800  | 1.03878000  | -0.43721700 |
| O  | 3.34525900  | -1.09149400 | -0.58225800 |
| C  | 2.41510600  | -2.50804600 | 1.54338000  |

|   |             |             |             |
|---|-------------|-------------|-------------|
| C | 1.42463400  | -2.84514100 | -1.46032700 |
| O | 1.28960200  | 3.21131800  | -0.36085700 |
| C | -0.72611100 | 3.21558000  | 1.47725100  |
| C | -1.09786100 | 2.70123600  | -1.63317700 |
| C | -1.85389700 | -0.81721900 | 3.62669700  |
| C | 3.42684900  | 0.28806500  | -0.69843200 |
| C | 2.40949600  | 2.42398800  | -0.58443800 |
| C | 3.57076500  | -3.49470300 | 1.28952600  |
| C | 1.25468700  | -3.22782000 | 2.25426100  |
| C | 2.92008200  | -1.36309800 | 2.45337800  |
| C | 0.48065000  | -3.96948900 | -0.99468400 |
| C | 2.68568500  | -3.45835900 | -2.10236000 |
| C | 0.70145100  | -1.98322500 | -2.52061500 |
| C | 0.07339100  | 2.59901100  | 2.64828600  |
| C | -0.43066000 | 4.72957800  | 1.43480700  |
| C | -2.23241700 | 2.97853800  | 1.69582100  |
| C | -0.21108700 | 2.26192300  | -2.82107300 |
| C | -1.41701300 | 4.19988700  | -1.78763700 |
| C | -2.39458500 | 1.87200100  | -1.65498500 |
| O | -1.72229400 | -1.59819600 | 2.53737800  |
| H | -1.43369400 | -1.34322900 | 4.49770700  |
| C | 4.64822200  | 0.85376500  | -1.06910900 |
| C | 3.60265200  | 3.04813600  | -0.95224500 |
| H | 3.96924100  | -3.83144000 | 2.25571000  |
| H | 4.38786200  | -3.03015200 | 0.73050200  |
| H | 3.23747500  | -4.38626700 | 0.74886400  |
| H | 1.60552500  | -3.57009500 | 3.23709100  |
| H | 0.91098400  | -4.10919200 | 1.70750500  |
| H | 0.39524400  | -2.57339600 | 2.41246900  |
| H | 3.76345900  | -0.82725500 | 2.00801400  |
| H | 3.25563600  | -1.78941200 | 3.40769400  |
| H | 2.12806400  | -0.63686800 | 2.66725600  |
| H | 0.99616900  | -4.69675200 | -0.35953500 |
| H | 0.12222300  | -4.51268900 | -1.87943300 |
| H | -0.39442200 | -3.59167600 | -0.45937000 |
| H | 3.37104500  | -2.68994400 | -2.46686800 |
| H | 2.37489700  | -4.07521300 | -2.95589400 |
| H | 3.23512300  | -4.10412400 | -1.41272100 |
| H | 0.45240500  | -2.61031300 | -3.38697400 |
| H | 1.33385700  | -1.16160900 | -2.87516500 |
| H | -0.22796400 | -1.55832700 | -2.12773700 |
| H | -0.21842800 | 3.09629600  | 3.58200900  |
| H | 1.15257100  | 2.73569100  | 2.51565300  |
| H | -0.13549200 | 1.53220200  | 2.75917000  |
| H | 0.63070800  | 4.93074300  | 1.27128800  |
| H | -0.71680900 | 5.16157200  | 2.40260600  |
| H | -1.00163300 | 5.25032200  | 0.66289300  |
| H | -2.51317100 | 3.38797600  | 2.67432000  |
| H | -2.50025800 | 1.91967800  | 1.70488300  |
| H | -2.83610800 | 3.49435200  | 0.94157700  |
| H | 0.06754800  | 1.20570200  | -2.75276900 |
| H | 0.70615100  | 2.85388300  | -2.88640500 |
| H | -0.77493800 | 2.40386300  | -3.75210200 |
| H | -0.51702900 | 4.81716400  | -1.70651700 |
| H | -2.14843400 | 4.54695400  | -1.05187600 |
| H | -1.85073000 | 4.36913400  | -2.78211100 |
| H | -2.92951700 | 2.06915500  | -2.59329600 |
| H | -3.06797000 | 2.11957600  | -0.83068600 |

|   |             |             |             |
|---|-------------|-------------|-------------|
| H | -2.18850600 | 0.79951600  | -1.60731500 |
| H | 5.51059500  | 0.22157500  | -1.25527900 |
| C | 4.72032800  | 2.24389400  | -1.19019400 |
| H | 3.64796000  | 4.12803600  | -1.05079900 |
| H | 5.66066700  | 2.70711300  | -1.47688100 |
| H | -5.14129200 | -2.86111300 | -3.22462400 |
| C | -4.78252600 | -2.32806900 | -2.34893400 |
| C | -5.41992300 | -1.14874100 | -1.95091600 |
| C | -3.68858800 | -2.84372000 | -1.63495300 |
| C | -4.98875400 | -0.42947800 | -0.82432900 |
| H | -6.26747300 | -0.77984000 | -2.52121000 |
| C | -3.27437100 | -2.12748400 | -0.52485700 |
| H | -3.19445500 | -3.76415000 | -1.92821600 |
| C | -3.90528800 | -0.94299000 | -0.13271500 |
| H | -5.47910100 | 0.48354600  | -0.50331300 |
| O | -2.26267400 | -2.42045600 | 0.35868200  |
| O | -3.29418700 | -0.44830400 | 0.99762300  |
| B | -2.24567200 | -1.34115200 | 1.26199200  |
| H | -0.73793800 | -0.41000200 | 0.57729500  |

#### TSA5-1

|    | x           | y           | z           |
|----|-------------|-------------|-------------|
| Ni | 0.64387100  | 0.10973500  | -0.02014400 |
| P  | 0.44097100  | 2.29910100  | -0.13507600 |
| P  | 1.40212000  | -1.96617600 | -0.10490200 |
| O  | -1.84418400 | -0.86883000 | 2.45110400  |
| C  | 2.49633600  | 0.52587800  | -0.32693300 |
| O  | 2.01389000  | 2.86583500  | -0.36615000 |
| C  | -0.39757900 | 2.98314800  | -1.69197100 |
| C  | -0.00130000 | 3.25765500  | 1.44289500  |
| O  | 3.07004700  | -1.79330700 | -0.31059200 |
| C  | 0.97702000  | -2.93402500 | -1.68217300 |
| C  | 1.40415800  | -3.03942000 | 1.46463500  |
| C  | -2.16547400 | -0.10058900 | 3.52113000  |
| C  | 2.95018000  | 1.84250500  | -0.45921000 |
| C  | 3.47315900  | -0.47034900 | -0.43020300 |
| C  | -0.34863500 | 4.51883200  | -1.79108500 |
| C  | -1.85539800 | 2.48663700  | -1.76031500 |
| C  | 0.38330800  | 2.38273400  | -2.88349100 |
| C  | -1.52826100 | 3.35408500  | 1.62125500  |
| C  | 0.62365500  | 4.66727500  | 1.48429500  |
| C  | 0.60635400  | 2.42359600  | 2.59457300  |
| C  | 1.43658100  | -2.04167300 | -2.85770600 |
| C  | 1.70363000  | -4.28761000 | -1.77574200 |
| C  | -0.54728800 | -3.13136100 | -1.78382900 |
| C  | 1.54824600  | -2.03686300 | 2.63363000  |
| C  | 2.59791300  | -4.01632900 | 1.51064500  |
| C  | 0.08388000  | -3.81809700 | 1.61724700  |
| O  | -1.53874200 | -0.13241600 | 4.54472000  |
| H  | -3.05077300 | 0.53324400  | 3.35395900  |
| C  | 4.28739800  | 2.17617600  | -0.67838400 |
| C  | 4.82496600  | -0.19898400 | -0.64835000 |
| H  | -0.71064100 | 4.82438900  | -2.78160800 |
| H  | 0.67008600  | 4.90102300  | -1.67433300 |
| H  | -0.99112300 | 5.00118600  | -1.04837900 |
| H  | -2.29667300 | 2.80748200  | -2.71299300 |
| H  | -2.47564100 | 2.89133800  | -0.95593800 |
| H  | -1.91239000 | 1.39552800  | -1.71156000 |

|   |             |             |             |
|---|-------------|-------------|-------------|
| H | 1.42376000  | 2.71932700  | -2.90131400 |
| H | -0.09535100 | 2.70305400  | -3.81779100 |
| H | 0.37798100  | 1.28799200  | -2.86129300 |
| H | -1.97539100 | 4.06230600  | 0.91552200  |
| H | -1.74657800 | 3.72156600  | 2.63240400  |
| H | -2.03154400 | 2.39080900  | 1.49718100  |
| H | 1.70580800  | 4.63116100  | 1.33835600  |
| H | 0.42607200  | 5.10605000  | 2.47109900  |
| H | 0.19919000  | 5.33970800  | 0.73523300  |
| H | 0.40119300  | 2.92313600  | 3.55000600  |
| H | 1.69276100  | 2.32847600  | 2.49233300  |
| H | 0.18302400  | 1.41647200  | 2.64330600  |
| H | 1.16741100  | -2.53343000 | -3.80145300 |
| H | 2.51867300  | -1.88336100 | -2.85295100 |
| H | 0.94790500  | -1.06201800 | -2.83747000 |
| H | 2.78276100  | -4.17874400 | -1.63084300 |
| H | 1.54011400  | -4.71302300 | -2.77480700 |
| H | 1.32326600  | -5.01105900 | -1.04875800 |
| H | -0.77739900 | -3.62665300 | -2.73662400 |
| H | -1.07668900 | -2.17502000 | -1.76103300 |
| H | -0.94819200 | -3.75253000 | -0.97907000 |
| H | 0.68054400  | -1.37787100 | 2.71499400  |
| H | 2.44958700  | -1.42238700 | 2.53088300  |
| H | 1.63207400  | -2.59668700 | 3.57409900  |
| H | 3.55132700  | -3.49384900 | 1.40335900  |
| H | 2.54314600  | -4.79077500 | 0.74195300  |
| H | 2.59219600  | -4.52010300 | 2.48606500  |
| H | 0.05769700  | -4.27247500 | 2.61602000  |
| H | 0.00028400  | -4.63111900 | 0.88825200  |
| H | -0.79636600 | -3.17780600 | 1.52630300  |
| H | 4.58567400  | 3.21542600  | -0.77324000 |
| C | 5.21758200  | 1.13685800  | -0.76953800 |
| H | 5.54251400  | -1.01014400 | -0.71995900 |
| H | 6.26504600  | 1.37180100  | -0.93870600 |
| H | -6.42280100 | 0.34433800  | -2.51867800 |
| C | -5.65964200 | -0.14959300 | -1.92451200 |
| C | -5.33093500 | -1.48151200 | -2.19407900 |
| C | -5.02308100 | 0.56580000  | -0.89706500 |
| C | -4.35274400 | -2.15912500 | -1.44851500 |
| H | -5.84313600 | -2.00715800 | -2.99464100 |
| C | -4.06022600 | -0.11210800 | -0.17106300 |
| H | -5.27308100 | 1.59816300  | -0.67585800 |
| C | -3.73256000 | -1.44527100 | -0.43746600 |
| H | -4.09636100 | -3.19492500 | -1.64434800 |
| O | -3.30028400 | 0.34211900  | 0.88761300  |
| O | -2.76899100 | -1.86982300 | 0.44862700  |
| B | -2.45597700 | -0.73490400 | 1.20884800  |
| H | -0.85617100 | -0.21300900 | 0.24716100  |

**TSA6-1**

|   | x           | y           | z           |
|---|-------------|-------------|-------------|
| C | -1.04561800 | -0.76187600 | -0.01904500 |
| C | -0.80193200 | 0.60980900  | 0.07470900  |
| C | -1.82380900 | 1.54050000  | 0.06810400  |
| C | -3.12890500 | 1.03464100  | -0.03744200 |
| C | -3.37386300 | -0.33916700 | -0.13121400 |
| C | -2.32596800 | -1.27291100 | -0.12396500 |
| H | -1.62092100 | 2.60364500  | 0.13995600  |

|   |             |             |             |
|---|-------------|-------------|-------------|
| H | -3.96447000 | 1.72810200  | -0.04699800 |
| H | -4.39672000 | -0.69470400 | -0.21212100 |
| H | -2.50339900 | -2.34050800 | -0.19694800 |
| O | 0.56467700  | 0.82318200  | 0.16753500  |
| O | 0.15802200  | -1.44535000 | 0.01207300  |
| B | 1.11404700  | -0.45104700 | 0.12339600  |
| O | 2.44440700  | -0.72522000 | 0.19946600  |
| C | 3.44209600  | 0.21739000  | 0.28156200  |
| H | 3.66197600  | 0.47939300  | 1.32770200  |
| O | 4.03305400  | 0.63601200  | -0.66717600 |

**TSB1-1**

|    | x           | y           | z           |
|----|-------------|-------------|-------------|
| C  | 4.78046900  | -0.15331400 | -1.54591900 |
| C  | 3.55552600  | -0.45434300 | -0.95011000 |
| C  | 2.61189500  | 0.51949100  | -0.59643100 |
| C  | 2.94892200  | 1.84039100  | -0.92030000 |
| C  | 4.16050600  | 2.19572500  | -1.51471200 |
| C  | 5.07380100  | 1.18438900  | -1.81856200 |
| H  | 5.47568100  | -0.95037000 | -1.78871100 |
| H  | 4.36920900  | 3.23727500  | -1.73660000 |
| H  | 6.02272300  | 1.44097800  | -2.28119700 |
| O  | 2.03268100  | 2.84354200  | -0.65300800 |
| O  | 3.25714100  | -1.78698900 | -0.70282500 |
| P  | 0.56687000  | 2.28496100  | -0.04712800 |
| P  | 1.76706800  | -2.00875400 | 0.03719800  |
| C  | 0.44665900  | 3.37161500  | 1.50562800  |
| C  | -0.61472500 | 2.79705200  | -1.44144200 |
| C  | 2.34298700  | -2.82468500 | 1.65416200  |
| C  | 0.92989000  | -3.17546600 | -1.20087400 |
| H  | -1.26445600 | -1.61403800 | 1.58418200  |
| C  | -0.94091600 | -0.55659600 | 1.64731200  |
| O  | -0.05882300 | -0.22435200 | 2.49276600  |
| O  | -2.20011500 | 0.24164800  | 1.71832800  |
| C  | -5.30144000 | -2.08266100 | -1.17801900 |
| C  | -4.68780200 | -1.21799300 | -0.28996300 |
| C  | -5.37095800 | -0.14814000 | 0.29604700  |
| C  | -6.70319400 | 0.10401800  | 0.01928100  |
| C  | -7.33828900 | -0.76656100 | -0.88142900 |
| C  | -6.65360200 | -1.83570900 | -1.46725700 |
| H  | -4.75981000 | -2.91011900 | -1.62468600 |
| H  | -7.22542500 | 0.93558100  | 0.48071200  |
| H  | -8.38410400 | -0.60369900 | -1.12530900 |
| H  | -7.17490500 | -2.49065700 | -2.15931400 |
| O  | -4.52019000 | 0.54032100  | 1.13131700  |
| O  | -3.38448700 | -1.22776700 | 0.16454700  |
| B  | -3.29782900 | -0.13661100 | 1.04857700  |
| H  | -0.66295100 | -0.34593100 | 0.43164000  |
| Ni | 0.92915200  | 0.06743200  | 0.15526100  |
| C  | -0.04705800 | 2.16490300  | -2.73237400 |
| H  | 0.06819900  | 1.07994800  | -2.63813700 |
| H  | -0.74399300 | 2.35979200  | -3.55740700 |
| H  | 0.92445300  | 2.58965400  | -3.00035700 |
| C  | -2.01354700 | 2.20590700  | -1.17492600 |
| H  | -2.46002400 | 2.56863400  | -0.24537900 |
| H  | -2.68104600 | 2.48971400  | -1.99874300 |
| H  | -1.98227100 | 1.11235800  | -1.13579900 |
| C  | -0.71214400 | 4.32098900  | -1.63774500 |

|   |             |             |             |
|---|-------------|-------------|-------------|
| H | -1.28909000 | 4.52521700  | -2.54921500 |
| H | -1.22995400 | 4.81072600  | -0.80830400 |
| H | 0.27393100  | 4.78035000  | -1.75695600 |
| C | 0.94857000  | 4.80888500  | 1.25326500  |
| H | 0.28814200  | 5.38398300  | 0.60091200  |
| H | 0.98512400  | 5.32666500  | 2.22029500  |
| H | 1.95486800  | 4.82045800  | 0.82709300  |
| C | -0.99181000 | 3.39789000  | 2.05625200  |
| H | -0.98449400 | 3.92721200  | 3.01784800  |
| H | -1.67598500 | 3.94044600  | 1.39430500  |
| H | -1.38830500 | 2.39480200  | 2.23083900  |
| C | 1.37845700  | 2.69704100  | 2.54009800  |
| H | 1.02249400  | 1.69587200  | 2.79491700  |
| H | 2.40915800  | 2.63134600  | 2.17239100  |
| H | 1.38931600  | 3.31187000  | 3.44966200  |
| C | 2.98943000  | -1.67610500 | 2.46612200  |
| H | 3.84251500  | -1.23503700 | 1.93999700  |
| H | 2.26013700  | -0.89474300 | 2.69329400  |
| H | 3.35985300  | -2.08876900 | 3.41366500  |
| C | 1.15644100  | -3.39018100 | 2.45615400  |
| H | 1.53715300  | -3.77900000 | 3.40950500  |
| H | 0.42964700  | -2.60820900 | 2.68942200  |
| H | 0.66014600  | -4.22172100 | 1.94484900  |
| C | 3.40245000  | -3.91887400 | 1.41206500  |
| H | 3.82867600  | -4.20303500 | 2.38265900  |
| H | 2.98277400  | -4.82276400 | 0.96457400  |
| H | 4.21827200  | -3.56153500 | 0.77776100  |
| C | -0.51244000 | -3.48474900 | -0.75095200 |
| H | -0.99613500 | -4.09707900 | -1.52320700 |
| H | -0.54874900 | -4.05360000 | 0.18275000  |
| H | -1.11594000 | -2.58032800 | -0.62600400 |
| C | 1.70307100  | -4.48664200 | -1.43710000 |
| H | 1.63457500  | -5.16435300 | -0.58176800 |
| H | 1.26397200  | -5.00564000 | -2.29902900 |
| H | 2.75943600  | -4.30600900 | -1.65839800 |
| C | 0.87588500  | -2.38304000 | -2.52773400 |
| H | 0.33173900  | -1.43959600 | -2.41309700 |
| H | 1.87612600  | -2.15887300 | -2.90988500 |
| H | 0.35129900  | -2.98658200 | -3.27924000 |

#### TSB2-1

|    | x           | y           | z           |
|----|-------------|-------------|-------------|
| Ni | -0.77945600 | 0.00004200  | 0.22102900  |
| P  | -1.05586700 | 2.24571700  | 0.05182700  |
| P  | -1.05649300 | -2.24555400 | 0.05184300  |
| C  | -2.24172600 | 0.00023300  | -1.00108500 |
| O  | -2.30744300 | 2.39928600  | -1.05607700 |
| C  | -1.82536800 | 3.12951700  | 1.54571500  |
| C  | 0.27486200  | 3.25595600  | -0.85037200 |
| O  | -2.30818500 | -2.39880800 | -1.05596800 |
| C  | -1.82603100 | -3.12924400 | 1.54575400  |
| C  | 0.27396700  | -3.25602400 | -0.85048700 |
| C  | -2.81410500 | 1.18426900  | -1.49061900 |
| C  | -2.81447800 | -1.18365000 | -1.49055900 |
| C  | -2.34559600 | 4.53990900  | 1.20918000  |
| C  | -0.83232900 | 3.18869000  | 2.72270100  |
| C  | -3.01962600 | 2.23718800  | 1.95920800  |
| C  | 1.47387700  | 3.54082900  | 0.07505100  |

|   |             |             |             |
|---|-------------|-------------|-------------|
| C | -0.26368700 | 4.57523700  | -1.43998900 |
| C | 0.72662600  | 2.35479400  | -2.02429300 |
| C | -3.02027100 | -2.23686900 | 1.95920400  |
| C | -2.34627400 | -4.53964600 | 1.20929700  |
| C | -0.83298500 | -3.18835600 | 2.72273900  |
| C | 0.72594600  | -2.35482500 | -2.02429100 |
| C | -0.26490800 | -4.57509900 | -1.44026900 |
| C | 1.47288200  | -3.54129700 | 0.07494300  |
| C | -3.87282800 | 1.21290200  | -2.39925800 |
| C | -3.87320900 | -1.21199800 | -2.39919600 |
| H | -2.97113800 | 4.88835000  | 2.04137500  |
| H | -2.95807900 | 4.55019000  | 0.30269500  |
| H | -1.53287600 | 5.26243800  | 1.09368300  |
| H | -1.34463600 | 3.62997000  | 3.58802300  |
| H | 0.03877200  | 3.81505800  | 2.50872600  |
| H | -0.50677300 | 2.18249300  | 2.99745900  |
| H | -3.77036800 | 2.16157300  | 1.16634900  |
| H | -3.50180400 | 2.68537200  | 2.83763200  |
| H | -2.68569700 | 1.23276800  | 2.23171100  |
| H | 1.24524200  | 4.31584100  | 0.81299600  |
| H | 2.31517700  | 3.90345400  | -0.52910900 |
| H | 1.80889000  | 2.64690000  | 0.60899100  |
| H | -1.16456400 | 4.41229600  | -2.03776700 |
| H | 0.50542400  | 5.00212800  | -2.09687000 |
| H | -0.48602700 | 5.32044800  | -0.67323300 |
| H | 1.47423800  | 2.89838400  | -2.61663500 |
| H | -0.10893000 | 2.10888400  | -2.68804500 |
| H | 1.18628600  | 1.42526000  | -1.68245500 |
| H | -3.50239100 | -2.68494000 | 2.83771600  |
| H | -3.77105600 | -2.16135400 | 1.16637700  |
| H | -2.68633800 | -1.23240800 | 2.23155600  |
| H | -2.95880700 | -4.54995700 | 0.30284500  |
| H | -2.97176600 | -4.88806700 | 2.04153700  |
| H | -1.53355100 | -5.26216900 | 1.09377300  |
| H | -1.34525100 | -3.62969900 | 3.58805400  |
| H | -0.50751800 | -2.18213000 | 2.99750200  |
| H | 0.03817500  | -3.81463700 | 2.50875200  |
| H | 1.18582800  | -1.42544600 | -1.68233800 |
| H | -0.10955700 | -2.10862900 | -2.68800700 |
| H | 1.47342300  | -2.89851900 | -2.61670900 |
| H | -1.16579000 | -4.41188000 | -2.03796100 |
| H | -0.48736000 | -5.32037300 | -0.67360600 |
| H | 0.50406700  | -5.00205900 | -2.09726300 |
| H | 2.31419300  | -3.90386200 | -0.52923900 |
| H | 1.24408300  | -4.31648000 | 0.81266000  |
| H | 1.80793800  | -2.64754600 | 0.60915000  |
| H | -4.26750300 | 2.16584700  | -2.73656500 |
| C | -4.39670700 | 0.00052300  | -2.84971800 |
| H | -4.26818000 | -2.16483600 | -2.73645900 |
| H | -5.22124700 | 0.00063500  | -3.55717200 |
| H | 1.44917400  | -0.91696700 | 2.84474600  |
| H | 7.48190200  | -0.00066100 | -2.26024500 |
| C | 6.72624500  | -0.00056700 | -1.47997800 |
| C | 7.12023100  | -0.00038900 | -0.13872900 |
| C | 5.36881700  | -0.00062700 | -1.84204600 |
| C | 6.17511600  | -0.00026400 | 0.90069500  |
| H | 8.17796700  | -0.00034700 | 0.10835400  |
| C | 4.44758500  | -0.00050300 | -0.80982400 |

|   |             |             |             |
|---|-------------|-------------|-------------|
| H | 5.05092300  | -0.00076500 | -2.87968500 |
| C | 4.84127600  | -0.00032500 | 0.53243300  |
| H | 6.46981800  | -0.00012600 | 1.94503700  |
| O | 3.07266700  | -0.00052500 | -0.88208400 |
| O | 3.72564200  | -0.00023200 | 1.33766500  |
| B | 2.62331900  | -0.00035900 | 0.45672700  |
| O | 1.34850600  | -0.00033000 | 0.83841800  |
| C | 0.90551900  | -0.00013400 | 2.55391000  |
| H | 1.44949100  | 0.91654400  | 2.84464000  |
| O | -0.36333600 | 0.00008300  | 2.54164800  |

**TSB3-1**

|    | x           | y           | z           |
|----|-------------|-------------|-------------|
| Ni | 1.14689800  | -0.00019000 | -0.04298200 |
| P  | 1.48399600  | 2.26056300  | -0.05947700 |
| P  | 1.48177900  | -2.26122500 | -0.06086200 |
| C  | 2.94613000  | -0.00125200 | 0.56023400  |
| O  | 3.02919500  | 2.39575500  | 0.57977300  |
| C  | 1.74961100  | 3.10172200  | -1.75028100 |
| C  | 0.53454200  | 3.33206300  | 1.18385700  |
| O  | 3.02663700  | -2.39833900 | 0.57882300  |
| C  | 1.74717200  | -3.10127500 | -1.75228000 |
| C  | 0.53112100  | -3.33298500 | 1.18135800  |
| C  | 3.64707900  | 1.18322000  | 0.82987800  |
| C  | 3.64581900  | -1.18657000 | 0.82942400  |
| C  | 2.75881000  | 4.26563000  | -1.65621500 |
| C  | 0.42230200  | 3.60133300  | -2.35324800 |
| C  | 2.35026100  | 2.01605300  | -2.67210000 |
| C  | -0.94812600 | 3.47537800  | 0.78292400  |
| C  | 1.16265500  | 4.72807300  | 1.36497000  |
| C  | 0.63510900  | 2.56656700  | 2.52495800  |
| C  | 2.34854100  | -2.01528000 | -2.67324700 |
| C  | 2.75572600  | -4.26580000 | -1.65890900 |
| C  | 0.41967400  | -3.59969000 | -2.35580300 |
| C  | 0.63219000  | -2.56880500 | 2.52316900  |
| C  | 1.15801800  | -4.72970600 | 1.36123600  |
| C  | -0.95162300 | -3.47473500 | 0.78017200  |
| C  | 4.94547700  | 1.21028000  | 1.34034100  |
| C  | 4.94418900  | -1.21521200 | 1.33987600  |
| H  | 2.94379600  | 4.64037700  | -2.67114500 |
| H  | 3.71377800  | 3.94518400  | -1.23252000 |
| H  | 2.38430400  | 5.10200100  | -1.06217000 |
| H  | 0.60224900  | 3.88556000  | -3.39820200 |
| H  | 0.05437700  | 4.49336100  | -1.83667000 |
| H  | -0.36655700 | 2.84299700  | -2.34543600 |
| H  | 3.27367700  | 1.59228500  | -2.26267600 |
| H  | 2.59281600  | 2.47192500  | -3.64067200 |
| H  | 1.64380400  | 1.20136800  | -2.85003600 |
| H  | -1.08298800 | 4.16556500  | -0.05310700 |
| H  | -1.50564500 | 3.87916100  | 1.63749100  |
| H  | -1.40484300 | 2.52592400  | 0.49813800  |
| H  | 2.23503900  | 4.67164100  | 1.57336500  |
| H  | 0.67876900  | 5.22086300  | 2.21815600  |
| H  | 1.00582800  | 5.36708200  | 0.49134600  |
| H  | 0.11723500  | 3.14892900  | 3.29778600  |
| H  | 1.67467200  | 2.43911200  | 2.84277600  |
| H  | 0.15896900  | 1.58374000  | 2.47780400  |
| H  | 2.59110700  | -2.47063300 | -3.64206100 |



|   |             |             |             |
|---|-------------|-------------|-------------|
| H | 3.27205100  | -1.59218100 | -2.26334700 |
| H | 1.64248600  | -1.20016400 | -2.85080600 |
| H | 3.71088200  | -3.94611500 | -1.23506200 |
| H | 2.94046800  | -4.64006900 | -2.67406100 |
| H | 2.38079900  | -5.10230100 | -1.06531300 |
| H | 0.59959700  | -3.88322100 | -3.40094900 |
| H | -0.36873100 | -2.84088500 | -2.34751000 |
| H | 0.05116800  | -4.49189900 | -1.83995100 |
| H | 0.15719700  | -1.58538500 | 2.47676200  |
| H | 1.67181500  | -2.44282400 | 2.84136500  |
| H | 0.11344800  | -3.15126500 | 3.29534100  |
| H | 2.23045600  | -4.67439600 | 1.56963700  |
| H | 1.00059800  | -5.36779800 | 0.48704500  |
| H | 0.67372500  | -5.22281800 | 2.21400300  |
| H | -1.50938600 | -3.87946900 | 1.63413300  |
| H | -1.08692500 | -4.16356400 | -0.05690300 |
| H | -1.40779500 | -2.52459400 | 0.49681600  |
| H | 5.43008800  | 2.16261000  | 1.52920300  |
| C | 5.58654800  | -0.00285500 | 1.59397500  |
| H | 5.42779300  | -2.16812900 | 1.52835500  |
| H | 6.59758400  | -0.00346600 | 1.99142300  |
| H | -5.05320200 | -0.00078500 | 5.63987000  |
| C | -4.74415700 | -0.00060700 | 4.59863300  |
| C | -5.71503000 | -0.00086100 | 3.59190200  |
| C | -3.37344400 | -0.00012500 | 4.29243500  |
| C | -5.36144500 | -0.00064400 | 2.23294500  |
| H | -6.76651200 | -0.00123300 | 3.86405300  |
| C | -3.03865100 | 0.00008500  | 2.95046700  |
| H | -2.61134000 | 0.00007500  | 5.06495500  |
| C | -4.00844100 | -0.00016900 | 1.94406800  |
| H | -6.10429300 | -0.00083400 | 1.44240400  |
| O | -1.78545700 | 0.00055000  | 2.37041800  |
| O | -3.39023300 | 0.00011500  | 0.71320000  |
| B | -2.02253800 | 0.00057300  | 0.98687400  |
| O | -1.02993600 | 0.00094700  | 0.08083300  |
| H | -5.81699500 | -1.23335800 | -4.36216200 |
| C | -5.01946300 | -0.69464800 | -3.85738700 |
| C | -5.01911700 | 0.70031600  | -3.85704400 |
| C | -3.99978400 | -1.42094000 | -3.21436600 |
| C | -3.99907900 | 1.42578800  | -3.21366700 |
| H | -5.81638300 | 1.23966600  | -4.36155500 |
| C | -2.99975800 | -0.69986000 | -2.58470300 |
| H | -3.99122000 | -2.50683800 | -3.20749900 |
| C | -2.99941000 | 0.70390500  | -2.58435700 |
| H | -3.98997400 | 2.51167800  | -3.20626900 |
| O | -1.91244700 | -1.17385400 | -1.90810500 |
| O | -1.91187600 | 1.17703000  | -1.90750700 |
| B | -1.17156700 | 0.00128800  | -1.43400100 |
| H | 0.01520900  | 0.00105900  | -1.80070800 |

**TSB4-1**

|    | x           | y           | z           |
|----|-------------|-------------|-------------|
| Ni | -1.38268300 | -0.18455100 | -0.15264100 |
| P  | -2.09628200 | 1.72117900  | -1.02039900 |
| P  | -1.17506000 | -2.29803900 | 0.46621800  |
| C  | -3.14247700 | -0.77514200 | -0.65449300 |
| O  | -3.68078800 | 1.39162200  | -1.50289600 |
| C  | -2.43080000 | 3.20265900  | 0.12878000  |

|   |             |             |             |
|---|-------------|-------------|-------------|
| C | -1.35070600 | 2.22424500  | -2.68894500 |
| O | -2.68802800 | -2.97788600 | 0.14993400  |
| C | -1.03338100 | -2.72379100 | 2.31471800  |
| C | -0.08550900 | -3.39168000 | -0.63550600 |
| C | -4.06652200 | 0.08007400  | -1.26395300 |
| C | -3.57405000 | -2.08898200 | -0.44366300 |
| C | -3.67843800 | 4.00339900  | -0.29888000 |
| C | -1.21527600 | 4.14428500  | 0.21512800  |
| C | -2.69620700 | 2.58078700  | 1.51915000  |
| C | 0.14508600  | 2.56258600  | -2.53631900 |
| C | -2.10405000 | 3.39361700  | -3.35062000 |
| C | -1.48163900 | 0.97448500  | -3.59029400 |
| C | -1.71096500 | -1.54540700 | 3.05147600  |
| C | -1.78238500 | -4.02318800 | 2.67609300  |
| C | 0.43641300  | -2.82931100 | 2.76291500  |
| C | -0.61850700 | -3.19610200 | -2.07357700 |
| C | -0.17160100 | -4.88667800 | -0.27642300 |
| C | 1.37564700  | -2.90377200 | -0.58421300 |
| C | -5.34932200 | -0.31948500 | -1.64277300 |
| C | -4.84322000 | -2.54740900 | -0.80054100 |
| H | -3.84795800 | 4.79838600  | 0.43929200  |
| H | -4.57118800 | 3.37528500  | -0.33627300 |
| H | -3.55752400 | 4.47987400  | -1.27514400 |
| H | -1.38568800 | 4.86252000  | 1.02841700  |
| H | -1.08233500 | 4.72516500  | -0.70317800 |
| H | -0.28590300 | 3.61087600  | 0.42861100  |
| H | -3.52858000 | 1.86883500  | 1.49214400  |
| H | -2.95995400 | 3.37790000  | 2.22666600  |
| H | -1.81322600 | 2.06287800  | 1.90622100  |
| H | 0.31420600  | 3.46470000  | -1.94334900 |
| H | 0.56834400  | 2.74056800  | -3.53377800 |
| H | 0.70457100  | 1.74394200  | -2.07664500 |
| H | -3.17817000 | 3.19625100  | -3.41959100 |
| H | -1.72094300 | 3.53338800  | -4.37001100 |
| H | -1.95473800 | 4.33669600  | -2.81639400 |
| H | -1.05109300 | 1.20225900  | -4.57384500 |
| H | -2.52519600 | 0.68042600  | -3.73564800 |
| H | -0.93667700 | 0.11979500  | -3.17590400 |
| H | -1.70405600 | -1.74415000 | 4.13122600  |
| H | -2.75427400 | -1.42090700 | 2.74094100  |
| H | -1.18552900 | -0.60157700 | 2.87699300  |
| H | -2.83838900 | -3.97178000 | 2.40182500  |
| H | -1.71643700 | -4.16978700 | 3.76229400  |
| H | -1.34961600 | -4.90498500 | 2.19727400  |
| H | 0.46482100  | -2.88875300 | 3.85915300  |
| H | 1.03137100  | -1.96471000 | 2.45928400  |
| H | 0.91671100  | -3.73528600 | 2.37950700  |
| H | -0.58568500 | -2.14527900 | -2.37940500 |
| H | -1.64739600 | -3.55162600 | -2.18033000 |
| H | 0.01340800  | -3.76783000 | -2.76521900 |
| H | -1.20769900 | -5.23880000 | -0.25840100 |
| H | 0.29025400  | -5.10954300 | 0.69000400  |
| H | 0.36730100  | -5.46792800 | -1.03623800 |
| H | 1.96948900  | -3.48791600 | -1.29933900 |
| H | 1.82910300  | -3.03099000 | 0.40237300  |
| H | 1.45547100  | -1.84942500 | -0.86226500 |
| H | -6.02732300 | 0.38612400  | -2.11226200 |
| C | -5.72425700 | -1.64392300 | -1.40106900 |

|   |             |             |             |
|---|-------------|-------------|-------------|
| H | -5.12671000 | -3.57838300 | -0.61407500 |
| H | -6.71814600 | -1.97784700 | -1.68698000 |
| H | 8.28748100  | -1.04499800 | -3.40129800 |
| C | 7.56331800  | -0.73770800 | -2.65246200 |
| C | 7.99878400  | -0.43088800 | -1.35918700 |
| C | 6.20689900  | -0.65673900 | -3.00670400 |
| C | 7.09785400  | -0.02886700 | -0.35989700 |
| H | 9.05561700  | -0.50368400 | -1.11965800 |
| C | 5.32926500  | -0.26016400 | -2.01370000 |
| H | 5.85775700  | -0.89168900 | -4.00669200 |
| C | 5.76500600  | 0.04674800  | -0.72157100 |
| H | 7.42310500  | 0.21219200  | 0.64659700  |
| O | 3.96077000  | -0.09864700 | -2.08407100 |
| O | 4.67951600  | 0.40949300  | 0.04984100  |
| B | 3.58296600  | 0.31355900  | -0.80705200 |
| O | 2.30468700  | 0.58753300  | -0.48814300 |
| H | 1.40508000  | 1.44412100  | 6.25973200  |
| C | 1.39628300  | 1.64015900  | 5.19142700  |
| C | 1.07549600  | 2.91919600  | 4.72801100  |
| C | 1.71200600  | 0.59943200  | 4.30242100  |
| C | 1.05646900  | 3.21477400  | 3.35495100  |
| H | 0.83851200  | 3.70344300  | 5.44115600  |
| C | 1.68829600  | 0.90119800  | 2.95145800  |
| H | 1.97123500  | -0.39393400 | 4.65315300  |
| C | 1.36784600  | 2.18157500  | 2.48737100  |
| H | 0.81803300  | 4.20701600  | 2.98664200  |
| O | 1.96826200  | 0.08337100  | 1.88230800  |
| O | 1.44189900  | 2.20434100  | 1.11500900  |
| B | 1.73726500  | 0.87626900  | 0.73802800  |
| H | 0.03998700  | 0.30186400  | 0.25369200  |

#### TSC1

|    | x           | y           | z           |
|----|-------------|-------------|-------------|
| Ni | -0.00000400 | -0.38367100 | 0.16923600  |
| P  | -2.21625900 | -0.10378100 | 0.10621600  |
| P  | 2.21625700  | -0.10378800 | 0.10622600  |
| C  | 0.00000600  | 1.43299200  | -0.39982000 |
| O  | -2.39268600 | 1.51488300  | -0.32049500 |
| C  | -3.17993900 | -0.90971000 | -1.32018000 |
| C  | -3.12077600 | -0.09875600 | 1.77502500  |
| O  | 2.39269900  | 1.51487100  | -0.32049700 |
| C  | 3.17995700  | -0.90969400 | -1.32017100 |
| C  | 3.12072400  | -0.09876200 | 1.77506200  |
| C  | -1.18599800 | 2.16211900  | -0.55069800 |
| C  | 1.18601400  | 2.16211400  | -0.55069500 |
| C  | -4.60104100 | -0.33465100 | -1.47543900 |
| C  | -3.23327900 | -2.44334600 | -1.17284700 |
| C  | -2.35972300 | -0.57374200 | -2.58945500 |
| C  | -3.28003500 | -1.53866200 | 2.30083800  |
| C  | -4.48695700 | 0.61372100  | 1.74328300  |
| C  | -2.18584500 | 0.68123500  | 2.72878800  |
| C  | 2.35956300  | -0.57400600 | -2.58940600 |
| C  | 4.60093500  | -0.33437600 | -1.47563000 |
| C  | 3.23360000  | -2.44330000 | -1.17266700 |
| C  | 2.18609200  | 0.68186200  | 2.72860000  |
| C  | 4.48722900  | 0.61308600  | 1.74322800  |
| C  | 3.27932100  | -1.53862300 | 2.30120600  |
| C  | -1.21578100 | 3.51309600  | -0.89919200 |

|   |             |             |             |
|---|-------------|-------------|-------------|
| C | 1.21580200  | 3.51309200  | -0.89918600 |
| H | -5.00254600 | -0.66171700 | -2.44325000 |
| H | -4.60962000 | 0.75930100  | -1.46266400 |
| H | -5.28335400 | -0.70181800 | -0.70375100 |
| H | -3.78276900 | -2.85112200 | -2.03179300 |
| H | -3.76339200 | -2.76524900 | -0.27108800 |
| H | -2.22573200 | -2.86839900 | -1.19060100 |
| H | -2.29761700 | 0.50467000  | -2.76551100 |
| H | -2.86298400 | -1.02642900 | -3.45361500 |
| H | -1.35160600 | -0.99129500 | -2.52824200 |
| H | -4.01650400 | -2.10959200 | 1.72762000  |
| H | -3.62978200 | -1.50368800 | 3.34067900  |
| H | -2.33171200 | -2.08768200 | 2.28819800  |
| H | -4.41671500 | 1.60508600  | 1.28649700  |
| H | -4.84214100 | 0.74244800  | 2.77414500  |
| H | -5.24513800 | 0.03782500  | 1.20814500  |
| H | -2.64520200 | 0.72070600  | 3.72496100  |
| H | -2.02596900 | 1.70993500  | 2.39054500  |
| H | -1.20902900 | 0.19640500  | 2.82256600  |
| H | 2.86285800  | -1.02664600 | -3.45357100 |
| H | 2.29721700  | 0.50438100  | -2.76554000 |
| H | 1.35154400  | -0.99177700 | -2.52807100 |
| H | 4.60929300  | 0.75957800  | -1.46295000 |
| H | 5.00239500  | -0.66144700 | -2.44345700 |
| H | 5.28340500  | -0.70133200 | -0.70398400 |
| H | 3.78305300  | -2.85108200 | -2.03163300 |
| H | 2.22613200  | -2.86854300 | -1.19024500 |
| H | 3.76388900  | -2.76499700 | -0.27093600 |
| H | 1.20899600  | 0.19758500  | 2.82232500  |
| H | 2.02683000  | 1.71059900  | 2.39018800  |
| H | 2.64534500  | 0.72121300  | 3.72482500  |
| H | 4.41751100  | 1.60431100  | 1.28605400  |
| H | 5.24521800  | 0.03662600  | 1.20842100  |
| H | 4.84233900  | 0.74205000  | 2.77408600  |
| H | 3.62911000  | -1.50357000 | 3.34103100  |
| H | 4.01551000  | -2.11003100 | 1.72810600  |
| H | 2.33074900  | -2.08721300 | 2.28870700  |
| H | -2.16603400 | 4.02475100  | -1.01325400 |
| C | 0.00001200  | 4.17688300  | -1.07944700 |
| H | 2.16605700  | 4.02474400  | -1.01324700 |
| H | 0.00001400  | 5.22883500  | -1.35151100 |
| H | -0.00001600 | -1.79339200 | 0.92893600  |
| H | -0.91002100 | -3.34371600 | 0.58531300  |
| C | 0.00004100  | -2.91658000 | 0.10999500  |
| H | 0.91006000  | -3.34368600 | 0.58541600  |
| O | 0.00010800  | -2.70178700 | -1.15153900 |

**TSC2-1**

|    | x           | y           | z           |
|----|-------------|-------------|-------------|
| Ni | 0.64159500  | 0.00003700  | 0.11936400  |
| P  | 0.93925800  | 2.24969500  | -0.02386000 |
| P  | 0.93977800  | -2.24954100 | -0.02387000 |
| O  | -1.22970900 | -0.00030300 | 1.23875000  |
| C  | 2.52759400  | 0.00025300  | -0.12729200 |
| O  | 2.60842300  | 2.39697700  | -0.13103300 |
| C  | 0.42813600  | 3.10845500  | -1.64387600 |
| C  | 0.62863500  | 3.27833300  | 1.53726500  |
| O  | 2.60896500  | -2.39645400 | -0.13111200 |

|   |             |             |             |
|---|-------------|-------------|-------------|
| C | 0.42877700  | -3.10847500 | -1.64383800 |
| C | 0.62943600  | -3.27819000 | 1.53729200  |
| C | 3.27532200  | 1.18493200  | -0.19400500 |
| C | 3.27559100  | -1.18425600 | -0.19404600 |
| C | 1.29985200  | 4.34523300  | -1.94467200 |
| C | -1.06206500 | 3.50114800  | -1.64154800 |
| C | 0.67299000  | 2.05818000  | -2.75219900 |
| C | -0.87966600 | 3.50702700  | 1.76334100  |
| C | 1.37145400  | 4.62901000  | 1.52277900  |
| C | 1.20115900  | 2.41442500  | 2.68616400  |
| C | 0.67329900  | -2.05816200 | -2.75219600 |
| C | 1.30081000  | -4.34502500 | -1.94464700 |
| C | -1.06132200 | -3.50155000 | -1.64141000 |
| C | 1.20203700  | -2.41424900 | 2.68613200  |
| C | 1.37231800  | -4.62883300 | 1.52274400  |
| C | -0.87882700 | -3.50695800 | 1.76352600  |
| C | 4.66495200  | 1.21338900  | -0.31847500 |
| C | 4.66522800  | -1.21239500 | -0.31851500 |
| H | 1.04820800  | 4.70739600  | -2.94979600 |
| H | 2.36686700  | 4.10872800  | -1.92564900 |
| H | 1.11530200  | 5.16668600  | -1.24820600 |
| H | -1.34865400 | 3.77568500  | -2.66516900 |
| H | -1.24918600 | 4.37513300  | -1.01042400 |
| H | -1.72228100 | 2.69311600  | -1.31331700 |
| H | 1.71353700  | 1.71721100  | -2.77565000 |
| H | 0.44758500  | 2.51392700  | -3.72486000 |
| H | 0.02508600  | 1.18610900  | -2.62950000 |
| H | -1.27020000 | 4.29705600  | 1.11676800  |
| H | -1.03744100 | 3.82708200  | 2.80142600  |
| H | -1.47542800 | 2.60896700  | 1.58739700  |
| H | 2.43202900  | 4.51112400  | 1.28357700  |
| H | 1.29674600  | 5.08045800  | 2.52071500  |
| H | 0.92912600  | 5.33573100  | 0.81551500  |
| H | 1.07507500  | 2.95454700  | 3.63317600  |
| H | 2.26955400  | 2.21573000  | 2.55252700  |
| H | 0.68130000  | 1.45608000  | 2.76976500  |
| H | 0.44792200  | -2.51397100 | -3.72483300 |
| H | 1.71376600  | -1.71695600 | -2.77573300 |
| H | 0.02520500  | -1.18624100 | -2.62945000 |
| H | 2.36776100  | -4.10822700 | -1.92567900 |
| H | 1.04921500  | -4.70727900 | -2.94975000 |
| H | 1.11652500  | -5.16651100 | -1.24815000 |
| H | -1.34790900 | -3.77617000 | -2.66500900 |
| H | -1.72173100 | -2.69368800 | -1.31314500 |
| H | -1.24817300 | -4.37558200 | -1.01026800 |
| H | 0.68212300  | -1.45594000 | 2.76982900  |
| H | 2.27039900  | -2.21547500 | 2.55236400  |
| H | 1.07611300  | -2.95439800 | 3.63315000  |
| H | 2.43286400  | -4.51091500 | 1.28342200  |
| H | 0.92993800  | -5.33559400 | 0.81555200  |
| H | 1.29774700  | -5.08026000 | 2.52069900  |
| H | -1.03647100 | -3.82713400 | 2.80159400  |
| H | -1.26942300 | -4.29691500 | 1.11690500  |
| H | -1.47460900 | -2.60888200 | 1.58775400  |
| H | 5.18278400  | 2.16593500  | -0.36408300 |
| C | 5.35261400  | 0.00057600  | -0.37948900 |
| H | 5.18327400  | -2.16482400 | -0.36415000 |
| H | 6.43467400  | 0.00070100  | -0.47623800 |

|   |             |             |             |
|---|-------------|-------------|-------------|
| H | -7.52973900 | 1.23609200  | -0.54422500 |
| C | -6.59097000 | 0.69696700  | -0.44844000 |
| C | -6.59090300 | -0.69787900 | -0.44852200 |
| C | -5.39097800 | 1.42247600  | -0.32737000 |
| C | -5.39084100 | -1.42328600 | -0.32753700 |
| H | -7.52962100 | -1.23708300 | -0.54437000 |
| C | -4.21313500 | 0.70252400  | -0.20981500 |
| H | -5.38044800 | 2.50851500  | -0.32520700 |
| C | -4.21306700 | -0.70323400 | -0.20989600 |
| H | -5.38020400 | -2.50932500 | -0.32550000 |
| O | -2.94281100 | 1.17687500  | -0.07888900 |
| O | -2.94270300 | -1.17747900 | -0.07901700 |
| B | -2.04736200 | -0.00026900 | 0.01562000  |
| H | -1.16693000 | -0.00018200 | -0.88061500 |
| C | -1.87205500 | -0.00022500 | 2.50682000  |
| H | -2.50197800 | -0.88950100 | 2.62659200  |
| H | -1.10771500 | -0.00048300 | 3.28994500  |
| H | -2.50153200 | 0.88934600  | 2.62673500  |

**TSC3-1**

|    | x           | y           | z           |
|----|-------------|-------------|-------------|
| Ni | -0.49390100 | 0.30331700  | 0.13132100  |
| P  | -2.10086400 | -1.26321200 | -0.05623800 |
| P  | 0.66789800  | 2.19950100  | 0.04927200  |
| C  | -1.85488000 | 1.41676000  | -0.64777500 |
| O  | -3.37741600 | -0.41841600 | -0.76733700 |
| C  | -1.89422300 | -2.64650700 | -1.35279100 |
| C  | -2.98652200 | -1.83266700 | 1.52501900  |
| O  | -0.41898900 | 3.32377000  | -0.57732100 |
| C  | 2.05934100  | 2.32820700  | -1.24410200 |
| C  | 1.07893600  | 3.07931100  | 1.67970700  |
| C  | -3.11613000 | 0.92079700  | -0.99436500 |
| C  | -1.65216800 | 2.77823300  | -0.89979800 |
| C  | -3.21969900 | -2.95374800 | -2.08033100 |
| C  | -1.32964100 | -3.94151000 | -0.73907500 |
| C  | -0.88327300 | -2.08841700 | -2.38099700 |
| C  | -2.11321800 | -2.78612300 | 2.36226700  |
| C  | -4.34806700 | -2.48911200 | 1.22500600  |
| C  | -3.22161300 | -0.53447300 | 2.33252900  |
| C  | 1.74399900  | 1.25201700  | -2.30835500 |
| C  | 2.08198300  | 3.70920000  | -1.93087700 |
| C  | 3.43553400  | 2.03455700  | -0.61972100 |
| C  | -0.24307500 | 3.05838500  | 2.48289900  |
| C  | 1.51109300  | 4.54213500  | 1.46168500  |
| C  | 2.15710700  | 2.32137200  | 2.47767200  |
| C  | -4.12539400 | 1.70608700  | -1.55533600 |
| C  | -2.62094800 | 3.61384100  | -1.45736900 |
| H  | -3.01936200 | -3.70591400 | -2.85462100 |
| H  | -3.63539700 | -2.06693500 | -2.56358300 |
| H  | -3.98038200 | -3.36372800 | -1.41099300 |
| H  | -1.07299000 | -4.62774800 | -1.55726700 |
| H  | -2.06825200 | -4.45096500 | -0.11293700 |
| H  | -0.42002900 | -3.77001000 | -0.15887200 |
| H  | -1.23050100 | -1.14921600 | -2.82633000 |
| H  | -0.76037900 | -2.81663000 | -3.19362900 |
| H  | 0.09702000  | -1.91725900 | -1.92768400 |
| H  | -2.04001300 | -3.78017400 | 1.91432900  |
| H  | -2.57904700 | -2.90791100 | 3.34935500  |

|   |             |             |             |
|---|-------------|-------------|-------------|
| H | -1.09709000 | -2.41131000 | 2.50688800  |
| H | -4.97184400 | -1.86240500 | 0.58157100  |
| H | -4.88253900 | -2.64330200 | 2.17173200  |
| H | -4.23397900 | -3.47058600 | 0.75493400  |
| H | -3.74146800 | -0.78722900 | 3.26575800  |
| H | -3.83913400 | 0.18558900  | 1.78699700  |
| H | -2.27644800 | -0.04705100 | 2.59515800  |
| H | 2.49050700  | 1.31346400  | -3.11075400 |
| H | 0.75587900  | 1.39996700  | -2.75757900 |
| H | 1.78407400  | 0.24254000  | -1.88814000 |
| H | 1.13959300  | 3.92562500  | -2.43910300 |
| H | 2.88406600  | 3.70809800  | -2.68053000 |
| H | 2.28337900  | 4.52463300  | -1.23127000 |
| H | 4.16741100  | 1.89609600  | -1.42525800 |
| H | 3.43295400  | 1.12414600  | -0.01638000 |
| H | 3.78444200  | 2.86598000  | 0.00080600  |
| H | -0.57149000 | 2.03479100  | 2.69413100  |
| H | -1.05110200 | 3.57421600  | 1.95577100  |
| H | -0.08441400 | 3.56697700  | 3.44234700  |
| H | 0.78240300  | 5.09641100  | 0.86332900  |
| H | 2.48898600  | 4.61269400  | 0.97552600  |
| H | 1.59589200  | 5.03797500  | 2.43761200  |
| H | 2.19272100  | 2.72843500  | 3.49667900  |
| H | 3.15320800  | 2.43408100  | 2.04471000  |
| H | 1.94375500  | 1.25296200  | 2.54895000  |
| H | -5.08567000 | 1.26481000  | -1.80229200 |
| C | -3.86093900 | 3.05851100  | -1.78226100 |
| H | -2.40410800 | 4.66316100  | -1.62967300 |
| H | -4.63147700 | 3.68844700  | -2.21849200 |
| O | 1.11200600  | -2.05756600 | 2.50762800  |
| C | 1.33068500  | -1.26447600 | 3.65576100  |
| H | 2.38198800  | -0.96541000 | 3.74576200  |
| H | 0.70473600  | -0.36071600 | 3.63747200  |
| H | 1.05331600  | -1.85897800 | 4.53183200  |
| H | 6.28267600  | -1.87588100 | -1.86227700 |
| C | 5.29384000  | -2.06880300 | -1.45570100 |
| C | 4.86008200  | -1.34071700 | -0.33369500 |
| C | 4.47805200  | -3.03311700 | -2.05086900 |
| C | 3.59415400  | -1.61990600 | 0.15442500  |
| H | 5.49133100  | -0.59590200 | 0.14065600  |
| C | 3.19729800  | -3.31562200 | -1.54468100 |
| H | 4.83823600  | -3.58133000 | -2.91687700 |
| C | 2.78028000  | -2.59715300 | -0.43612100 |
| O | 2.94753200  | -1.05521100 | 1.22316600  |
| H | 2.56088200  | -4.07340100 | -1.99070200 |
| O | 1.60344700  | -2.70200900 | 0.25012000  |
| B | 1.66682400  | -1.71409900 | 1.28890000  |
| H | 0.64905000  | -0.58472500 | 0.76938100  |

**TSD1-1**

|   | x           | y           | z           |
|---|-------------|-------------|-------------|
| C | -5.78891100 | -0.40044700 | -0.86218400 |
| C | -4.48318600 | 0.04113800  | -0.64460100 |
| C | -3.42553500 | -0.80887600 | -0.29091800 |
| C | -3.76655200 | -2.16326200 | -0.15786000 |
| C | -5.05613700 | -2.65678800 | -0.36079200 |
| C | -6.06436600 | -1.76050800 | -0.71674500 |
| H | -6.55965400 | 0.31238600  | -1.13663500 |

|    |             |             |             |
|----|-------------|-------------|-------------|
| H  | -5.25091600 | -3.71755900 | -0.24135100 |
| H  | -7.07454200 | -2.12501700 | -0.88063600 |
| O  | -2.77981700 | -3.06741200 | 0.18813800  |
| O  | -4.23149900 | 1.39410000  | -0.78909100 |
| P  | -1.27957500 | -2.36725200 | 0.46929600  |
| P  | -2.65306100 | 1.84086600  | -0.43745300 |
| C  | -1.08268200 | -2.75630000 | 2.32322200  |
| C  | -0.21273600 | -3.45883700 | -0.65722600 |
| C  | -2.94818800 | 2.95913500  | 1.07772300  |
| C  | -2.25964700 | 2.79855400  | -2.02678900 |
| H  | 1.87812500  | 1.46251300  | -1.55506800 |
| C  | 1.27926500  | 0.56139700  | -1.71700800 |
| O  | 0.41049900  | 0.35585600  | -0.64470500 |
| O  | 2.13397500  | -0.56325200 | -1.91196900 |
| C  | 6.59798400  | 0.90510800  | -0.76659000 |
| C  | 5.47444500  | 0.18062200  | -1.11916800 |
| C  | 5.51980100  | -1.19847300 | -1.34102200 |
| C  | 6.69596600  | -1.91819000 | -1.22991600 |
| C  | 7.84667000  | -1.19367800 | -0.87885900 |
| C  | 7.79824100  | 0.18541200  | -0.65081000 |
| H  | 6.54229900  | 1.97171700  | -0.57870700 |
| H  | 6.72030200  | -2.98871300 | -1.40474400 |
| H  | 8.79209000  | -1.71922600 | -0.77981400 |
| H  | 8.70632200  | 0.71358000  | -0.37489300 |
| O  | 4.25641400  | -1.65356300 | -1.66273300 |
| O  | 4.18224700  | 0.62893300  | -1.30916300 |
| B  | 3.45321500  | -0.51520500 | -1.62557800 |
| H  | 0.68785200  | 0.65477900  | -2.63085100 |
| Ni | -1.64205300 | -0.18193700 | -0.08243500 |
| C  | -0.41118900 | -2.88449100 | -2.07897200 |
| H  | -0.01697800 | -1.87149200 | -2.16284000 |
| H  | 0.13386300  | -3.51421600 | -2.79342800 |
| H  | -1.46746200 | -2.88442300 | -2.37116700 |
| C  | 1.27229800  | -3.37607700 | -0.25257900 |
| H  | 1.47475500  | -3.96442100 | 0.64826200  |
| H  | 1.88702800  | -3.78954400 | -1.06107200 |
| H  | 1.60922600  | -2.35102600 | -0.08435400 |
| C  | -0.67916800 | -4.92979000 | -0.66972300 |
| H  | -0.08248400 | -5.46859600 | -1.41696400 |
| H  | -0.53154900 | -5.43100000 | 0.28873600  |
| H  | -1.73247300 | -5.02033100 | -0.94702300 |
| C  | -1.24503800 | -4.26049700 | 2.61851800  |
| H  | -0.37819700 | -4.83843700 | 2.28620100  |
| H  | -1.32730100 | -4.39613400 | 3.70471300  |
| H  | -2.14584500 | -4.67712500 | 2.15853400  |
| C  | 0.26803700  | -2.25834400 | 2.87158900  |
| H  | 0.27206600  | -2.40190800 | 3.96012400  |
| H  | 1.11469600  | -2.81594900 | 2.46439700  |
| H  | 0.44249900  | -1.20021900 | 2.66996300  |
| C  | -2.22429200 | -1.98755600 | 3.02759300  |
| H  | -2.14679900 | -0.90804200 | 2.87015100  |
| H  | -3.21207100 | -2.31685400 | 2.69095400  |
| H  | -2.15667900 | -2.17479900 | 4.10673200  |
| C  | -3.00889900 | 2.00820300  | 2.29497200  |
| H  | -3.78564500 | 1.24376700  | 2.18316100  |
| H  | -2.05069100 | 1.50822500  | 2.46084300  |
| H  | -3.24514600 | 2.59674000  | 3.19079500  |
| C  | -1.79827700 | 3.96513600  | 1.28014100  |



|   |             |            |             |
|---|-------------|------------|-------------|
| H | -1.91015900 | 4.42420100 | 2.27092300  |
| H | -0.80990100 | 3.49804800 | 1.23615300  |
| H | -1.83697500 | 4.77477600 | 0.54461400  |
| C | -4.29349400 | 3.70891400 | 0.97946800  |
| H | -4.44717200 | 4.26037800 | 1.91596800  |
| H | -4.31149900 | 4.43679200 | 0.16477800  |
| H | -5.13445900 | 3.02437400 | 0.84466700  |
| C | -0.87297500 | 3.46946700 | -1.95273400 |
| H | -0.55923900 | 3.74777000 | -2.96699700 |
| H | -0.89475500 | 4.38396800 | -1.35558900 |
| H | -0.10938400 | 2.81986700 | -1.52232000 |
| C | -3.33339400 | 3.85103700 | -2.36456600 |
| H | -3.30210900 | 4.70295500 | -1.67927400 |
| H | -3.14145900 | 4.23923600 | -3.37347800 |
| H | -4.34102500 | 3.42621600 | -2.35261800 |
| C | -2.25803800 | 1.72053000 | -3.13686900 |
| H | -1.51376200 | 0.93969000 | -2.95120600 |
| H | -3.23565000 | 1.23891200 | -3.23668800 |
| H | -2.01706000 | 2.19762800 | -4.09521200 |
| C | 2.95519400  | 3.55473700 | 1.72804100  |
| C | 2.27824400  | 2.39188700 | 1.40216900  |
| C | 2.80666400  | 1.12618500 | 1.70399400  |
| C | 4.02741400  | 0.99052900 | 2.34383200  |
| C | 4.72102000  | 2.16800800 | 2.68151600  |
| C | 4.19667300  | 3.42477500 | 2.37895800  |
| H | 2.53768800  | 4.52811700 | 1.48756300  |
| H | 4.43014300  | 0.00816600 | 2.57124700  |
| H | 5.67939100  | 2.09124400 | 3.18806000  |
| H | 4.74885000  | 4.32000400 | 2.65245400  |
| O | 1.96315900  | 0.14420600 | 1.27353200  |
| O | 1.07242600  | 2.26246600 | 0.77495200  |
| B | 0.76785500  | 0.81617800 | 0.72612600  |
| H | -0.27700800 | 0.53149700 | 1.35421600  |

**TSD2-1**

|   | x           | y           | z           |
|---|-------------|-------------|-------------|
| C | 5.77163800  | 1.33403600  | -0.76731800 |
| C | 4.57374400  | 0.64063000  | -0.58611000 |
| C | 3.37335700  | 1.26258800  | -0.22779600 |
| C | 3.42936200  | 2.64892600  | -0.04902700 |
| C | 4.59676900  | 3.39605100  | -0.21538300 |
| C | 5.76479500  | 2.71909800  | -0.57819800 |
| H | 6.67688400  | 0.80390700  | -1.04596700 |
| H | 4.58717600  | 4.47096800  | -0.06512800 |
| H | 6.68551100  | 3.28024100  | -0.71457400 |
| O | 2.26028600  | 3.30646600  | 0.31307500  |
| O | 4.56497500  | -0.73732800 | -0.76582100 |
| P | 0.94711100  | 2.26045100  | 0.50991500  |
| P | 3.05760300  | -1.43698500 | -0.45667300 |
| C | 0.55187900  | 2.56251300  | 2.34002400  |
| C | -0.29355200 | 3.07749700  | -0.67259800 |
| C | 3.50317600  | -2.56069600 | 1.00606900  |
| C | 2.82557400  | -2.38325200 | -2.08901300 |
| H | -2.77894100 | -2.08203400 | -2.42644200 |
| C | -2.10153700 | -1.24081900 | -2.61218800 |
| O | -1.01073200 | -1.26773800 | -1.73141100 |
| O | -2.81251900 | -0.01596600 | -2.52651400 |
| C | -7.04732600 | -1.10942600 | -0.45685100 |

|    |             |             |             |
|----|-------------|-------------|-------------|
| C  | -5.94994200 | -0.47649800 | -1.01127900 |
| C  | -5.88014100 | 0.91388100  | -1.13586700 |
| C  | -6.90749000 | 1.73781100  | -0.71268300 |
| C  | -8.02844600 | 1.10778500  | -0.14800400 |
| C  | -8.09683800 | -0.28335500 | -0.02257500 |
| H  | -7.08826000 | -2.18953000 | -0.36423200 |
| H  | -6.84358300 | 2.81594600  | -0.81532600 |
| H  | -8.85842900 | 1.71701600  | 0.19774900  |
| H  | -8.97865300 | -0.73779700 | 0.41942800  |
| O  | -4.67868600 | 1.26267900  | -1.71911300 |
| O  | -4.79327300 | -1.03682700 | -1.51782000 |
| B  | -4.02617900 | 0.05188700  | -1.93490500 |
| H  | -1.68933200 | -1.29986600 | -3.62078200 |
| Ni | 1.74216800  | 0.27290500  | 0.00568400  |
| C  | 0.02237700  | 2.47315200  | -2.06049600 |
| H  | -0.16400100 | 1.39592500  | -2.08137200 |
| H  | -0.62640800 | 2.94379400  | -2.81051000 |
| H  | 1.06275600  | 2.65365500  | -2.35337200 |
| C  | -1.74353700 | 2.73237600  | -0.28620500 |
| H  | -2.06049600 | 3.26234200  | 0.61825800  |
| H  | -2.41443500 | 3.03960000  | -1.09735800 |
| H  | -1.89311200 | 1.66085300  | -0.13248400 |
| C  | -0.11665800 | 4.60761000  | -0.74925800 |
| H  | -0.81044600 | 4.99830600  | -1.50520100 |
| H  | -0.34530100 | 5.10573600  | 0.19609400  |
| H  | 0.89919000  | 4.88275800  | -1.04255100 |
| C  | 0.20233200  | 4.02969400  | 2.65128700  |
| H  | -0.75842400 | 4.32669700  | 2.22066200  |
| H  | 0.12524900  | 4.15590000  | 3.73942900  |
| H  | 0.97491300  | 4.71496100  | 2.28884500  |
| C  | -0.58528100 | 1.62674200  | 2.79444200  |
| H  | -0.72655400 | 1.73793800  | 3.87758700  |
| H  | -1.53831500 | 1.85608700  | 2.31136100  |
| H  | -0.34908400 | 0.57858900  | 2.59014300  |
| C  | 1.83658100  | 2.18421800  | 3.11201600  |
| H  | 2.11973600  | 1.14113100  | 2.93727200  |
| H  | 2.68221400  | 2.81987700  | 2.83470100  |
| H  | 1.65359500  | 2.30857800  | 4.18718400  |
| C  | 4.07860100  | -1.62527700 | 2.09346700  |
| H  | 5.00509900  | -1.14342000 | 1.76866500  |
| H  | 3.36624400  | -0.84190500 | 2.37207400  |
| H  | 4.29745800  | -2.21828900 | 2.99084600  |
| C  | 2.22763100  | -3.22874800 | 1.55480600  |
| H  | 2.48966100  | -3.81446100 | 2.44601400  |
| H  | 1.47810800  | -2.48639900 | 1.84228500  |
| H  | 1.76319800  | -3.90633800 | 0.83406600  |
| C  | 4.56114000  | -3.62419000 | 0.65896900  |
| H  | 4.87149100  | -4.13431500 | 1.58069400  |
| H  | 4.17157400  | -4.38886700 | -0.01977300 |
| H  | 5.45256600  | -3.17670800 | 0.20846400  |
| C  | 1.81764600  | -3.53752800 | -1.93350400 |
| H  | 1.58457900  | -3.93598500 | -2.92984900 |
| H  | 2.22841100  | -4.36369300 | -1.34394900 |
| H  | 0.87806000  | -3.21823500 | -1.47692600 |
| C  | 4.15316600  | -2.91905400 | -2.66318700 |
| H  | 4.59078200  | -3.70808900 | -2.04729100 |
| H  | 3.95381000  | -3.34740000 | -3.65443000 |
| H  | 4.89331500  | -2.12378600 | -2.77798200 |

|   |             |             |             |
|---|-------------|-------------|-------------|
| C | 2.25386600  | -1.33379000 | -3.07150200 |
| H | 1.28117500  | -0.96158600 | -2.73836600 |
| H | 2.93257300  | -0.48223700 | -3.19275300 |
| H | 2.12609100  | -1.80102000 | -4.05737100 |
| C | -1.57144000 | -3.55319400 | 2.48940900  |
| C | -1.57535500 | -2.62696400 | 1.46002400  |
| C | -2.35788800 | -1.46900200 | 1.51653500  |
| C | -3.17500000 | -1.18893100 | 2.59761600  |
| C | -3.17907100 | -2.12248700 | 3.64692400  |
| C | -2.39374800 | -3.27807200 | 3.59413600  |
| H | -0.96517800 | -4.45143000 | 2.43513600  |
| H | -3.78557800 | -0.29237800 | 2.62472700  |
| H | -3.80674200 | -1.94058500 | 4.51445900  |
| H | -2.41976400 | -3.98100400 | 4.42182800  |
| O | -2.17409400 | -0.73873800 | 0.36410000  |
| O | -0.89308100 | -2.66259100 | 0.26819200  |
| B | -1.20128900 | -1.44596700 | -0.37526500 |
| H | 0.41024500  | -0.50595500 | 0.17150100  |

**TSE1-1**

|    | x           | y           | z           |
|----|-------------|-------------|-------------|
| C  | -5.91449400 | -1.64962500 | -0.06048100 |
| C  | -4.54374900 | -1.42555800 | -0.18926500 |
| C  | -3.94089800 | -0.19230800 | 0.08247100  |
| C  | -4.79313400 | 0.83091100  | 0.51126400  |
| C  | -6.17042500 | 0.66378400  | 0.65938500  |
| C  | -6.71780100 | -0.58813200 | 0.36577900  |
| H  | -6.33383600 | -2.62550300 | -0.28280000 |
| H  | -6.78975100 | 1.49062600  | 0.99160700  |
| H  | -7.78822700 | -0.73995900 | 0.47326400  |
| O  | -4.23536500 | 2.07009300  | 0.79831100  |
| O  | -3.72768400 | -2.47463500 | -0.59630500 |
| P  | -2.59707700 | 2.16496300  | 0.41544500  |
| P  | -2.08943300 | -2.09164100 | -0.51983800 |
| C  | -2.64636100 | 3.43654800  | -0.99307800 |
| C  | -1.91655500 | 2.83482600  | 2.05490800  |
| C  | -1.53560700 | -2.68777500 | -2.23137600 |
| C  | -1.51823100 | -3.19915600 | 0.90825000  |
| H  | 1.02837700  | 0.21097800  | -1.48560900 |
| C  | 0.92254000  | 0.84819100  | -0.62261300 |
| O  | 2.38904400  | 1.91533800  | -1.70554300 |
| O  | 1.57467000  | 0.56256400  | 0.52103200  |
| C  | 4.70123000  | -2.62527200 | 2.31230700  |
| C  | 3.85385000  | -1.90466000 | 1.48954500  |
| C  | 3.60282800  | -2.29025900 | 0.16893200  |
| C  | 4.18718700  | -3.41119400 | -0.39151300 |
| C  | 5.05021600  | -4.15042600 | 0.43388900  |
| C  | 5.30088700  | -3.76651600 | 1.75493700  |
| H  | 4.88902400  | -2.31704600 | 3.33543800  |
| H  | 3.99255800  | -3.69425900 | -1.42065000 |
| H  | 5.53577600  | -5.03523700 | 0.03294100  |
| H  | 5.97627200  | -4.35936500 | 2.36473500  |
| O  | 2.71438400  | -1.39987600 | -0.40350100 |
| O  | 3.13867300  | -0.76126600 | 1.77952100  |
| B  | 2.50693800  | -0.44368200 | 0.58724700  |
| H  | 0.52265100  | 1.83701100  | -0.69899500 |
| Ni | -2.05776300 | 0.07552000  | -0.11004300 |
| C  | -1.83045400 | 1.59991400  | 2.98262800  |

|   |             |             |             |
|---|-------------|-------------|-------------|
| H | -1.14000800 | 0.84630600  | 2.58944900  |
| H | -1.45937900 | 1.91623600  | 3.96575100  |
| H | -2.81033300 | 1.13270800  | 3.12920300  |
| C | -0.50439700 | 3.42356200  | 1.87117400  |
| H | -0.50388400 | 4.32335100  | 1.24825700  |
| H | -0.11305200 | 3.71075500  | 2.85516300  |
| H | 0.20002800  | 2.70081100  | 1.44802800  |
| C | -2.84934700 | 3.87485300  | 2.70770800  |
| H | -2.47051700 | 4.09809500  | 3.71333900  |
| H | -2.88233000 | 4.81599400  | 2.15498200  |
| H | -3.86994600 | 3.49624200  | 2.80555500  |
| C | -3.16936800 | 4.81375900  | -0.54446500 |
| H | -2.45551500 | 5.33735500  | 0.09852800  |
| H | -3.32500200 | 5.43899300  | -1.43303500 |
| H | -4.12589200 | 4.73529500  | -0.01882800 |
| C | -1.25501500 | 3.58119000  | -1.64122800 |
| H | -1.31887400 | 4.31199400  | -2.45693900 |
| H | -0.48775800 | 3.94094800  | -0.94960800 |
| H | -0.90963200 | 2.64045900  | -2.08063500 |
| C | -3.61755300 | 2.85047100  | -2.04459900 |
| H | -3.30542300 | 1.85550900  | -2.37993900 |
| H | -4.63908800 | 2.77748100  | -1.66153200 |
| H | -3.62784900 | 3.51270500  | -2.91935000 |
| C | -1.89176600 | -1.52839200 | -3.19131000 |
| H | -2.96043600 | -1.28950100 | -3.15885600 |
| H | -1.32945200 | -0.61824600 | -2.95733300 |
| H | -1.64449300 | -1.82283900 | -4.21901300 |
| C | -0.01526200 | -2.93372900 | -2.26796400 |
| H | 0.29271000  | -3.09339600 | -3.30892200 |
| H | 0.56600600  | -2.09132100 | -1.88087100 |
| H | 0.26947800  | -3.82749400 | -1.70379900 |
| C | -2.29017800 | -3.95321500 | -2.68791500 |
| H | -1.99894000 | -4.17812600 | -3.72200400 |
| H | -2.04814700 | -4.82821500 | -2.08037800 |
| H | -3.37284600 | -3.80750900 | -2.66262100 |
| C | -0.05069900 | -2.88134200 | 1.25574600  |
| H | 0.24286200  | -3.47174100 | 2.13279900  |
| H | 0.64084400  | -3.12940300 | 0.44719700  |
| H | 0.08169600  | -1.82416400 | 1.50813300  |
| C | -1.68977900 | -4.70154200 | 0.61857300  |
| H | -0.99801700 | -5.05749400 | -0.15066000 |
| H | -1.47534100 | -5.26694000 | 1.53462200  |
| H | -2.71235400 | -4.94162800 | 0.31094600  |
| C | -2.40355400 | -2.81962200 | 2.11815600  |
| H | -2.32764100 | -1.75496200 | 2.36211500  |
| H | -3.45713000 | -3.05655900 | 1.94596600  |
| H | -2.06486900 | -3.39078800 | 2.99163200  |
| C | 7.07103600  | 3.00238400  | -1.22435000 |
| C | 5.80275700  | 2.45536300  | -1.11313100 |
| C | 5.53683400  | 1.41241800  | -0.21366300 |
| C | 6.52065400  | 0.88178000  | 0.60210600  |
| C | 7.80983800  | 1.43346400  | 0.49440700  |
| C | 8.07836500  | 2.47203300  | -0.39971800 |
| H | 7.26892900  | 3.80873400  | -1.92365300 |
| H | 6.30287100  | 0.07127300  | 1.29057000  |
| H | 8.60805100  | 1.04131200  | 1.11889700  |
| H | 9.08385300  | 2.87971700  | -0.46245800 |
| O | 4.21549800  | 1.06289700  | -0.31204600 |

|   |             |            |             |
|---|-------------|------------|-------------|
| O | 4.67094900  | 2.79203300 | -1.79323700 |
| B | 3.62786100  | 1.93150300 | -1.32093600 |
| H | -0.47790000 | 0.25975900 | -0.27388700 |

**TSF1-1**

|   | x           | y           | z           |
|---|-------------|-------------|-------------|
| H | 0.06184600  | 3.20186900  | 1.32806700  |
| C | 0.53243000  | 3.30299500  | 0.34312100  |
| O | 1.71657100  | 2.87128300  | 0.12672600  |
| H | 0.09978200  | 4.05559500  | -0.32649100 |
| C | 3.20441800  | -1.36811000 | 1.46946300  |
| C | 2.57887800  | -0.40023700 | 0.70423000  |
| C | 2.85608900  | -0.24764100 | -0.66050800 |
| C | 3.76948300  | -1.05547000 | -1.31323500 |
| C | 4.41056900  | -2.04188400 | -0.54492700 |
| C | 4.13406000  | -2.19463300 | 0.81587900  |
| H | 2.98242700  | -1.47801400 | 2.52603200  |
| H | 3.97570100  | -0.92683700 | -2.37081500 |
| H | 5.13517500  | -2.69599600 | -1.02156000 |
| H | 4.64683500  | -2.96585700 | 1.38374500  |
| O | 2.09517000  | 0.77359800  | -1.17650000 |
| O | 1.63811300  | 0.52303000  | 1.08980600  |
| B | 1.39190600  | 1.31037900  | -0.07291600 |
| C | -4.67775000 | 0.27069200  | 0.19279400  |
| C | -3.30679700 | 0.30077400  | 0.01733700  |
| C | -2.55923700 | -0.86082800 | -0.18617700 |
| C | -3.14481000 | -2.11267600 | -0.22435800 |
| C | -4.53631400 | -2.15783900 | -0.04713800 |
| C | -5.28516500 | -0.99418300 | 0.15649700  |
| H | -5.24824600 | 1.17998500  | 0.34937600  |
| H | -2.55284800 | -3.00762400 | -0.38268000 |
| H | -5.03999400 | -3.11963200 | -0.06913800 |
| H | -6.36041900 | -1.06739500 | 0.28955200  |
| O | -1.22377500 | -0.52631600 | -0.32856900 |
| O | -2.45774900 | 1.39596100  | 0.00728800  |
| B | -1.19813200 | 0.85204300  | -0.20688000 |
| O | -0.08386100 | 1.63319900  | -0.29937100 |

**[NijH**

|   | x           | y           | z           |
|---|-------------|-------------|-------------|
| C | -1.22109900 | -3.51585100 | -0.02484800 |
| C | -1.18958100 | -2.12031600 | -0.02485300 |
| C | 0.00001400  | -1.38688200 | -0.00026100 |
| C | 1.18962800  | -2.12029200 | 0.02405600  |
| C | 1.22118100  | -3.51582700 | 0.02362700  |
| C | 0.00004900  | -4.19874400 | -0.00070700 |
| H | -2.16647300 | -4.04903800 | -0.04347300 |
| H | 2.16656800  | -4.04899700 | 0.04206800  |
| H | 0.00006400  | -5.28567900 | -0.00086900 |
| O | 2.38977400  | -1.40944800 | 0.04956600  |
| O | -2.38974800 | -1.40949600 | -0.05023700 |
| P | 2.14878700  | 0.26828800  | 0.00472700  |
| P | -2.14879100 | 0.26822500  | -0.00470000 |
| C | 3.07979000  | 0.77612300  | 1.57732700  |
| C | 3.06319000  | 0.70826100  | -1.59668700 |
| C | -3.06308500 | 0.70756500  | 1.59696000  |
| C | -3.07990900 | 0.77674200  | -1.57697900 |
| H | -0.00008900 | 2.05121300  | 0.00015000  |

|    |             |             |             |
|----|-------------|-------------|-------------|
| Ni | -0.00001300 | 0.53006900  | 0.00003100  |
| C  | 2.36253200  | -0.11551200 | -2.70223700 |
| H  | 1.29012200  | 0.10054400  | -2.74975900 |
| H  | 2.80468300  | 0.14413400  | -3.67280300 |
| H  | 2.48679000  | -1.19097400 | -2.54733300 |
| C  | 4.55966300  | 0.34815500  | -1.58184600 |
| H  | 4.96886900  | 0.47147300  | -2.59335200 |
| H  | 5.13560100  | 1.00120600  | -0.91878000 |
| H  | 4.72390600  | -0.69076700 | -1.27934400 |
| C  | 2.87444900  | 2.20789500  | -1.90690800 |
| H  | 3.29480800  | 2.42176300  | -2.89842700 |
| H  | 1.81626000  | 2.48674200  | -1.91392600 |
| H  | 3.38721200  | 2.85231800  | -1.18715500 |
| C  | 4.38152900  | -0.01748500 | 1.80429700  |
| H  | 5.15145600  | 0.21785800  | 1.06584200  |
| H  | 4.78396400  | 0.23909800  | 2.79320700  |
| H  | 4.20086500  | -1.09540700 | 1.77997500  |
| C  | 3.36432400  | 2.29014800  | 1.56801700  |
| H  | 3.71769300  | 2.59474700  | 2.56175800  |
| H  | 4.14559800  | 2.55840800  | 0.84967300  |
| H  | 2.46553900  | 2.87299600  | 1.33870500  |
| C  | 2.10342200  | 0.45863000  | 2.73414400  |
| H  | 1.17625000  | 1.03427500  | 2.64413100  |
| H  | 1.84536800  | -0.60502800 | 2.76749700  |
| H  | 2.57940500  | 0.72068000  | 3.68837300  |
| C  | -2.36219500 | -0.11641500 | 2.70220900  |
| H  | -2.48625000 | -1.19185500 | 2.54698800  |
| H  | -1.28982600 | 0.09983400  | 2.74972700  |
| H  | -2.80433400 | 0.14284100  | 3.67288500  |
| C  | -2.87456600 | 2.20714600  | 1.90755400  |
| H  | -3.29492600 | 2.42070200  | 2.89914000  |
| H  | -1.81641900 | 2.48614700  | 1.91460600  |
| H  | -3.38744600 | 2.85166900  | 1.18797000  |
| C  | -4.55950000 | 0.34724200  | 1.58215700  |
| H  | -4.96860200 | 0.47009100  | 2.59376300  |
| H  | -5.13562700 | 1.00046500  | 0.91942400  |
| H  | -4.72360900 | -0.69158600 | 1.27926000  |
| C  | -4.38151600 | -0.01697500 | -1.80435800 |
| H  | -5.15142900 | 0.21771800  | -1.06568400 |
| H  | -4.78407800 | 0.24018600  | -2.79306700 |
| H  | -4.20062900 | -1.09487500 | -1.78076400 |
| C  | -3.36472400 | 2.29071100  | -1.56679400 |
| H  | -3.71845600 | 2.59576300  | -2.56026600 |
| H  | -4.14582600 | 2.55844200  | -0.84806000 |
| H  | -2.46598300 | 2.87361900  | -1.33746400 |
| C  | -2.10351400 | 0.46006800  | -2.73400400 |
| H  | -1.17651500 | 1.03596200  | -2.64379600 |
| H  | -1.84513300 | -0.60349500 | -2.76784300 |
| H  | -2.57964400 | 0.72239100  | -3.68808500 |

**[Ni]OBcat**

|    | x           | y           | z           |
|----|-------------|-------------|-------------|
| Ni | -0.64724800 | 0.00010600  | 0.17764800  |
| P  | -0.91999300 | 2.21462800  | 0.07420000  |
| P  | -0.92136000 | -2.21424200 | 0.07415000  |
| C  | -2.38952100 | 0.00066100  | -0.57857400 |
| O  | -2.45300300 | 2.39934600  | -0.59064900 |
| C  | -1.12121900 | 3.07224100  | 1.75024800  |

|   |             |             |             |
|---|-------------|-------------|-------------|
| C | 0.10896700  | 3.20666700  | -1.17548500 |
| O | -2.45434400 | -2.39798900 | -0.59103800 |
| C | -1.12345400 | -3.07162700 | 1.75021600  |
| C | 0.10717000  | -3.20707400 | -1.17523600 |
| C | -3.07967400 | 1.18719200  | -0.86303200 |
| C | -3.08033400 | -1.18544100 | -0.86322400 |
| C | -1.50727600 | 4.55812100  | 1.64137400  |
| C | 0.17433000  | 2.90378600  | 2.57299800  |
| C | -2.26215600 | 2.30853500  | 2.46168800  |
| C | 1.47285100  | 3.60830900  | -0.58261000 |
| C | -0.63745800 | 4.45552700  | -1.68774700 |
| C | 0.33965600  | 2.24424400  | -2.36439100 |
| C | -2.26367400 | -2.30685500 | 2.46166100  |
| C | -1.51090600 | -4.55715000 | 1.64137800  |
| C | 0.17228000  | -2.90440400 | 2.57292700  |
| C | 0.33844400  | -2.24501700 | -2.36433000 |
| C | -0.63985800 | -4.45566200 | -1.68728400 |
| C | 1.47079600  | -3.60928400 | -0.58215300 |
| C | -4.36557300 | 1.21747100  | -1.40333300 |
| C | -4.36624900 | -1.21491400 | -1.40352800 |
| H | -1.74425600 | 4.93981400  | 2.64318600  |
| H | -2.38947400 | 4.70593400  | 1.00993500  |
| H | -0.68837800 | 5.16788100  | 1.24813100  |
| H | -0.01512000 | 3.24052100  | 3.60061800  |
| H | 0.99781000  | 3.50670700  | 2.17979600  |
| H | 0.50417800  | 1.86110100  | 2.60436700  |
| H | -3.20846700 | 2.38607900  | 1.91818800  |
| H | -2.40599100 | 2.73929400  | 3.46068700  |
| H | -2.02233300 | 1.24721600  | 2.58505700  |
| H | 1.37689900  | 4.36597400  | 0.20103200  |
| H | 2.09175000  | 4.03874000  | -1.38020400 |
| H | 2.01704400  | 2.75087200  | -0.17582200 |
| H | -1.61340600 | 4.19706000  | -2.10634800 |
| H | -0.03699200 | 4.91739900  | -2.48225800 |
| H | -0.78752500 | 5.20792200  | -0.90988900 |
| H | 0.86958300  | 2.78434400  | -3.16003200 |
| H | -0.60496100 | 1.87895300  | -2.78196200 |
| H | 0.95066900  | 1.38497300  | -2.07351200 |
| H | -2.40787400 | -2.73745800 | 3.46067500  |
| H | -3.21006800 | -2.38355800 | 1.91818800  |
| H | -2.02289700 | -1.24574800 | 2.58499600  |
| H | -2.39322700 | -4.70415300 | 1.00992000  |
| H | -1.74828700 | -4.93857900 | 2.64319600  |
| H | -0.69257600 | -5.16771100 | 1.24819400  |
| H | -0.01740900 | -3.24110800 | 3.60051400  |
| H | 0.50306700  | -1.86202000 | 2.60439400  |
| H | 0.99520500  | -3.50799900 | 2.17959000  |
| H | 0.94983300  | -1.38597100 | -2.07357700 |
| H | -0.60595900 | -1.87938000 | -2.78208500 |
| H | 0.86820300  | -2.78554500 | -3.15979200 |
| H | -1.61570400 | -4.19680500 | -2.10588100 |
| H | -0.79022700 | -5.20788100 | -0.90931400 |
| H | -0.03964100 | -4.91792600 | -2.48175600 |
| H | 2.08947700  | -4.04037000 | -1.37956300 |
| H | 1.37436500  | -4.36659600 | 0.20177100  |
| H | 2.01546400  | -2.75201100 | -0.17565900 |
| H | -4.85054100 | 2.16747900  | -1.60338100 |
| C | -4.99893700 | 0.00147600  | -1.67112800 |

|   |             |             |             |
|---|-------------|-------------|-------------|
| H | -4.85174800 | -2.16461900 | -1.60372600 |
| H | -6.00068700 | 0.00178800  | -2.09200500 |
| H | 7.09334600  | -0.00158100 | -2.14613100 |
| C | 6.35096700  | -0.00138400 | -1.35293600 |
| C | 6.76614700  | -0.00123700 | -0.01878500 |
| C | 4.98639500  | -0.00128200 | -1.69066600 |
| C | 5.83651000  | -0.00098000 | 1.03516400  |
| H | 7.82782800  | -0.00132200 | 0.21194800  |
| C | 4.07975400  | -0.00103100 | -0.64521600 |
| H | 4.65232300  | -0.00139600 | -2.72367300 |
| C | 4.49483100  | -0.00087900 | 0.69300300  |
| H | 6.14845400  | -0.00086500 | 2.07476600  |
| O | 2.70714400  | -0.00089100 | -0.69526300 |
| O | 3.40183400  | -0.00063600 | 1.51680000  |
| B | 2.25990600  | -0.00064700 | 0.66676200  |
| O | 1.01900800  | -0.00045700 | 1.07993000  |

**[Ni]OCH<sub>2</sub>OBcat**

|    | x           | y           | z           |
|----|-------------|-------------|-------------|
| C  | 5.34691900  | 0.43088400  | -0.49227900 |
| C  | 4.05660300  | -0.07071300 | -0.31958200 |
| C  | 2.92299800  | 0.74100600  | -0.17488600 |
| C  | 3.16180500  | 2.12113600  | -0.19784700 |
| C  | 4.42966400  | 2.67958600  | -0.36826100 |
| C  | 5.51834400  | 1.81715500  | -0.51640800 |
| H  | 6.18670300  | -0.24831800 | -0.59837000 |
| H  | 4.55259100  | 3.75783200  | -0.38116600 |
| H  | 6.51437600  | 2.23072100  | -0.64919100 |
| O  | 2.08268500  | 2.97935300  | -0.04282700 |
| O  | 3.88991800  | -1.45350200 | -0.28334500 |
| P  | 0.59385000  | 2.19006000  | 0.02358500  |
| P  | 2.30168800  | -1.90599400 | 0.02712400  |
| C  | -0.12167400 | 2.96335700  | 1.60479800  |
| C  | -0.18267800 | 2.86267400  | -1.57414500 |
| C  | 2.48161700  | -2.83180000 | 1.66993000  |
| C  | 1.98195000  | -3.03270000 | -1.46479600 |
| H  | -1.98852100 | -2.05695500 | 0.34741700  |
| C  | -1.54364000 | -1.10508000 | 0.01217900  |
| O  | -0.42473600 | -0.81512200 | 0.68432600  |
| O  | -2.58741500 | -0.07197500 | 0.24999000  |
| C  | -6.83587500 | -2.27485600 | -0.45152500 |
| C  | -5.81831900 | -1.37541000 | -0.18877300 |
| C  | -6.07679000 | -0.04350100 | 0.15120200  |
| C  | -7.36715700 | 0.44771000  | 0.24363900  |
| C  | -8.40942600 | -0.45598500 | -0.02084200 |
| C  | -8.15014800 | -1.78713100 | -0.36068900 |
| H  | -6.62195300 | -3.30577500 | -0.71395200 |
| H  | -7.55691600 | 1.48260600  | 0.50881500  |
| H  | -9.43731300 | -0.11030100 | 0.04115100  |
| H  | -8.97917900 | -2.46032000 | -0.55900800 |
| O  | -4.88749100 | 0.61807800  | 0.35582900  |
| O  | -4.45575400 | -1.58494100 | -0.20785200 |
| B  | -3.89194300 | -0.34538500 | 0.13629800  |
| H  | -1.43005800 | -1.13290200 | -1.08659200 |
| Ni | 1.18234100  | 0.01930500  | 0.10942800  |
| C  | 0.77633300  | 2.44156000  | -2.71206900 |
| H  | 0.90673000  | 1.35476000  | -2.75381900 |
| H  | 0.34913800  | 2.76651700  | -3.66951300 |



|   |             |             |             |
|---|-------------|-------------|-------------|
| H | 1.76353800  | 2.90010100  | -2.60845300 |
| C | -1.55661800 | 2.21549400  | -1.83196000 |
| H | -2.29618800 | 2.46004400  | -1.06725800 |
| H | -1.93773100 | 2.57573200  | -2.79680200 |
| H | -1.48628600 | 1.12560400  | -1.88531700 |
| C | -0.30548700 | 4.39790800  | -1.57223500 |
| H | -0.61595300 | 4.73213500  | -2.57104100 |
| H | -1.05985400 | 4.75031100  | -0.86270000 |
| H | 0.64886000  | 4.88025500  | -1.33949600 |
| C | 0.37008000  | 4.40816100  | 1.82555500  |
| H | -0.00584100 | 5.10008900  | 1.06778600  |
| H | 0.00150000  | 4.75417000  | 2.80018600  |
| H | 1.46110300  | 4.46932900  | 1.83163200  |
| C | -1.66108600 | 2.91722000  | 1.60448200  |
| H | -2.02001100 | 3.20918700  | 2.60017200  |
| H | -2.09255800 | 3.62262200  | 0.88669700  |
| H | -2.04613200 | 1.91785700  | 1.38691100  |
| C | 0.40670900  | 2.07449000  | 2.75578100  |
| H | 0.03088500  | 1.05011700  | 2.67337900  |
| H | 1.50242800  | 2.04535600  | 2.77696000  |
| H | 0.06663200  | 2.49162300  | 3.71281800  |
| C | 3.01653600  | -1.77323000 | 2.66375400  |
| H | 3.99700100  | -1.38909500 | 2.36629100  |
| H | 2.32914200  | -0.92662900 | 2.76263700  |
| H | 3.12085100  | -2.23993700 | 3.65157500  |
| C | 1.09941200  | -3.31326700 | 2.16003800  |
| H | 1.19403600  | -3.65386700 | 3.19945500  |
| H | 0.35750100  | -2.51024700 | 2.11792100  |
| H | 0.72509100  | -4.15793400 | 1.57447500  |
| C | 3.47651700  | -4.00461300 | 1.60390400  |
| H | 3.65211100  | -4.38109200 | 2.62025600  |
| H | 3.08912200  | -4.84001800 | 1.01252100  |
| H | 4.44198900  | -3.69882300 | 1.18818800  |
| C | 0.75770500  | -3.93639900 | -1.22595800 |
| H | 0.47914700  | -4.41847100 | -2.17187200 |
| H | 0.97099600  | -4.73141000 | -0.50503300 |
| H | -0.11086400 | -3.37413900 | -0.86996100 |
| C | 3.20903700  | -3.88816900 | -1.84012300 |
| H | 3.43925700  | -4.64359200 | -1.08509600 |
| H | 2.99630300  | -4.41525600 | -2.77949700 |
| H | 4.09856600  | -3.27089900 | -1.98985900 |
| C | 1.68042600  | -2.06804000 | -2.63581400 |
| H | 0.77799700  | -1.47550800 | -2.45136700 |
| H | 2.51048800  | -1.37716700 | -2.81799200 |
| H | 1.52217600  | -2.65272600 | -3.55138100 |

**[Ni]OCH<sub>3</sub>**

|    | x           | y           | z           |
|----|-------------|-------------|-------------|
| Ni | -0.03901800 | -0.38592800 | -0.01218200 |
| P  | -2.21980800 | -0.07520900 | 0.00997000  |
| P  | 2.19347600  | -0.09551900 | -0.02744200 |
| C  | -0.02454000 | 1.52151600  | 0.11514200  |
| O  | -2.42357100 | 1.58474300  | 0.20111500  |
| C  | -3.12971100 | -0.38485600 | -1.62335500 |
| C  | -3.13143600 | -0.72520400 | 1.53679700  |
| O  | 2.36703700  | 1.57943500  | 0.02024800  |
| C  | 3.01643000  | -0.50057000 | -1.68364300 |
| C  | 3.28011600  | -0.53809200 | 1.47657200  |

|   |             |             |             |
|---|-------------|-------------|-------------|
| C | -1.20831500 | 2.26859400  | 0.20110500  |
| C | 1.16004400  | 2.26612500  | 0.10697100  |
| C | -4.60142200 | 0.06576000  | -1.59199100 |
| C | -3.01845800 | -1.87298900 | -2.01873300 |
| C | -2.36835700 | 0.46269600  | -2.66956800 |
| C | -3.44308800 | -2.22570300 | 1.37464300  |
| C | -4.41367600 | 0.06786600  | 1.85755100  |
| C | -2.13425000 | -0.54299500 | 2.70493600  |
| C | 2.23046000  | 0.30812300  | -2.74157700 |
| C | 4.50265800  | -0.11007800 | -1.76321800 |
| C | 2.82755500  | -2.00450900 | -1.97593800 |
| C | 2.34651800  | -0.37182800 | 2.69773500  |
| C | 4.47592600  | 0.42317800  | 1.63865800  |
| C | 3.78785000  | -1.99046900 | 1.42239500  |
| C | -1.23459400 | 3.66125200  | 0.28146500  |
| C | 1.19645400  | 3.65922100  | 0.18345400  |
| H | -5.01284500 | 0.01738400  | -2.60899400 |
| H | -4.70504600 | 1.09616500  | -1.23688100 |
| H | -5.21682900 | -0.58494000 | -0.96335000 |
| H | -3.32428600 | -1.98232500 | -3.06777000 |
| H | -3.67841300 | -2.50607700 | -1.41905100 |
| H | -1.99619500 | -2.24567200 | -1.90166400 |
| H | -2.38731300 | 1.52999500  | -2.42936000 |
| H | -2.84588700 | 0.32601300  | -3.64822100 |
| H | -1.32362000 | 0.14800100  | -2.75795600 |
| H | -4.26978300 | -2.39848900 | 0.67830800  |
| H | -3.74441400 | -2.63607300 | 2.34737200  |
| H | -2.56869200 | -2.78054400 | 1.02138100  |
| H | -4.20913700 | 1.13682700  | 1.96344700  |
| H | -4.82437900 | -0.29685400 | 2.80831500  |
| H | -5.18655200 | -0.05860100 | 1.09572100  |
| H | -2.61475600 | -0.86217300 | 3.63916600  |
| H | -1.83048600 | 0.50253100  | 2.82332600  |
| H | -1.23362600 | -1.14794900 | 2.55997800  |
| H | 2.63443000  | 0.07626600  | -3.73550100 |
| H | 2.31988100  | 1.38635700  | -2.58033300 |
| H | 1.16702100  | 0.04725000  | -2.74171300 |
| H | 4.65914900  | 0.94335800  | -1.50971200 |
| H | 4.85945300  | -0.26446200 | -2.79010200 |
| H | 5.12775700  | -0.72327100 | -1.10703500 |
| H | 3.15715500  | -2.21208400 | -3.00237800 |
| H | 1.77677100  | -2.30037700 | -1.88546300 |
| H | 3.42213500  | -2.63549800 | -1.30864800 |
| H | 1.50900500  | -1.07633000 | 2.66639000  |
| H | 1.93612500  | 0.64175900  | 2.75867600  |
| H | 2.91614800  | -0.55960700 | 3.61734800  |
| H | 4.15251400  | 1.46543000  | 1.68358200  |
| H | 5.20452600  | 0.32762300  | 0.82985200  |
| H | 4.99221600  | 0.18344700  | 2.57778900  |
| H | 4.28731200  | -2.22621300 | 2.37117100  |
| H | 4.51994500  | -2.14381900 | 0.62334900  |
| H | 2.97614300  | -2.71116200 | 1.29020200  |
| H | -2.18194100 | 4.18704900  | 0.34564100  |
| C | -0.01670000 | 4.34662100  | 0.27232400  |
| H | 2.14698600  | 4.18321800  | 0.17281300  |
| H | -0.01327600 | 5.43157600  | 0.33371500  |
| H | 0.27681200  | -3.08044900 | 1.55036500  |
| H | -0.20959900 | -4.20139300 | 0.26803900  |

|   |             |             |             |
|---|-------------|-------------|-------------|
| C | 0.30108300  | -3.23929400 | 0.45388500  |
| H | 1.36291300  | -3.39643300 | 0.18033100  |
| O | -0.31135500 | -2.22651700 | -0.27669200 |

**[Ni]OCHO**

|    | x           | y           | z           |
|----|-------------|-------------|-------------|
| C  | -1.21712500 | 3.76320900  | -0.29664300 |
| C  | -1.18749300 | 2.37225900  | -0.19366800 |
| C  | -0.00018000 | 1.62903700  | -0.14219500 |
| C  | 1.18705200  | 2.37241300  | -0.19326300 |
| C  | 1.21650700  | 3.76337500  | -0.29623700 |
| C  | -0.00034300 | 4.44794000  | -0.34827100 |
| H  | -2.16643200 | 4.28783400  | -0.33217100 |
| H  | 2.16575600  | 4.28812800  | -0.33145000 |
| H  | -0.00040300 | 5.53155400  | -0.42791700 |
| O  | 2.39882500  | 1.68966100  | -0.13638200 |
| O  | -2.39919600 | 1.68930700  | -0.13721000 |
| P  | 2.21038200  | 0.02560200  | 0.01739400  |
| P  | -2.21049600 | 0.02536400  | 0.01724100  |
| C  | 3.18747400  | -0.56438200 | -1.49781200 |
| C  | 3.07059700  | -0.31422300 | 1.66847900  |
| C  | -3.18750200 | -0.56538900 | -1.49767400 |
| C  | -3.07061800 | -0.31400500 | 1.66851200  |
| H  | 0.00080300  | -2.82373700 | -1.52588100 |
| Ni | -0.00010400 | -0.26274600 | 0.02562700  |
| C  | 2.29499800  | 0.52786800  | 2.70840800  |
| H  | 1.23942900  | 0.24050000  | 2.75530700  |
| H  | 2.73375500  | 0.35435800  | 3.69904200  |
| H  | 2.35136800  | 1.59953300  | 2.49532100  |
| C  | 4.55091300  | 0.10698900  | 1.68734500  |
| H  | 4.93121300  | 0.02715100  | 2.71404300  |
| H  | 5.17064300  | -0.54227400 | 1.06186000  |
| H  | 4.68608400  | 1.14290900  | 1.36008400  |
| C  | 2.92380000  | -1.80805800 | 2.03230400  |
| H  | 3.26021400  | -1.95039900 | 3.06750100  |
| H  | 1.88780800  | -2.15161500 | 1.95449900  |
| H  | 3.54007500  | -2.45223400 | 1.39925800  |
| C  | 4.46119500  | 0.27064000  | -1.74193800 |
| H  | 5.21085200  | 0.13046500  | -0.95993800 |
| H  | 4.91070700  | -0.04769700 | -2.69149400 |
| H  | 4.23518100  | 1.33774600  | -1.81337800 |
| C  | 3.54564600  | -2.05902500 | -1.38094600 |
| H  | 3.93520500  | -2.40573400 | -2.34667700 |
| H  | 4.32566900  | -2.23611900 | -0.63422800 |
| H  | 2.68294800  | -2.68441800 | -1.13058000 |
| C  | 2.23167000  | -0.35960300 | -2.69625500 |
| H  | 1.33442200  | -0.98119500 | -2.61214300 |
| H  | 1.91649300  | 0.68483000  | -2.79154200 |
| H  | 2.75139900  | -0.64022000 | -3.62129400 |
| C  | -2.23183500 | -0.36072100 | -2.69625100 |
| H  | -1.91697700 | 0.68377800  | -2.79188600 |
| H  | -1.33439500 | -0.98202000 | -2.61201200 |
| H  | -2.75154600 | -0.64178300 | -3.62116400 |
| C  | -3.54516100 | -2.06010800 | -1.38025200 |
| H  | -3.93453200 | -2.40734400 | -2.34586800 |
| H  | -2.68222600 | -2.68505500 | -1.12959600 |
| H  | -4.32515400 | -2.23718500 | -0.63350400 |
| C  | -4.46147700 | 0.26917200  | -1.74204400 |

|   |             |             |             |
|---|-------------|-------------|-------------|
| H | -4.91096800 | -0.04968300 | -2.69143400 |
| H | -5.21105000 | 0.12916200  | -0.95993400 |
| H | -4.23573700 | 1.33630900  | -1.81394000 |
| C | -4.55102900 | 0.10687400  | 1.68723700  |
| H | -4.93129000 | 0.02733400  | 2.71397400  |
| H | -4.68642200 | 1.14265000  | 1.35960600  |
| H | -5.17063700 | -0.54274500 | 1.06200600  |
| C | -2.92347800 | -1.80766800 | 2.03290100  |
| H | -3.25974500 | -1.94967900 | 3.06819200  |
| H | -3.53968500 | -2.45222500 | 1.40017500  |
| H | -1.88743200 | -2.15105900 | 1.95508200  |
| C | -2.29522600 | 0.52867300  | 2.70810600  |
| H | -1.23957400 | 0.24162700  | 2.75511500  |
| H | -2.35188300 | 1.60024300  | 2.49462000  |
| H | -2.73392700 | 0.35542300  | 3.69881200  |
| O | -0.00000400 | -2.12758200 | 0.39142300  |
| C | 0.00082100  | -3.12517700 | -0.44965900 |
| O | 0.00154700  | -4.30829500 | -0.15216200 |

9-BBN reductant

**9-BBN**

|   | x           | y           | z           |
|---|-------------|-------------|-------------|
| C | -0.00188900 | 1.30492100  | 0.70871200  |
| C | 1.32332700  | 1.29539700  | -0.10488400 |
| C | 1.60678400  | -0.00004200 | -0.89416700 |
| C | 1.32326600  | -1.29545300 | -0.10484900 |
| C | -0.00195800 | -1.30489200 | 0.70873400  |
| H | 1.34629600  | 2.15296200  | -0.79363900 |
| H | -0.02297600 | 2.22890800  | 1.30126600  |
| H | 1.02706300  | -0.00004200 | -1.82177600 |
| H | 2.65898500  | -0.00006900 | -1.20925000 |
| H | 1.34618900  | -2.15303200 | -0.79358600 |
| H | 2.14814900  | -1.46177200 | 0.60384400  |
| H | -0.02308100 | -2.22884700 | 1.30134100  |
| H | 2.14821900  | 1.46169400  | 0.60380600  |
| C | -1.30036500 | -1.29547000 | -0.16616100 |
| H | -1.28638300 | -2.15654200 | -0.85035400 |
| H | -2.15824800 | -1.45998700 | 0.50263100  |
| C | -1.30032600 | 1.29549900  | -0.16616000 |
| H | -1.28635600 | 2.15657500  | -0.85035100 |
| C | -1.54403800 | 0.00002000  | -0.97034000 |
| H | -2.15819000 | 1.46002700  | 0.50265600  |
| H | -0.92036700 | 0.00001900  | -1.86876900 |
| H | -2.58014600 | 0.00004000  | -1.33494400 |
| B | -0.10484200 | 0.00002900  | 1.57750900  |
| H | -0.34375300 | 0.00003800  | 2.75427000  |

**BBNOBBN**

|   | x           | y           | z           |
|---|-------------|-------------|-------------|
| O | 0.00008400  | 0.00440900  | -0.00622400 |
| C | -2.22400700 | -0.91843900 | -0.93946700 |
| C | -3.06198800 | -1.84643400 | -0.01078500 |
| C | -3.85562800 | -1.12513500 | 1.10159500  |
| C | -3.06350800 | -0.02698600 | 1.84552700  |
| C | -2.22341600 | 0.91808100  | 0.93662000  |
| H | -3.75497800 | -2.45473700 | -0.61092800 |
| H | -1.61673900 | -1.55823300 | -1.59463800 |
| H | -4.77018900 | -0.69621800 | 0.68181300  |
| H | -4.19476300 | -1.87129200 | 1.83274400  |

|   |             |             |             |
|---|-------------|-------------|-------------|
| H | -3.75764600 | 0.56154100  | 2.46385900  |
| H | -2.37170400 | -0.51146500 | 2.55045400  |
| H | -1.61640400 | 1.55911700  | 1.59077800  |
| H | -2.36889500 | -2.55993600 | 0.45928000  |
| C | -3.06627400 | 1.84421400  | 0.01079300  |
| H | -3.75908900 | 2.45008400  | 0.61353100  |
| H | -2.37674100 | 2.55978000  | -0.46124200 |
| C | -3.06830000 | 0.02470800  | -1.84615300 |
| H | -3.76263200 | -0.56487900 | -2.46327100 |
| C | -3.86131000 | 1.12098000  | -1.09969200 |
| H | -2.37909800 | 0.51120900  | -2.55228700 |
| H | -4.77339300 | 0.68953900  | -0.67725900 |
| H | -4.20442700 | 1.86659500  | -1.82951800 |
| B | -1.34635300 | 0.00229000  | -0.00375600 |
| C | 2.22051700  | -0.93044600 | 0.92401200  |
| C | 3.07027400  | -1.84539000 | -0.00547000 |
| C | 3.86683600  | -1.11017100 | -1.10671700 |
| C | 3.07462000  | -0.00721400 | -1.84383700 |
| C | 2.22704400  | 0.92744100  | -0.93093600 |
| H | 3.76315000  | -2.45508200 | 0.59342700  |
| H | 1.61057100  | -1.57923300 | 1.56782200  |
| H | 4.77768200  | -0.68376300 | -0.67667900 |
| H | 4.21229800  | -1.84769400 | -1.84364200 |
| H | 3.77033600  | 0.58945100  | -2.45242100 |
| H | 2.38852800  | -0.48617900 | -2.55818400 |
| H | 1.62244900  | 1.57459000  | -1.58122200 |
| H | 2.38421300  | -2.55788000 | -0.48707500 |
| C | 3.06198400  | 1.84676900  | 0.00864100  |
| H | 3.75836800  | 2.45909000  | -0.58346300 |
| H | 2.36704100  | 2.55639900  | 0.48161500  |
| C | 3.05384700  | 0.00758100  | 1.84705400  |
| H | 3.74349100  | -0.58623000 | 2.46548400  |
| C | 3.84929200  | 1.11450200  | 1.11882100  |
| H | 2.35591400  | 0.48405400  | 2.55118300  |
| H | 4.76586800  | 0.69059700  | 0.69872800  |
| H | 4.18471600  | 1.85314800  | 1.85931000  |
| B | 1.34665200  | -0.00069200 | -0.00593000 |

**BBNOCH<sub>2</sub>OBBN**

|   | x           | y           | z           |
|---|-------------|-------------|-------------|
| H | -0.60790800 | -2.65647000 | 0.65882600  |
| C | -0.00004900 | -2.03065200 | -0.00033200 |
| O | 0.81300200  | -1.23422900 | 0.83423200  |
| O | -0.81285600 | -1.23367300 | -0.83447700 |
| H | 0.60770800  | -2.65638900 | -0.65965700 |
| C | -2.51818300 | -0.60373000 | 1.09329400  |
| C | -2.38545800 | 0.85746500  | 1.62513800  |
| C | -2.96653400 | 1.95632300  | 0.70728800  |
| C | -2.61976700 | 1.79029900  | -0.78903900 |
| C | -2.75409800 | 0.34016600  | -1.34263900 |
| H | -2.85055700 | 0.93397500  | 2.61900900  |
| H | -1.97095800 | -1.24573500 | 1.79606700  |
| H | -4.05266900 | 2.00011100  | 0.82944800  |
| H | -2.59704500 | 2.93218300  | 1.05034200  |
| H | -3.23748800 | 2.48029600  | -1.38290200 |
| H | -1.57876300 | 2.11053000  | -0.94592600 |
| H | -2.35023100 | 0.33376700  | -2.36394300 |
| H | -1.31441400 | 1.05333200  | 1.77883800  |

|   |             |             |             |
|---|-------------|-------------|-------------|
| C | -4.21193300 | -0.19931800 | -1.40108100 |
| H | -4.84210600 | 0.47595500  | -1.99880700 |
| H | -4.19139600 | -1.15247900 | -1.95027800 |
| C | -3.98012600 | -1.13338000 | 1.01189300  |
| H | -4.45678000 | -1.07026800 | 2.00130100  |
| C | -4.88276300 | -0.43586900 | -0.02976800 |
| H | -3.93360700 | -2.20649800 | 0.77176100  |
| H | -5.23929300 | 0.51612800  | 0.37430900  |
| H | -5.78554300 | -1.04392300 | -0.17721600 |
| B | -1.93001300 | -0.58581000 | -0.37153500 |
| C | 2.51712100  | -0.60213700 | -1.09388600 |
| C | 2.38547300  | 0.85971100  | -1.62421400 |
| C | 2.96759700  | 1.95724300  | -0.70541600 |
| C | 2.62131000  | 1.78994400  | 0.79089300  |
| C | 2.75454000  | 0.33913700  | 1.34292200  |
| H | 2.85043400  | 0.93685700  | -2.61809800 |
| H | 1.96909500  | -1.24296300 | -1.79710000 |
| H | 4.05371100  | 2.00049200  | -0.82796900 |
| H | 2.59858100  | 2.93368300  | -1.04735600 |
| H | 3.23991600  | 2.47875300  | 1.38520300  |
| H | 1.58066500  | 2.11094100  | 0.94855400  |
| H | 2.35106700  | 0.33197600  | 2.36437800  |
| H | 1.31455800  | 1.05658900  | -1.77747900 |
| C | 4.21197500  | -0.20169600 | 1.40030200  |
| H | 4.84290100  | 0.47236300  | 1.99860500  |
| H | 4.19077700  | -1.15545900 | 1.94842500  |
| C | 3.97867200  | -1.13304700 | -1.01353600 |
| H | 4.45503800  | -1.06930200 | -2.00304000 |
| C | 4.88217100  | -0.43728100 | 0.02853300  |
| H | 3.93144100  | -2.20637600 | -0.77446200 |
| H | 5.23927400  | 0.51487200  | -0.37465500 |
| H | 5.78455600  | -1.04614700 | 0.17505400  |
| B | 1.92965100  | -0.58552200 | 0.37126000  |

### CH<sub>3</sub>OBBN

|   | x           | y           | z           |
|---|-------------|-------------|-------------|
| H | -3.84689500 | 0.93826200  | -0.03885800 |
| H | -3.96142100 | -0.82613800 | -0.22430000 |
| C | -3.30692800 | -0.00635700 | 0.08996700  |
| H | -3.05590800 | -0.13363200 | 1.14762900  |
| O | -2.15822300 | -0.00105700 | -0.74674900 |
| C | 0.30056900  | 0.00248100  | -1.37741300 |
| C | 1.11234100  | 1.31382200  | -1.17104900 |
| C | 1.57279900  | 1.57937900  | 0.27948400  |
| C | 0.49474700  | 1.30933900  | 1.35240200  |
| C | -0.32055100 | -0.00656600 | 1.16984900  |
| H | 1.98957900  | 1.32793500  | -1.83532800 |
| H | -0.08184200 | 0.00356400  | -2.40693400 |
| H | 2.46354100  | 0.98298500  | 0.49789400  |
| H | 1.89758200  | 2.62545300  | 0.36336400  |
| H | 0.96497500  | 1.32336300  | 2.34701100  |
| H | -0.21988600 | 2.14617000  | 1.34814900  |
| H | -1.09612600 | -0.01090100 | 1.94824800  |
| H | 0.47765400  | 2.15165100  | -1.49602000 |
| C | 0.50903300  | -1.31355000 | 1.34842100  |
| H | 0.98243700  | -1.32428200 | 2.34159200  |
| H | -0.19698400 | -2.15763800 | 1.34495600  |
| C | 1.12027500  | -1.30467400 | -1.17657900 |

|   |             |             |             |
|---|-------------|-------------|-------------|
| H | 1.99576500  | -1.31209000 | -1.84324500 |
| C | 1.58653200  | -1.57105400 | 0.27189600  |
| H | 0.48962700  | -2.14545600 | -1.50189600 |
| H | 2.47286800  | -0.96785700 | 0.48963900  |
| H | 1.92037400  | -2.61460400 | 0.35152600  |
| B | -0.86849100 | -0.00304900 | -0.31626000 |

***cis*-HCOBBN**

|   | x           | y           | z           |
|---|-------------|-------------|-------------|
| C | 0.18350700  | 0.15963100  | 1.09604500  |
| C | -0.22694400 | 1.64329300  | 0.82976600  |
| C | -1.29731000 | 1.84678100  | -0.26638800 |
| C | -1.07652600 | 1.00335000  | -1.54248400 |
| C | -0.67768900 | -0.48802800 | -1.29675100 |
| H | -0.57445000 | 2.10256200  | 1.76646200  |
| H | 1.02312400  | 0.17782100  | 1.79900500  |
| H | -2.28948300 | 1.63819400  | 0.14399500  |
| H | -1.31630600 | 2.90847500  | -0.54649800 |
| H | -1.97926000 | 1.04584700  | -2.16907600 |
| H | -0.27670800 | 1.46824500  | -2.13750900 |
| H | -0.41808500 | -0.92681600 | -2.26917800 |
| H | 0.68551700  | 2.18573000  | 0.54651500  |
| C | -1.79441600 | -1.35951400 | -0.65508200 |
| H | -2.70174900 | -1.32404600 | -1.27561500 |
| H | -1.45517200 | -2.40564100 | -0.68095300 |
| C | -0.94026000 | -0.72605900 | 1.71184400  |
| H | -1.28665000 | -0.27958700 | 2.65523600  |
| C | -2.15745200 | -0.99368200 | 0.80050300  |
| H | -0.48961900 | -1.69137400 | 1.98751400  |
| H | -2.81961300 | -0.12313800 | 0.80678700  |
| H | -2.74937400 | -1.81128500 | 1.23328700  |
| B | 0.54286700  | -0.42492000 | -0.31479500 |
| H | 3.74135200  | -1.28690300 | -0.44247700 |
| O | 3.22374100  | 0.48526300  | 0.41645500  |
| C | 2.99004800  | -0.51958200 | -0.20106200 |
| O | 1.79805900  | -0.85409100 | -0.75418900 |

***trans*-HCOBBN**

|   | x           | y           | z           |
|---|-------------|-------------|-------------|
| C | -0.04520300 | 0.00034000  | 1.20630300  |
| C | -0.87880100 | 1.31359800  | 1.33908700  |
| C | -1.89660400 | 1.57621400  | 0.20779700  |
| C | -1.35302400 | 1.31098600  | -1.21292600 |
| C | -0.52648100 | -0.00019900 | -1.37092200 |
| H | -1.40154400 | 1.31917700  | 2.30627600  |
| H | 0.67982700  | 0.00059400  | 2.03052900  |
| H | -2.79544800 | 0.97669200  | 0.37703600  |
| H | -2.22844900 | 2.62097800  | 0.27119700  |
| H | -2.18824900 | 1.31505000  | -1.92811100 |
| H | -0.70509900 | 2.15038600  | -1.50494900 |
| H | -0.08457400 | -0.00030900 | -2.37553200 |
| H | -0.17057100 | 2.15461400  | 1.37740800  |
| C | -1.35260900 | -1.31160000 | -1.21246800 |
| H | -2.18783400 | -1.31618400 | -1.92764600 |
| H | -0.70442000 | -2.15090200 | -1.50419000 |
| C | -0.87835700 | -1.31317500 | 1.33953100  |
| H | -1.40106800 | -1.31861700 | 2.30673900  |
| C | -1.89609900 | -1.57649500 | 0.20835300  |

|   |             |             |             |
|---|-------------|-------------|-------------|
| H | -0.16984100 | -2.15394000 | 1.37810500  |
| H | -2.79512000 | -0.97718600 | 0.37738900  |
| H | -2.22762400 | -2.62133900 | 0.27212300  |
| B | 0.56858500  | 0.00011800  | -0.24706100 |
| H | 2.66726000  | 0.00068400  | 1.30614200  |
| O | 4.09883800  | 0.00001300  | -0.13495300 |
| C | 2.96309900  | 0.00024600  | 0.24565000  |
| O | 1.90795000  | 0.00001500  | -0.61875200 |

**IMA1-2**

|    | x           | y           | z           |
|----|-------------|-------------|-------------|
| C  | -4.69778400 | 0.99610800  | 0.83128700  |
| C  | -4.51273900 | 1.89223400  | -0.41700300 |
| C  | -4.79838300 | 1.20744500  | -1.77191800 |
| C  | -4.21570300 | -0.21738400 | -1.89744700 |
| C  | -4.40929200 | -1.12160700 | -0.65553000 |
| H  | -5.12906000 | 2.80378100  | -0.34434100 |
| H  | -4.36002100 | 1.58746900  | 1.70145500  |
| H  | -5.87862000 | 1.17754300  | -1.94703800 |
| H  | -4.39409700 | 1.83307400  | -2.58213900 |
| H  | -4.63684900 | -0.69119800 | -2.79954800 |
| H  | -3.13449200 | -0.13111200 | -2.08468800 |
| H  | -3.87242400 | -2.06294200 | -0.86010200 |
| H  | -3.46913300 | 2.23797100  | -0.42506800 |
| C  | -5.88546100 | -1.51381800 | -0.37995900 |
| H  | -6.33674600 | -1.98965500 | -1.26605800 |
| H  | -5.87879200 | -2.28139100 | 0.40728500  |
| C  | -6.17092300 | 0.60150700  | 1.11537600  |
| H  | -6.80845900 | 1.49646500  | 1.20285400  |
| C  | -6.80434900 | -0.35663800 | 0.07869800  |
| H  | -6.19635300 | 0.11196500  | 2.09958100  |
| H  | -7.13338200 | 0.21731300  | -0.79421000 |
| H  | -7.72491900 | -0.78189700 | 0.50442000  |
| B  | -3.88586000 | -0.39485100 | 0.68826900  |
| C  | 4.23124700  | 1.08515800  | -2.27625700 |
| C  | 3.14515500  | 1.09673300  | -1.40153200 |
| C  | 2.52520000  | -0.06665300 | -0.92316600 |
| C  | 3.08107600  | -1.27429400 | -1.36828400 |
| C  | 4.16627100  | -1.34424300 | -2.24207300 |
| C  | 4.73194300  | -0.15006500 | -2.69306400 |
| H  | 4.66680000  | 2.01975500  | -2.61411100 |
| H  | 4.55036900  | -2.30990900 | -2.55401300 |
| H  | 5.57674900  | -0.18231600 | -3.37529900 |
| O  | 2.52932100  | -2.46518900 | -0.91726700 |
| O  | 2.65801400  | 2.32830000  | -0.98076700 |
| P  | 1.23316700  | -2.25355600 | 0.12692300  |
| P  | 1.39243200  | 2.20255700  | 0.11129300  |
| C  | -0.09581500 | -3.24717400 | -0.79065900 |
| C  | 1.87773500  | -3.09498900 | 1.69895800  |
| C  | 0.08487000  | 3.26126300  | -0.75836400 |
| C  | 2.13792000  | 3.00930400  | 1.65509700  |
| H  | -2.10579000 | -0.09474200 | 2.54672800  |
| Ni | 1.05114400  | -0.00922400 | 0.27042100  |
| C  | 3.18585300  | -2.35532000 | 2.05993700  |
| H  | 3.01624900  | -1.28597900 | 2.22511100  |
| H  | 3.58621900  | -2.77834100 | 2.98995100  |
| H  | 3.94639000  | -2.46593000 | 1.28163900  |
| C  | 2.18899100  | -4.59041500 | 1.50399500  |



|   |             |             |             |
|---|-------------|-------------|-------------|
| H | 2.68982500  | -4.96922000 | 2.40445500  |
| H | 1.28236100  | -5.18561500 | 1.36185000  |
| H | 2.85709100  | -4.76066700 | 0.65390600  |
| C | 0.86576400  | -2.90251200 | 2.84853900  |
| H | 1.30226100  | -3.30450100 | 3.77184600  |
| H | 0.63437500  | -1.84653800 | 3.01548000  |
| H | -0.07410300 | -3.43301300 | 2.67331200  |
| C | 0.48228200  | -4.51052700 | -1.46223600 |
| H | 0.79503800  | -5.26784500 | -0.73965100 |
| H | -0.30360200 | -4.95574300 | -2.08545600 |
| H | 1.33305900  | -4.27523900 | -2.10633300 |
| C | -1.25910200 | -3.63144700 | 0.14308600  |
| H | -2.05778900 | -4.08021300 | -0.45989700 |
| H | -0.95956600 | -4.37245100 | 0.89095500  |
| H | -1.69685700 | -2.76773500 | 0.65069600  |
| C | -0.61516400 | -2.29383600 | -1.89247200 |
| H | -1.10268300 | -1.41195700 | -1.46848400 |
| H | 0.18968000  | -1.96803200 | -2.56097300 |
| H | -1.35859300 | -2.82573900 | -2.49894900 |
| C | -0.55491100 | 2.32545800  | -1.81045000 |
| H | 0.19324400  | 1.92543000  | -2.50394000 |
| H | -1.08441200 | 1.48816500  | -1.34687200 |
| H | -1.28374400 | 2.89668100  | -2.39892900 |
| C | -0.99207700 | 3.73310900  | 0.23667800  |
| H | -1.81431700 | 4.19433900  | -0.32294500 |
| H | -1.42040500 | 2.90709900  | 0.81251900  |
| H | -0.60685900 | 4.48384900  | 0.93357400  |
| C | 0.70532900  | 4.47222800  | -1.48531400 |
| H | -0.08962400 | 4.98314700  | -2.04322600 |
| H | 1.14532300  | 5.19935200  | -0.79873000 |
| H | 1.47497000  | 4.16362800  | -2.19727500 |
| C | 2.53371800  | 4.48179000  | 1.44063500  |
| H | 3.08348300  | 4.83439600  | 2.32301400  |
| H | 3.18534500  | 4.60579900  | 0.56993000  |
| H | 1.66185000  | 5.13140900  | 1.32093300  |
| C | 1.15649600  | 2.87958000  | 2.83943800  |
| H | 1.65756300  | 3.22953200  | 3.75108600  |
| H | 0.25772900  | 3.48753100  | 2.70668600  |
| H | 0.84457500  | 1.84329400  | 2.99904100  |
| C | 3.41128800  | 2.19288200  | 1.97627700  |
| H | 3.18436100  | 1.13559300  | 2.14910100  |
| H | 4.15283400  | 2.25705500  | 1.17471300  |
| H | 3.86429700  | 2.59321100  | 2.89188200  |
| O | -0.31807800 | 0.06027600  | 1.63880300  |
| C | -1.57649900 | -0.04136600 | 1.58556700  |
| O | -2.26982800 | -0.09899600 | 0.52964800  |
| H | -3.94011600 | -1.09759400 | 1.68752800  |

**IMA2-2**

|    | x           | y           | z           |
|----|-------------|-------------|-------------|
| Ni | 0.65374500  | -0.00281700 | 0.19383400  |
| P  | 0.97745000  | 2.27077400  | -0.02173400 |
| P  | 0.95870300  | -2.27804400 | -0.02084600 |
| O  | -1.32639600 | 0.00408100  | 0.71189300  |
| C  | 2.54539100  | -0.01088800 | -0.06611300 |
| O  | 2.64824900  | 2.38459900  | -0.07928600 |
| C  | 0.54807200  | 3.05346100  | -1.71522200 |
| C  | 0.66874700  | 3.44275700  | 1.43994200  |

|   |             |             |             |
|---|-------------|-------------|-------------|
| O | 2.62861200  | -2.40717200 | -0.07102400 |
| C | 0.52971000  | -3.05254700 | -1.71771100 |
| C | 0.63229300  | -3.44858500 | 1.43810600  |
| C | -1.44110400 | 0.00666000  | 2.02719100  |
| C | 3.30319500  | 1.16792500  | -0.12147900 |
| C | 3.29367200  | -1.19602600 | -0.11719500 |
| C | 1.60304500  | 4.09546300  | -2.14352600 |
| C | -0.85001600 | 3.69557800  | -1.72297700 |
| C | 0.56652200  | 1.89178100  | -2.73242500 |
| C | -0.83277400 | 3.54417000  | 1.77120200  |
| C | 1.24403200  | 4.85071600  | 1.18930300  |
| C | 1.40898900  | 2.80637500  | 2.64031700  |
| C | 0.58008900  | -1.89115900 | -2.73433000 |
| C | 1.56736800  | -4.11495500 | -2.13792000 |
| C | -0.88103000 | -3.66591100 | -1.73668900 |
| C | 1.37390300  | -2.82051700 | 2.64205000  |
| C | 1.19400200  | -4.86225100 | 1.18894300  |
| C | -0.87151800 | -3.53568500 | 1.76295100  |
| O | -0.48352100 | 0.00516600  | 2.78550400  |
| H | -2.47476900 | 0.01016000  | 2.38984700  |
| C | 4.69520000  | 1.19176100  | -0.21908200 |
| C | 4.68541000  | -1.23155300 | -0.21466200 |
| H | 1.34146900  | 4.45088300  | -3.14864900 |
| H | 2.60643700  | 3.66584700  | -2.18535500 |
| H | 1.63262700  | 4.96536000  | -1.48391300 |
| H | -1.08770100 | 4.00334900  | -2.74935500 |
| H | -0.90066900 | 4.59134700  | -1.09645300 |
| H | -1.62858500 | 2.99855800  | -1.40375400 |
| H | 1.52928400  | 1.37004000  | -2.74158000 |
| H | 0.39566000  | 2.29717000  | -3.73835400 |
| H | -0.22225900 | 1.16397100  | -2.52259500 |
| H | -1.41778200 | 3.99321000  | 0.96496400  |
| H | -0.95126000 | 4.17951800  | 2.65815100  |
| H | -1.26630200 | 2.57127100  | 2.00780100  |
| H | 2.29581500  | 4.81476900  | 0.89100000  |
| H | 1.18007300  | 5.42429000  | 2.12303200  |
| H | 0.68041400  | 5.40235800  | 0.43093400  |
| H | 1.23565800  | 3.43184500  | 3.52552500  |
| H | 2.48835700  | 2.75945600  | 2.46854200  |
| H | 1.03995900  | 1.80116500  | 2.86122700  |
| H | 0.40910400  | -2.29300200 | -3.74164300 |
| H | 1.55324900  | -1.38901800 | -2.73559500 |
| H | -0.19534500 | -1.14752600 | -2.53079400 |
| H | 2.58003200  | -3.70640100 | -2.16614800 |
| H | 1.31041200  | -4.46080200 | -3.14756000 |
| H | 1.57057400  | -4.98800100 | -1.48189800 |
| H | -1.11727000 | -3.96847000 | -2.76495000 |
| H | -1.64731500 | -2.95308000 | -1.42270300 |
| H | -0.95449500 | -4.56066700 | -1.11096900 |
| H | 1.01459800  | -1.81155700 | 2.86198400  |
| H | 2.45441900  | -2.78479400 | 2.47492900  |
| H | 1.19017300  | -3.44456600 | 3.52615700  |
| H | 2.24662100  | -4.83730900 | 0.89249600  |
| H | 0.62588600  | -5.40827700 | 0.42985300  |
| H | 1.12245900  | -5.43479800 | 2.12274900  |
| H | -0.99974400 | -4.16952600 | 2.64962100  |
| H | -1.45700800 | -3.97976600 | 0.95428000  |
| H | -1.29758300 | -2.55887100 | 1.99687400  |

|   |             |             |             |
|---|-------------|-------------|-------------|
| H | 5.21600500  | 2.14299100  | -0.25502000 |
| C | 5.37973100  | -0.02276100 | -0.26316600 |
| H | 5.19848000  | -2.18709500 | -0.24732600 |
| H | 6.46356700  | -0.02726800 | -0.33740200 |
| C | -3.58795600 | -1.28747700 | -0.21322300 |
| C | -4.47197000 | -1.28672400 | 1.05979000  |
| C | -5.24840200 | 0.02237300  | 1.33422500  |
| C | -4.45956200 | 1.32291300  | 1.05444600  |
| C | -3.57579200 | 1.31030300  | -0.21869200 |
| H | -5.19567100 | -2.11652200 | 1.02062700  |
| H | -3.03596500 | -2.23955800 | -0.19616800 |
| H | -6.16363100 | 0.02550000  | 0.73448100  |
| H | -5.59153500 | 0.02617000  | 2.37879200  |
| H | -5.17534800 | 2.15940800  | 1.01217300  |
| H | -3.82015700 | 1.54805300  | 1.92147800  |
| H | -3.01449400 | 2.25701700  | -0.20499400 |
| H | -3.83489200 | -1.51454900 | 1.92784300  |
| C | -4.41071400 | 1.31686500  | -1.53083300 |
| H | -5.11685900 | 2.16266700  | -1.53579000 |
| H | -3.71836500 | 1.49119200  | -2.36648600 |
| C | -4.42304100 | -1.29104400 | -1.52539300 |
| H | -5.13715200 | -2.13013100 | -1.52694100 |
| C | -5.19947400 | 0.01602600  | -1.81141400 |
| H | -3.73248900 | -1.47532000 | -2.36040900 |
| H | -6.12601400 | 0.02162600  | -1.22802200 |
| H | -5.52268900 | 0.01533500  | -2.86213000 |
| B | -2.61712400 | 0.00669500  | -0.35030200 |
| H | -1.97119900 | 0.00116400  | -1.38474500 |

**IMA3-2**

|   | x           | y           | z           |
|---|-------------|-------------|-------------|
| C | -4.27078300 | -1.22194900 | 0.21325200  |
| C | -5.42122800 | -0.82078900 | 1.17083800  |
| C | -6.15910900 | 0.48679000  | 0.80727800  |
| C | -5.22964500 | 1.64289000  | 0.37823700  |
| C | -4.08250000 | 1.24546600  | -0.58403700 |
| H | -6.16194700 | -1.63309500 | 1.25302400  |
| H | -3.79451100 | -2.10890400 | 0.66395400  |
| H | -6.88516800 | 0.28833300  | 0.01203000  |
| H | -6.75947900 | 0.81049000  | 1.67032900  |
| H | -5.84522700 | 2.44750100  | -0.05682000 |
| H | -4.77074800 | 2.06968500  | 1.28207800  |
| H | -3.46896400 | 2.14935200  | -0.72685800 |
| H | -4.98946800 | -0.70393900 | 2.17518300  |
| C | -4.55392100 | 0.81958900  | -1.99876200 |
| H | -5.16688300 | 1.61042600  | -2.46156100 |
| H | -3.65853000 | 0.72236000  | -2.63139200 |
| C | -4.73991900 | -1.64648200 | -1.20144200 |
| H | -5.47412300 | -2.46679100 | -1.14142600 |
| C | -5.33771500 | -0.51103900 | -2.06258900 |
| H | -3.86798400 | -2.05847200 | -1.73200900 |
| H | -6.37665200 | -0.33703500 | -1.76391400 |
| H | -5.39102900 | -0.84500500 | -3.10928700 |
| B | -3.22396400 | 0.00675500  | 0.01812400  |
| C | 4.25476300  | 1.10585100  | -2.15999900 |
| C | 3.11297700  | 1.10924800  | -1.35905500 |
| C | 2.50005700  | -0.05700300 | -0.87757600 |
| C | 3.13126600  | -1.25792400 | -1.23470600 |

|    |             |             |             |
|----|-------------|-------------|-------------|
| C  | 4.27470400  | -1.31869100 | -2.03184400 |
| C  | 4.82655600  | -0.12300800 | -2.49425800 |
| H  | 4.67855900  | 2.04419600  | -2.50239600 |
| H  | 4.71199200  | -2.28088600 | -2.27744700 |
| H  | 5.71561200  | -0.14871800 | -3.11801300 |
| O  | 2.59919800  | -2.45179800 | -0.77271600 |
| O  | 2.56668500  | 2.33768000  | -1.01391600 |
| P  | 1.19959000  | -2.25643400 | 0.13147100  |
| P  | 1.27527000  | 2.21614200  | 0.04649500  |
| C  | -0.00401000 | -3.27735900 | -0.91323100 |
| C  | 1.71219600  | -3.07076700 | 1.76652600  |
| C  | 0.00041100  | 3.27406900  | -0.86971500 |
| C  | 1.98713200  | 3.04203600  | 1.60085600  |
| H  | -1.60505700 | 0.55325800  | 3.11821600  |
| Ni | 0.95600400  | -0.01013400 | 0.22519300  |
| C  | 2.94514700  | -2.27425200 | 2.25145400  |
| H  | 2.71477300  | -1.21229600 | 2.38800500  |
| H  | 3.26577200  | -2.67496300 | 3.22143900  |
| H  | 3.78525700  | -2.35724400 | 1.55579800  |
| C  | 2.10482700  | -4.55225800 | 1.61494300  |
| H  | 2.55701500  | -4.89637100 | 2.55424800  |
| H  | 1.23759800  | -5.18975200 | 1.42047600  |
| H  | 2.83775500  | -4.70280200 | 0.81635900  |
| C  | 0.58477400  | -2.92123900 | 2.80910800  |
| H  | 0.94025600  | -3.31574000 | 3.76972300  |
| H  | 0.30520600  | -1.87429400 | 2.95358400  |
| H  | -0.31455500 | -3.48071200 | 2.53777800  |
| C  | 0.62743600  | -4.58220000 | -1.44020500 |
| H  | 0.81810200  | -5.31131200 | -0.64976900 |
| H  | -0.07625400 | -5.04063100 | -2.14649300 |
| H  | 1.56436500  | -4.39335800 | -1.97092300 |
| C  | -1.28631600 | -3.58058400 | -0.11908200 |
| H  | -2.02948900 | -4.01597400 | -0.79812000 |
| H  | -1.11307800 | -4.30657300 | 0.68216500  |
| H  | -1.73312900 | -2.67761800 | 0.30508100  |
| C  | -0.34697700 | -2.37555900 | -2.12258500 |
| H  | -0.85928700 | -1.46031800 | -1.81313800 |
| H  | 0.54656100  | -2.10859800 | -2.69742700 |
| H  | -1.02123200 | -2.92690200 | -2.79009400 |
| C  | -0.58343700 | 2.34047700  | -1.95569100 |
| H  | 0.19820800  | 1.97040100  | -2.62892900 |
| H  | -1.11213200 | 1.48445500  | -1.52644800 |
| H  | -1.30280500 | 2.90714600  | -2.55988800 |
| C  | -1.11995300 | 3.73525800  | 0.08113300  |
| H  | -1.90727900 | 4.21803500  | -0.50991200 |
| H  | -1.58975800 | 2.90351900  | 0.61396800  |
| H  | -0.76208200 | 4.46853900  | 0.81101900  |
| C  | 0.64238300  | 4.49369800  | -1.56411800 |
| H  | -0.12614200 | 4.98042700  | -2.17784900 |
| H  | 1.01716800  | 5.23732200  | -0.85725500 |
| H  | 1.46325300  | 4.19766500  | -2.22195400 |
| C  | 2.35165200  | 4.52320700  | 1.38963000  |
| H  | 2.88858400  | 4.88599300  | 2.27584300  |
| H  | 3.00601200  | 4.66240100  | 0.52348100  |
| H  | 1.46689900  | 5.15427600  | 1.26549100  |
| C  | 0.99660500  | 2.89647300  | 2.77486900  |
| H  | 1.45798700  | 3.31309400  | 3.67941100  |
| H  | 0.06067400  | 3.43627500  | 2.60593300  |

|   |             |             |             |
|---|-------------|-------------|-------------|
| H | 0.75724700  | 1.84743600  | 2.96954300  |
| C | 3.27504500  | 2.25820800  | 1.94235700  |
| H | 3.07534300  | 1.19372700  | 2.10339000  |
| H | 4.02961000  | 2.34880700  | 1.15587400  |
| H | 3.69930100  | 2.66475000  | 2.86911800  |
| O | -0.44356500 | 0.05061200  | 1.56884800  |
| C | -1.57652600 | 0.33528000  | 2.03773200  |
| O | -2.70554900 | 0.41193800  | 1.47998900  |
| H | -2.23682600 | -0.27926600 | -0.64229500 |

**IMA4-2**

|    | x           | y           | z           |
|----|-------------|-------------|-------------|
| Ni | 0.52219800  | 0.01168400  | -0.15620600 |
| P  | 0.81515800  | 2.29334500  | -0.10449200 |
| P  | 0.91637700  | -2.25468200 | -0.10483400 |
| O  | -1.68512200 | -0.03443000 | 1.54177100  |
| C  | 2.44197500  | 0.05445500  | -0.03476600 |
| O  | 2.48520900  | 2.44449600  | -0.06009500 |
| C  | 0.49242000  | 3.29080100  | -1.70558300 |
| C  | 0.43685800  | 3.26122300  | 1.49462600  |
| O  | 2.59151500  | -2.33127100 | -0.06036400 |
| C  | 0.63843000  | -3.26418700 | -1.70664700 |
| C  | 0.58211500  | -3.24014600 | 1.49344000  |
| C  | -2.20032500 | -0.05058200 | 2.75650500  |
| C  | 3.17213500  | 1.24997000  | -0.01282400 |
| C  | 3.22461700  | -1.10736500 | -0.01290100 |
| C  | 1.59537700  | 4.34142200  | -1.95847300 |
| C  | -0.87661300 | 3.99442500  | -1.69803100 |
| C  | 0.54216500  | 2.25420500  | -2.85119300 |
| C  | -1.06885300 | 3.43707500  | 1.75376600  |
| C  | 1.12576200  | 4.64086200  | 1.48328500  |
| C  | 1.03177600  | 2.40177000  | 2.63598000  |
| C  | 0.64255700  | -2.22543800 | -2.85136400 |
| C  | 1.78688100  | -4.26469600 | -1.96019400 |
| C  | -0.69816700 | -4.02759100 | -1.69956100 |
| C  | 1.13784600  | -2.35555900 | 2.63536300  |
| C  | 1.33281600  | -4.58723800 | 1.48084200  |
| C  | -0.91391100 | -3.48473200 | 1.75311700  |
| O  | -1.51885300 | -0.03529500 | 3.76395700  |
| H  | -3.30161900 | -0.07887400 | 2.80369900  |
| C  | 4.56543500  | 1.31283400  | 0.04676200  |
| C  | 4.61933500  | -1.10816800 | 0.04671400  |
| H  | 1.37959800  | 4.83835000  | -2.91333600 |
| H  | 2.58544800  | 3.88639300  | -2.02640900 |
| H  | 1.62836300  | 5.11199900  | -1.18492000 |
| H  | -1.06231700 | 4.41339400  | -2.69537200 |
| H  | -0.90283200 | 4.82554800  | -0.98669700 |
| H  | -1.70160300 | 3.31735100  | -1.46988800 |
| H  | 1.50743100  | 1.73666200  | -2.88441700 |
| H  | 0.40660000  | 2.77042600  | -3.81051400 |
| H  | -0.24449200 | 1.49978900  | -2.75735300 |
| H  | -1.55780100 | 4.06847800  | 1.00716200  |
| H  | -1.19569700 | 3.92343600  | 2.72939100  |
| H  | -1.58350300 | 2.47729200  | 1.79299500  |
| H  | 2.19263100  | 4.56614400  | 1.25693700  |
| H  | 1.02245800  | 5.08767800  | 2.48045200  |
| H  | 0.66072800  | 5.32967200  | 0.77085800  |
| H  | 0.89838400  | 2.94487900  | 3.58030000  |

|   |             |             |             |
|---|-------------|-------------|-------------|
| H | 2.10319800  | 2.22396200  | 2.50385700  |
| H | 0.51677700  | 1.44203300  | 2.73706800  |
| H | 0.53034000  | -2.74631800 | -3.81118100 |
| H | 1.58396700  | -1.66563100 | -2.88368000 |
| H | -0.17675200 | -1.50666800 | -2.75713700 |
| H | 2.75580300  | -3.76613400 | -2.02771800 |
| H | 1.59341400  | -4.77005700 | -2.91541400 |
| H | 1.85400900  | -5.03354800 | -1.18716300 |
| H | -0.86585100 | -4.45288400 | -2.69740700 |
| H | -1.55208600 | -3.38797300 | -1.46976800 |
| H | -0.68706400 | -4.86002300 | -0.98939100 |
| H | 0.57986400  | -1.42026400 | 2.73759600  |
| H | 2.19998100  | -2.12905500 | 2.50279300  |
| H | 1.02981600  | -2.90498500 | 3.57926700  |
| H | 2.39489500  | -4.46433900 | 1.25308000  |
| H | 0.89847200  | -5.29638800 | 0.76896400  |
| H | 1.25117100  | -5.03837600 | 2.47807200  |
| H | -1.01764600 | -3.97897300 | 2.72751600  |
| H | -1.37442800 | -4.13567400 | 1.00521800  |
| H | -1.47190100 | -2.54959600 | 1.79557600  |
| H | 5.06022300  | 2.27832900  | 0.06586100  |
| C | 5.28345300  | 0.11771800  | 0.07880500  |
| H | 5.15660100  | -2.05068800 | 0.06575900  |
| H | 6.36857100  | 0.14187800  | 0.12583600  |
| C | -3.12180100 | -1.36410200 | -0.28766200 |
| C | -4.44316000 | -1.40646100 | 0.52938300  |
| C | -5.30018900 | -0.11800100 | 0.48895700  |
| C | -4.50130600 | 1.20719400  | 0.52994000  |
| C | -3.18022400 | 1.22462900  | -0.28869500 |
| H | -5.06500600 | -2.25093700 | 0.19353300  |
| H | -2.59780900 | -2.29896800 | -0.05386400 |
| H | -5.92575900 | -0.13169500 | -0.40853100 |
| H | -6.00794600 | -0.13390900 | 1.32958400  |
| H | -5.16049700 | 2.02357800  | 0.19587500  |
| H | -4.25801900 | 1.44650400  | 1.57428100  |
| H | -2.69903300 | 2.18237300  | -0.05551100 |
| H | -4.19082200 | -1.63603300 | 1.57373200  |
| C | -3.41881100 | 1.20854300  | -1.82004800 |
| H | -4.05079100 | 2.06000300  | -2.11835100 |
| H | -2.45116400 | 1.36284600  | -2.31847000 |
| C | -3.35961700 | -1.35934100 | -1.81930000 |
| H | -3.95123300 | -2.23923800 | -2.11786300 |
| C | -4.03008600 | -0.09034700 | -2.37753700 |
| H | -2.38551000 | -1.46869600 | -2.31699100 |
| H | -5.10479000 | -0.11512200 | -2.17446900 |
| H | -3.94175600 | -0.08865100 | -3.47322800 |
| B | -2.27310200 | -0.04972600 | 0.14492100  |
| H | -1.11741800 | -0.02481000 | -0.55954800 |

**IMA5-2**

|   | x          | y           | z           |
|---|------------|-------------|-------------|
| C | 3.33208100 | -1.30150900 | 0.10134800  |
| C | 4.67567100 | -1.31260900 | -0.68208400 |
| C | 5.50541100 | -0.00776500 | -0.60751200 |
| C | 4.67942100 | 1.29943600  | -0.68216300 |
| C | 3.33585500 | 1.29225900  | 0.10136400  |
| H | 5.30519200 | -2.15004100 | -0.34191000 |
| H | 2.83213400 | -2.24717200 | -0.15261200 |

|    |             |             |             |
|----|-------------|-------------|-------------|
| H  | 6.10366900  | -0.00857700 | 0.30930700  |
| H  | 6.23881100  | -0.00884100 | -1.42609700 |
| H  | 5.31136600  | 2.13508900  | -0.34210400 |
| H  | 4.44529200  | 1.50370200  | -1.73447700 |
| H  | 2.83866300  | 2.23937800  | -0.15255400 |
| H  | 4.44101900  | -1.51629000 | -1.73439600 |
| C  | 3.52131900  | 1.27702500  | 1.63776000  |
| H  | 4.11594900  | 2.14580300  | 1.96242800  |
| H  | 2.53397300  | 1.39819600  | 2.10523300  |
| C  | 3.51746200  | -1.28676000 | 1.63776400  |
| H  | 4.10940900  | -2.15732800 | 1.96254600  |
| C  | 4.14775500  | -0.00581300 | 2.21330500  |
| H  | 2.52971200  | -1.40485500 | 2.10518700  |
| H  | 5.22783300  | -0.00744700 | 2.04263200  |
| H  | 4.02654900  | -0.00563600 | 3.30617000  |
| B  | 2.49063600  | -0.00340200 | -0.39110000 |
| C  | -4.59877400 | 1.21611100  | 0.13946300  |
| C  | -3.20422300 | 1.18278800  | 0.08189800  |
| C  | -2.44801900 | 0.00346600  | 0.03293200  |
| C  | -3.20762900 | -1.17365600 | 0.08201100  |
| C  | -4.60226700 | -1.20294000 | 0.13960000  |
| C  | -5.29365000 | 0.00758700  | 0.16223700  |
| H  | -5.11171100 | 2.17198800  | 0.16745900  |
| H  | -5.11796400 | -2.15732700 | 0.16770800  |
| H  | -6.37919500 | 0.00915400  | 0.20561700  |
| O  | -2.55284200 | -2.38887000 | 0.08531300  |
| O  | -2.54592300 | 2.39610300  | 0.08510400  |
| P  | -0.88132000 | -2.28328200 | 0.04934500  |
| P  | -0.87471100 | 2.28568100  | 0.04929400  |
| C  | -0.48962000 | -3.12590400 | 1.72377900  |
| C  | -0.59987500 | -3.45420600 | -1.42789700 |
| C  | -0.48070900 | 3.12710900  | 1.72383600  |
| C  | -0.58983800 | 3.45585300  | -1.42787100 |
| H  | 1.68495600  | -0.00233000 | -3.76560700 |
| Ni | -0.52202600 | 0.00069500  | -0.12602500 |
| C  | -1.37219500 | -2.82843900 | -2.61376800 |
| H  | -1.02981700 | -1.81658400 | -2.84004000 |
| H  | -1.20605200 | -3.45366800 | -3.50094700 |
| H  | -2.44832700 | -2.80134600 | -2.42059400 |
| C  | -1.17115400 | -4.86389000 | -1.17414400 |
| H  | -1.10766700 | -5.43568000 | -2.10917400 |
| H  | -0.60810300 | -5.41790300 | -0.41780000 |
| H  | -2.22301100 | -4.82914600 | -0.87633400 |
| C  | 0.89342800  | -3.55631900 | -1.78883200 |
| H  | 0.99257500  | -4.14454000 | -2.71036700 |
| H  | 1.34420600  | -2.57848300 | -1.96803700 |
| H  | 1.47847200  | -4.06143000 | -1.01557700 |
| C  | -1.59872000 | -4.11503800 | 2.14309600  |
| H  | -1.69030100 | -4.96368700 | 1.46185100  |
| H  | -1.34450500 | -4.51166700 | 3.13485900  |
| H  | -2.57420800 | -3.62853800 | 2.21108800  |
| C  | 0.86455300  | -3.85855800 | 1.70107700  |
| H  | 1.12274200  | -4.15840400 | 2.72482200  |
| H  | 0.82673400  | -4.76940100 | 1.09651700  |
| H  | 1.67797700  | -3.23295100 | 1.33006400  |
| C  | -0.44712800 | -1.98714600 | 2.76654300  |
| H  | 0.34371300  | -1.26395500 | 2.55037900  |
| H  | -1.39837900 | -1.44595100 | 2.81189900  |

|   |             |             |             |
|---|-------------|-------------|-------------|
| H | -0.25669500 | -2.41506200 | 3.75945400  |
| C | -0.44133000 | 1.98812800  | 2.76646700  |
| H | -1.39407300 | 1.44955700  | 2.81177300  |
| H | 0.34750300  | 1.26276500  | 2.55024400  |
| H | -0.24973000 | 2.41541800  | 3.75942300  |
| C | 0.87541000  | 3.85615000  | 1.70126500  |
| H | 1.13432400  | 4.15520700  | 2.72505800  |
| H | 1.68720200  | 3.22844100  | 1.33023800  |
| H | 0.84006200  | 4.76716500  | 1.09679900  |
| C | -1.58716500 | 4.11918000  | 2.14324300  |
| H | -1.33194000 | 4.51493700  | 3.13509700  |
| H | -1.67641500 | 4.96821500  | 1.46215900  |
| H | -2.56397500 | 3.63532400  | 2.21109200  |
| C | -1.15713500 | 4.86712300  | -1.17398400 |
| H | -1.09202900 | 5.43882200  | -2.10896000 |
| H | -2.20908800 | 4.83530900  | -0.87618200 |
| H | -0.59253300 | 5.41945500  | -0.41757600 |
| C | 0.90377400  | 3.55373900  | -1.78867100 |
| H | 1.00469000  | 4.14193000  | -2.71003200 |
| H | 1.49023000  | 4.05692200  | -1.01522700 |
| H | 1.35173000  | 2.57464500  | -1.96811400 |
| C | -1.36385800 | 2.83240500  | -2.61383200 |
| H | -1.02426200 | 1.81964300  | -2.84022700 |
| H | -2.44006200 | 2.80826100  | -2.42067300 |
| H | -1.19596400 | 3.45729700  | -3.50092400 |
| O | 0.20143000  | -0.00032200 | -2.38733200 |
| C | 1.39462700  | -0.00191600 | -2.70163900 |
| O | 2.42026400  | -0.00323000 | -1.91923100 |
| H | 1.23902800  | -0.00161300 | 0.06368000  |

#### IMB1-2

|    | x           | y           | z           |
|----|-------------|-------------|-------------|
| Ni | 0.76783000  | 0.07421100  | -0.05595300 |
| P  | 1.53667000  | -2.12656000 | -0.51171000 |
| P  | 0.99086300  | 2.36069000  | 0.53236100  |
| C  | 2.68868800  | 0.31458000  | -0.10965500 |
| O  | 2.98887400  | -1.74846600 | -1.26731300 |
| C  | 2.18573300  | -3.17970900 | 0.98094200  |
| C  | 0.87259300  | -3.22811600 | -1.90259700 |
| O  | 2.56425800  | 2.35438400  | 1.12509500  |
| C  | 0.17239600  | 3.08011200  | 2.08396200  |
| C  | 1.17926200  | 3.67838800  | -0.86430800 |
| C  | 3.54356700  | -0.59506700 | -0.74619700 |
| C  | 3.33822500  | 1.40298200  | 0.49005600  |
| C  | 3.59369300  | -3.73688500 | 0.67424000  |
| C  | 1.25800500  | -4.36092400 | 1.33617000  |
| C  | 2.29728400  | -2.24594000 | 2.20660800  |
| C  | -0.51841700 | -3.78012600 | -1.53608900 |
| C  | 1.82188500  | -4.39210100 | -2.25451800 |
| C  | 0.78509500  | -2.29869900 | -3.13703000 |
| C  | 0.42662100  | 2.02803400  | 3.18741300  |
| C  | 0.79976000  | 4.41406100  | 2.53560000  |
| C  | -1.34249800 | 3.25657700  | 1.87010300  |
| C  | 1.51009900  | 2.93271500  | -2.17703900 |
| C  | 2.34834800  | 4.63987500  | -0.55696300 |
| C  | -0.11116400 | 4.49689100  | -1.05510700 |
| C  | 4.92837600  | -0.43670900 | -0.83318500 |
| C  | 4.72060200  | 1.60116200  | 0.45554700  |



|   |             |             |             |
|---|-------------|-------------|-------------|
| H | 3.92313200  | -4.32195600 | 1.54298200  |
| H | 4.32398200  | -2.94107800 | 0.51242400  |
| H | 3.60976200  | -4.39682000 | -0.19581100 |
| H | 1.63671000  | -4.83005300 | 2.25335900  |
| H | 1.24953900  | -5.13096600 | 0.56048200  |
| H | 0.22728200  | -4.05691300 | 1.53118700  |
| H | 2.99696900  | -1.42485400 | 2.03127800  |
| H | 2.66467200  | -2.82731900 | 3.06265700  |
| H | 1.33323300  | -1.81465000 | 2.48575100  |
| H | -0.46495500 | -4.54938700 | -0.76147800 |
| H | -0.96661800 | -4.23901200 | -2.42602800 |
| H | -1.19669100 | -2.99589100 | -1.19521500 |
| H | 2.83393000  | -4.03929200 | -2.47126500 |
| H | 1.43899300  | -4.88611400 | -3.15709100 |
| H | 1.87353800  | -5.15045300 | -1.46854600 |
| H | 0.26030700  | -2.82743900 | -3.94239700 |
| H | 1.78279700  | -2.03165400 | -3.49576600 |
| H | 0.23649600  | -1.37741000 | -2.93193400 |
| H | -0.08061900 | 2.34450100  | 4.10744200  |
| H | 1.49359000  | 1.92461800  | 3.40406900  |
| H | 0.03677600  | 1.04356500  | 2.91382200  |
| H | 1.88500800  | 4.33777800  | 2.64654700  |
| H | 0.37898000  | 4.68299700  | 3.51346000  |
| H | 0.57258000  | 5.23462900  | 1.84959900  |
| H | -1.81340900 | 3.48806300  | 2.83369700  |
| H | -1.81228000 | 2.35450300  | 1.47340100  |
| H | -1.57038000 | 4.07961800  | 1.18945500  |
| H | 0.71662000  | 2.24056600  | -2.46564500 |
| H | 2.44445500  | 2.36887600  | -2.10037100 |
| H | 1.63094300  | 3.67446800  | -2.97762200 |
| H | 3.30541500  | 4.11638900  | -0.50009900 |
| H | 2.21126900  | 5.20143500  | 0.36943100  |
| H | 2.41078600  | 5.36479400  | -1.37910600 |
| H | -0.00507600 | 5.10934700  | -1.95952400 |
| H | -0.29103900 | 5.18161900  | -0.22086900 |
| H | -0.99320400 | 3.86895200  | -1.18948000 |
| H | 5.52270500  | -1.18607800 | -1.34576700 |
| C | 5.51157600  | 0.67411400  | -0.22310000 |
| H | 5.14859500  | 2.47470300  | 0.93645600  |
| H | 6.58768600  | 0.81439700  | -0.27125900 |
| O | -1.34601800 | -0.10332800 | 0.06130900  |
| C | -1.57045700 | -1.88355900 | 1.93308700  |
| C | -1.33974800 | -1.64339400 | 3.44681100  |
| C | -2.47298700 | -0.88592200 | 4.16939900  |
| C | -3.04768600 | 0.29029100  | 3.35676000  |
| C | -3.35009900 | -0.00140100 | 1.85479300  |
| H | -1.15496500 | -2.59877200 | 3.96256300  |
| H | -0.64066700 | -2.28304000 | 1.51275700  |
| H | -3.27594300 | -1.58004300 | 4.43229300  |
| H | -2.09339300 | -0.50606800 | 5.12817100  |
| H | -3.96879000 | 0.64349300  | 3.84455800  |
| H | -2.34387200 | 1.12931700  | 3.41467400  |
| H | -3.70587000 | 0.94025200  | 1.42598600  |
| H | -0.41310400 | -1.06292700 | 3.56118100  |
| C | -4.49022000 | -1.04968200 | 1.68583700  |
| H | -5.36301200 | -0.74338900 | 2.28242600  |
| H | -4.82073900 | -1.02694600 | 0.64183400  |
| C | -2.69236800 | -2.92674400 | 1.63133500  |

|   |             |             |             |
|---|-------------|-------------|-------------|
| H | -2.44662300 | -3.88798900 | 2.10982500  |
| C | -4.11538000 | -2.50450600 | 2.05633700  |
| H | -2.69494900 | -3.12307600 | 0.55007800  |
| H | -4.23124200 | -2.65656800 | 3.13325200  |
| H | -4.83838600 | -3.18675300 | 1.58906900  |
| B | -2.02079000 | -0.56513600 | 1.16104000  |
| C | -2.35060400 | -0.59973200 | -2.42879700 |
| C | -3.79951800 | -1.00438100 | -2.08222600 |
| C | -4.80421400 | 0.16265500  | -2.02053900 |
| C | -4.28062400 | 1.42220400  | -1.29049000 |
| C | -2.78364500 | 1.77592100  | -1.50757000 |
| H | -4.17658300 | -1.75345600 | -2.79793100 |
| H | -1.77189800 | -1.52968000 | -2.42379600 |
| H | -5.10718900 | 0.42283700  | -3.03952400 |
| H | -5.72734700 | -0.17670800 | -1.52791300 |
| H | -4.91023900 | 2.27899000  | -1.58155800 |
| H | -4.45711900 | 1.29125400  | -0.21916600 |
| H | -2.56108200 | 2.58453900  | -0.79290200 |
| H | -3.78321200 | -1.51719000 | -1.10927100 |
| C | -2.55922600 | 2.36976600  | -2.92929100 |
| H | -3.20171200 | 3.25277800  | -3.07971700 |
| H | -1.52529900 | 2.73049200  | -3.00324400 |
| C | -2.20039400 | -0.02292400 | -3.86384700 |
| H | -2.63062700 | -0.71536800 | -4.60603700 |
| C | -2.80544000 | 1.38098900  | -4.08862500 |
| H | -1.12569200 | 0.03176900  | -4.08982400 |
| H | -3.88138700 | 1.29551900  | -4.26998800 |
| H | -2.39144500 | 1.80492600  | -5.01503100 |
| B | -1.74689300 | 0.51317900  | -1.40323000 |
| H | -0.61352300 | 0.84375700  | -1.76680900 |

#### IMC1-2

|    | x           | y           | z           |
|----|-------------|-------------|-------------|
| Ni | 0.61416100  | -0.06153200 | 0.24765000  |
| P  | 1.22580700  | 2.15737900  | 0.01678500  |
| P  | 0.65324000  | -2.34695100 | 0.03103600  |
| C  | 2.50368100  | -0.29498200 | 0.02433200  |
| O  | 2.90224500  | 2.07006800  | 0.01487600  |
| C  | 0.93241300  | 2.90224400  | -1.71076100 |
| C  | 1.03916300  | 3.41204400  | 1.43684700  |
| O  | 2.29605700  | -2.68530600 | 0.01852900  |
| C  | 0.16252200  | -3.05925400 | -1.67322900 |
| C  | 0.15281000  | -3.46015800 | 1.48483900  |
| C  | 3.40300600  | 0.78088000  | -0.01830200 |
| C  | 3.10442100  | -1.56284000 | -0.01606800 |
| C  | 1.65587700  | 4.24453800  | -1.92908700 |
| C  | -0.57370700 | 3.05882700  | -1.98004100 |
| C  | 1.50991400  | 1.86985100  | -2.70637900 |
| C  | -0.39264600 | 3.97588500  | 1.49230900  |
| C  | 2.05589600  | 4.57025000  | 1.35477300  |
| C  | 1.34952300  | 2.61146900  | 2.72398300  |
| C  | 0.38826700  | -1.91474400 | -2.68615900 |
| C  | 1.05757500  | -4.25112300 | -2.07292200 |
| C  | -1.31715000 | -3.47591000 | -1.72142900 |
| C  | 0.92992300  | -2.90688000 | 2.70251800  |
| C  | 0.56079800  | -4.93135100 | 1.27220500  |
| C  | -1.35962600 | -3.36802900 | 1.76169000  |
| C  | 4.78901100  | 0.63452200  | -0.09418400 |

|   |             |             |             |
|---|-------------|-------------|-------------|
| C | 4.48280400  | -1.76924100 | -0.09023700 |
| H | 1.61868700  | 4.48880100  | -2.99860200 |
| H | 2.70814600  | 4.20142200  | -1.63248900 |
| H | 1.17019400  | 5.06670100  | -1.39637400 |
| H | -0.71431200 | 3.37125700  | -3.02310000 |
| H | -1.03408400 | 3.82245500  | -1.34687800 |
| H | -1.11426500 | 2.12063200  | -1.83226300 |
| H | 2.58828500  | 1.73425200  | -2.58121000 |
| H | 1.33140700  | 2.23549700  | -3.72550000 |
| H | 1.02448300  | 0.89544200  | -2.61163400 |
| H | -0.58730900 | 4.67344300  | 0.67139000  |
| H | -0.52341200 | 4.53165300  | 2.42963900  |
| H | -1.15733300 | 3.19520700  | 1.45705200  |
| H | 3.07879700  | 4.20457600  | 1.23557700  |
| H | 2.00613900  | 5.13816200  | 2.29292500  |
| H | 1.83720500  | 5.26487400  | 0.54254900  |
| H | 1.27814400  | 3.28622100  | 3.58657100  |
| H | 2.36458400  | 2.20105300  | 2.70433500  |
| H | 0.64969100  | 1.78933800  | 2.88534900  |
| H | 0.17373800  | -2.28855000 | -3.69598400 |
| H | 1.42353000  | -1.55753500 | -2.67635900 |
| H | -0.28040700 | -1.07098500 | -2.48888300 |
| H | 2.11644000  | -3.98240100 | -2.08011900 |
| H | 0.77684900  | -4.56194800 | -3.08753600 |
| H | 0.93004500  | -5.11570900 | -1.41755100 |
| H | -1.57054400 | -3.74270800 | -2.75543500 |
| H | -1.98449800 | -2.66668900 | -1.41753900 |
| H | -1.52088600 | -4.35410000 | -1.10118500 |
| H | 0.68123400  | -1.86120400 | 2.90931300  |
| H | 2.01199200  | -2.97973800 | 2.56123700  |
| H | 0.66170800  | -3.49497300 | 3.58919200  |
| H | 1.61888300  | -5.02957400 | 1.01221900  |
| H | -0.03946700 | -5.41770900 | 0.49785800  |
| H | 0.39175700  | -5.48167200 | 2.20706200  |
| H | -1.57685500 | -3.87605600 | 2.71016000  |
| H | -1.95441300 | -3.85510900 | 0.98548000  |
| H | -1.70280400 | -2.33560600 | 1.84172000  |
| H | 5.42287800  | 1.51475300  | -0.12450400 |
| C | 5.32076600  | -0.65462400 | -0.12733300 |
| H | 4.87558200  | -2.78043200 | -0.11640400 |
| H | 6.39699000  | -0.79171400 | -0.18460200 |
| H | -1.56354800 | 1.35674200  | 2.44391200  |
| H | -2.38170200 | -0.21028300 | 2.54008200  |
| C | -1.47622900 | 0.29312500  | 2.19000500  |
| H | -0.62322900 | -0.11987100 | 2.74310300  |
| O | -1.28984500 | 0.08996900  | 0.79994400  |
| C | -3.34012600 | 1.65268200  | -0.14008400 |
| C | -4.13563300 | 1.75399400  | -1.47180400 |
| C | -5.05851100 | 0.55195600  | -1.78077700 |
| C | -4.45009800 | -0.83400000 | -1.46580300 |
| C | -3.67186400 | -0.91973300 | -0.12333400 |
| H | -4.74344900 | 2.67391000  | -1.49339300 |
| H | -2.67599900 | 2.53138100  | -0.11796800 |
| H | -5.99863200 | 0.66562000  | -1.23119400 |
| H | -5.34315200 | 0.58435100  | -2.84266000 |
| H | -5.25846000 | -1.58361100 | -1.49662300 |
| H | -3.75585200 | -1.09988800 | -2.27571800 |
| H | -3.25179200 | -1.93632700 | -0.07832900 |

|   |             |             |             |
|---|-------------|-------------|-------------|
| H | -3.41003700 | 1.85027500  | -2.29144200 |
| C | -4.61275200 | -0.80397600 | 1.10478500  |
| H | -5.43964200 | -1.52885300 | 1.02046900  |
| H | -4.05914900 | -1.11409200 | 2.00343200  |
| C | -4.26018500 | 1.78023600  | 1.10359900  |
| H | -4.86223200 | 2.70193300  | 1.03873100  |
| C | -5.22161500 | 0.59553500  | 1.35118500  |
| H | -3.63199000 | 1.91223200  | 1.99533400  |
| H | -6.10651900 | 0.71512200  | 0.71817400  |
| H | -5.60056700 | 0.64832900  | 2.38251700  |
| B | -2.51699500 | 0.24040300  | -0.21821900 |
| H | -1.90510300 | 0.14112100  | -1.28193200 |

**IMD1-2**

|    | x           | y           | z           |
|----|-------------|-------------|-------------|
| C  | -4.21873300 | -3.03774800 | -0.72516500 |
| C  | -3.17713000 | -2.27923400 | -0.18803100 |
| C  | -2.56459500 | -1.20603000 | -0.84850100 |
| C  | -3.08732100 | -0.93394500 | -2.12218600 |
| C  | -4.12214800 | -1.66051500 | -2.71378100 |
| C  | -4.68518200 | -2.71815500 | -2.00015700 |
| H  | -4.63734500 | -3.85862800 | -0.15212700 |
| H  | -4.47363500 | -1.38664000 | -3.70318100 |
| H  | -5.49382300 | -3.29568300 | -2.43927100 |
| O  | -2.56494800 | 0.12659700  | -2.83581400 |
| O  | -2.72509800 | -2.62939000 | 1.07094500  |
| P  | -1.56582500 | 1.11392400  | -1.91723000 |
| P  | -1.29388500 | -1.88800800 | 1.52811300  |
| C  | -0.22253900 | 1.40914500  | -3.22245300 |
| C  | -2.73771700 | 2.60658900  | -1.67280900 |
| C  | -0.15373200 | -3.42203900 | 1.44954600  |
| C  | -1.78456800 | -1.42685900 | 3.30858000  |
| H  | 1.73533000  | -0.33448300 | 1.63259800  |
| C  | 1.68030800  | 0.28851700  | 0.72923800  |
| O  | 0.43654900  | 0.89690000  | 0.61251300  |
| O  | 1.90615800  | -0.56814700 | -0.39723800 |
| H  | 2.46109500  | 1.04590300  | 0.76716800  |
| Ni | -1.10914900 | -0.20169500 | -0.08664700 |
| C  | -3.59006000 | 2.28089400  | -0.42464400 |
| H  | -2.97094600 | 2.18061800  | 0.47100600  |
| H  | -4.29890000 | 3.10298100  | -0.25874600 |
| H  | -4.17027700 | 1.36148200  | -0.55520500 |
| C  | -1.95226700 | 3.90512200  | -1.42573900 |
| H  | -1.41064600 | 4.23747000  | -2.31719500 |
| H  | -2.66201100 | 4.69961300  | -1.16125200 |
| H  | -1.24619300 | 3.80591600  | -0.60047400 |
| C  | -3.68907800 | 2.78995300  | -2.87419500 |
| H  | -4.37634100 | 3.61247300  | -2.63743400 |
| H  | -3.16568900 | 3.05400000  | -3.79554700 |
| H  | -4.28522400 | 1.89446400  | -3.06444900 |
| C  | -0.76992600 | 2.06999400  | -4.50180600 |
| H  | -1.06358400 | 3.11032400  | -4.33631300 |
| H  | 0.02347000  | 2.07194700  | -5.26070600 |
| H  | -1.62355400 | 1.52243500  | -4.91204000 |
| C  | 0.92848600  | 2.25244100  | -2.64350400 |
| H  | 1.74140000  | 2.29010500  | -3.38050800 |
| H  | 0.62622700  | 3.28179900  | -2.43519200 |
| H  | 1.32197400  | 1.82359200  | -1.72011000 |

|   |             |             |             |
|---|-------------|-------------|-------------|
| C | 0.30575900  | 0.00039800  | -3.57738800 |
| H | 0.68958500  | -0.52251000 | -2.69739100 |
| H | -0.46869900 | -0.61627500 | -4.04209200 |
| H | 1.13075200  | 0.10606500  | -4.29349800 |
| C | -0.11575100 | -3.82756200 | -0.04279200 |
| H | -1.10412000 | -4.10695400 | -0.41880500 |
| H | 0.28119300  | -3.02520300 | -0.67260700 |
| H | 0.54230100  | -4.69954200 | -0.15222700 |
| C | 1.28571600  | -3.12795000 | 1.91015200  |
| H | 1.87135500  | -4.05261200 | 1.82439200  |
| H | 1.76459500  | -2.38030100 | 1.27659300  |
| H | 1.34497200  | -2.80065300 | 2.95091800  |
| C | -0.72363700 | -4.59575800 | 2.27119000  |
| H | -0.15075400 | -5.50147100 | 2.03280700  |
| H | -0.63044300 | -4.42844200 | 3.34845900  |
| H | -1.77324000 | -4.78973100 | 2.03475900  |
| C | -0.55006900 | -1.33185300 | 4.22428000  |
| H | -0.83955700 | -0.84717600 | 5.16497800  |
| H | -0.15545500 | -2.32175000 | 4.47462300  |
| H | 0.25534300  | -0.73353800 | 3.79038800  |
| C | -2.79756600 | -2.41865600 | 3.91978100  |
| H | -2.38546100 | -3.42104900 | 4.05422600  |
| H | -3.08291100 | -2.04256200 | 4.91083200  |
| H | -3.70199800 | -2.49918600 | 3.31312200  |
| C | -2.47474200 | -0.04880200 | 3.19006700  |
| H | -1.80702300 | 0.72280700  | 2.80081400  |
| H | -3.35439000 | -0.10348100 | 2.53832400  |
| H | -2.81714400 | 0.26521000  | 4.18456800  |
| C | 4.54566400  | -0.48842500 | -0.17707100 |
| C | 5.22315000  | -1.78382700 | 0.36792200  |
| C | 5.32840900  | -2.95344800 | -0.63550400 |
| C | 4.04821100  | -3.20261100 | -1.46297200 |
| C | 3.35738400  | -1.92198300 | -2.02040900 |
| H | 6.22625500  | -1.54463700 | 0.75031100  |
| H | 4.46396100  | 0.20606000  | 0.66949900  |
| H | 6.17283700  | -2.78270000 | -1.30909600 |
| H | 5.57837100  | -3.86988100 | -0.08382300 |
| H | 4.27942300  | -3.89371000 | -2.28721500 |
| H | 3.31711200  | -3.72729400 | -0.83009300 |
| H | 2.40339600  | -2.23173500 | -2.46834600 |
| H | 4.64473400  | -2.12096000 | 1.24134500  |
| C | 4.17610100  | -1.17930800 | -3.11591900 |
| H | 4.40348300  | -1.86424000 | -3.94627000 |
| H | 3.53054500  | -0.39669800 | -3.54059800 |
| C | 5.35392800  | 0.24222500  | -1.29119100 |
| H | 6.35770100  | 0.49412400  | -0.91875600 |
| C | 5.48565200  | -0.52221800 | -2.62679200 |
| H | 4.85744000  | 1.20485900  | -1.48451500 |
| H | 6.26735900  | -1.28214600 | -2.53827600 |
| H | 5.84291200  | 0.17369600  | -3.39779600 |
| B | 3.16214100  | -0.92894900 | -0.80818900 |
| C | 0.95457400  | 3.60183100  | 0.91581200  |
| C | 0.25221100  | 4.80473900  | 1.61117600  |
| C | 0.23538800  | 4.76248900  | 3.15571100  |
| C | -0.08869300 | 3.37566600  | 3.75132000  |
| C | 0.63082900  | 2.18343200  | 3.06135900  |
| H | 0.71078200  | 5.75469000  | 1.29079500  |
| H | 0.80655400  | 3.74877700  | -0.16445500 |

|   |             |            |            |
|---|-------------|------------|------------|
| H | 1.19957700  | 5.10884300 | 3.54253700 |
| H | -0.49958300 | 5.49264700 | 3.52448800 |
| H | 0.13991700  | 3.39466500 | 4.82959400 |
| H | -1.17172900 | 3.20635500 | 3.67042400 |
| H | 0.24847100  | 1.28298400 | 3.56257200 |
| H | -0.78919400 | 4.83792600 | 1.26316100 |
| C | 2.16264100  | 2.19918800 | 3.31287000 |
| H | 2.36809700  | 2.28875300 | 4.39222200 |
| H | 2.57864100  | 1.22171500 | 3.02982700 |
| C | 2.48869400  | 3.62314300 | 1.13891000 |
| H | 2.90100900  | 4.60485900 | 0.85311900 |
| C | 2.95618900  | 3.30899600 | 2.58047000 |
| H | 2.95770300  | 2.91276800 | 0.44137700 |
| H | 2.90766100  | 4.22810600 | 3.17227900 |
| H | 4.02214900  | 3.03822500 | 2.56425900 |
| B | 0.20057800  | 2.26474200 | 1.48531000 |
| H | -1.01193200 | 2.35768400 | 1.36901000 |

**TSA1**

|    | x           | y           | z           |
|----|-------------|-------------|-------------|
| C  | 1.10341100  | 3.73677000  | -0.33295600 |
| C  | 1.10758700  | 2.34579900  | -0.22457200 |
| C  | -0.06391600 | 1.58168400  | -0.13787300 |
| C  | -1.26807300 | 2.29924800  | -0.14884300 |
| C  | -1.32617600 | 3.68892100  | -0.25487300 |
| C  | -0.12656800 | 4.39792900  | -0.34880500 |
| H  | 2.04177500  | 4.27773300  | -0.39859400 |
| H  | -2.28738400 | 4.19247300  | -0.26228000 |
| H  | -0.15064300 | 5.48080900  | -0.43245000 |
| O  | -2.46011500 | 1.59510100  | -0.04948000 |
| O  | 2.33028100  | 1.69178400  | -0.19528200 |
| P  | -2.24141200 | -0.06792200 | 0.04760500  |
| P  | 2.20068700  | 0.02986300  | 0.01569300  |
| C  | -3.11257700 | -0.44386200 | 1.69020100  |
| C  | -3.19410900 | -0.62364500 | -1.49595000 |
| C  | 3.08918300  | -0.18772900 | 1.67820700  |
| C  | 3.17827000  | -0.58749600 | -1.48759100 |
| H  | -0.08144000 | -1.86525800 | 0.83196600  |
| Ni | -0.02055700 | -0.30262200 | 0.02071200  |
| C  | -2.25808100 | -0.29841700 | -2.68426300 |
| H  | -1.32985900 | -0.87057900 | -2.62428100 |
| H  | -2.77184100 | -0.56828800 | -3.61600500 |
| H  | -2.01872200 | 0.76941100  | -2.73413600 |
| C  | -4.51415500 | 0.15206800  | -1.68226200 |
| H  | -4.93151300 | -0.11287400 | -2.66214000 |
| H  | -5.26372800 | -0.10059000 | -0.92915500 |
| H  | -4.35564800 | 1.23376300  | -1.66435600 |
| C  | -3.45818500 | -2.14143600 | -1.46386100 |
| H  | -3.87758300 | -2.44244900 | -2.43253500 |
| H  | -2.53543900 | -2.70778800 | -1.31093800 |
| H  | -4.18890500 | -2.41808000 | -0.69685500 |
| C  | -4.59803700 | -0.03601000 | 1.69533200  |
| H  | -5.21015000 | -0.70374800 | 1.08243100  |
| H  | -4.97886000 | -0.09804200 | 2.72294400  |
| H  | -4.74202200 | 0.99138300  | 1.34727600  |
| C  | -2.97273500 | -1.93827100 | 2.04562600  |
| H  | -3.41791100 | -2.10690700 | 3.03448700  |
| H  | -3.49004800 | -2.59085500 | 1.33742000  |

|   |             |             |             |
|---|-------------|-------------|-------------|
| H | -1.92667700 | -2.25542200 | 2.09671400  |
| C | -2.35959700 | 0.39237200  | 2.75064000  |
| H | -1.29469500 | 0.13948000  | 2.78517200  |
| H | -2.45073400 | 1.46627300  | 2.56379000  |
| H | -2.78866200 | 0.18058800  | 3.73808300  |
| C | 2.21344400  | 0.57084100  | 2.70270800  |
| H | 2.12563000  | 1.63509700  | 2.46348700  |
| H | 1.20541900  | 0.14788700  | 2.76392300  |
| H | 2.67636200  | 0.48346200  | 3.69370300  |
| C | 3.15464200  | -1.67549600 | 2.08075300  |
| H | 3.47010000  | -1.73832300 | 3.13030200  |
| H | 2.19611000  | -2.19374800 | 1.98420300  |
| H | 3.88528800  | -2.23095700 | 1.48747300  |
| C | 4.50120000  | 0.42822800  | 1.67657500  |
| H | 4.88391700  | 0.44150300  | 2.70536200  |
| H | 5.20280000  | -0.15947100 | 1.07785300  |
| H | 4.49800800  | 1.45733900  | 1.30469900  |
| C | 4.41912600  | 0.28439600  | -1.77102200 |
| H | 4.87098400  | -0.05737000 | -2.71095000 |
| H | 4.15697900  | 1.33961700  | -1.88452100 |
| H | 5.18024300  | 0.20076100  | -0.99159200 |
| C | 3.59462800  | -2.06340600 | -1.31822700 |
| H | 3.96005700  | -2.43226500 | -2.28505800 |
| H | 4.41276900  | -2.17474000 | -0.59970100 |
| H | 2.76956100  | -2.71143600 | -1.00858300 |
| C | 2.20126000  | -0.46468600 | -2.68100500 |
| H | 1.34113100  | -1.12822900 | -2.56042500 |
| H | 1.84424700  | 0.56324100  | -2.81059000 |
| H | 2.73210000  | -0.74993700 | -3.59848200 |
| O | -0.12045600 | -2.38667000 | -1.16362400 |
| C | 0.23087800  | -2.69252700 | 0.00219000  |
| O | 0.82240800  | -3.63656700 | 0.50740500  |

**TSA2-2**

|   | x           | y           | z           |
|---|-------------|-------------|-------------|
| C | -4.26180900 | -1.30099700 | 0.38686000  |
| C | -5.17433600 | -0.70654000 | 1.48713800  |
| C | -6.00105300 | 0.52823900  | 1.06448500  |
| C | -5.21804800 | 1.56599600  | 0.22980700  |
| C | -4.31201500 | 0.97422400  | -0.87850200 |
| H | -5.85936000 | -1.47273500 | 1.88535300  |
| H | -3.66997300 | -2.10029600 | 0.86660200  |
| H | -6.88402900 | 0.20121200  | 0.50583800  |
| H | -6.39705400 | 1.01807000  | 1.96624200  |
| H | -5.93339000 | 2.29006600  | -0.19312800 |
| H | -4.57431900 | 2.14055400  | 0.91174400  |
| H | -3.75526500 | 1.81680500  | -1.31956300 |
| H | -4.53164100 | -0.41483600 | 2.33182000  |
| C | -5.08516600 | 0.30455500  | -2.04714600 |
| H | -5.80484600 | 1.00932600  | -2.49399100 |
| H | -4.35486400 | 0.07521800  | -2.83706400 |
| C | -5.02661500 | -1.97000100 | -0.78669300 |
| H | -5.70573600 | -2.75412300 | -0.41429000 |
| C | -5.83131300 | -1.00039100 | -1.68306200 |
| H | -4.28438700 | -2.48503800 | -1.41487900 |
| H | -6.77996700 | -0.75566900 | -1.19404200 |
| H | -6.11159500 | -1.52192200 | -2.60983100 |
| B | -3.33681300 | -0.15921600 | -0.28431400 |

|    |             |             |             |
|----|-------------|-------------|-------------|
| C  | 4.32024100  | 1.36869700  | -1.98334900 |
| C  | 3.15268200  | 1.28626600  | -1.22411400 |
| C  | 2.58573900  | 0.07431900  | -0.80513700 |
| C  | 3.28701400  | -1.08008700 | -1.18414300 |
| C  | 4.45796900  | -1.05581000 | -1.94200200 |
| C  | 4.96446200  | 0.18274000  | -2.33996200 |
| H  | 4.70650200  | 2.33843000  | -2.27967000 |
| H  | 4.95164200  | -1.98519200 | -2.20637700 |
| H  | 5.87429100  | 0.22438300  | -2.93216600 |
| O  | 2.79884200  | -2.31562300 | -0.78220900 |
| O  | 2.52932500  | 2.47054200  | -0.86220500 |
| P  | 1.38529000  | -2.21358300 | 0.11420500  |
| P  | 1.14931800  | 2.25301000  | 0.06672200  |
| C  | 0.23471200  | -3.25167100 | -0.97387300 |
| C  | 1.93137800  | -3.04435200 | 1.73081900  |
| C  | -0.11991000 | 3.17070100  | -1.00701600 |
| C  | 1.63988200  | 3.18650600  | 1.64197400  |
| H  | -1.94920200 | 0.01039300  | 2.82029300  |
| Ni | 1.01624100  | 0.00682200  | 0.26335000  |
| C  | 3.07221600  | -2.15186100 | 2.27317100  |
| H  | 2.73505600  | -1.12562300 | 2.45347800  |
| H  | 3.41878000  | -2.56388300 | 3.22940300  |
| H  | 3.92578100  | -2.11849800 | 1.58974700  |
| C  | 2.47047600  | -4.47326300 | 1.53117800  |
| H  | 2.94101800  | -4.80715400 | 2.46513400  |
| H  | 1.67341500  | -5.18502000 | 1.29884500  |
| H  | 3.22559900  | -4.52015300 | 0.74046200  |
| C  | 0.77479400  | -3.04545000 | 2.75093000  |
| H  | 1.15576900  | -3.41001600 | 3.71362400  |
| H  | 0.36888400  | -2.04180100 | 2.90292900  |
| H  | -0.04392800 | -3.70611600 | 2.45242700  |
| C  | 0.90734200  | -4.54172200 | -1.48546700 |
| H  | 1.07187500  | -5.27521900 | -0.69313700 |
| H  | 0.24373300  | -5.00400200 | -2.22719000 |
| H  | 1.86457600  | -4.33455500 | -1.97175000 |
| C  | -1.07109800 | -3.58479800 | -0.22999600 |
| H  | -1.77614100 | -4.03601500 | -0.93883500 |
| H  | -0.91312000 | -4.30746300 | 0.57697700  |
| H  | -1.55749700 | -2.69438400 | 0.17758600  |
| C  | -0.08198200 | -2.34811700 | -2.18922700 |
| H  | -0.62807900 | -1.44699800 | -1.89673400 |
| H  | 0.82625100  | -2.05670300 | -2.72733900 |
| H  | -0.71875800 | -2.90898400 | -2.88488800 |
| C  | -0.57348300 | 2.13735600  | -2.06462600 |
| H  | 0.27186600  | 1.76128600  | -2.65222200 |
| H  | -1.09603100 | 1.28907300  | -1.61308800 |
| H  | -1.26942400 | 2.62518000  | -2.75866100 |
| C  | -1.33737400 | 3.62893700  | -0.18251100 |
| H  | -2.09682900 | 4.01929900  | -0.87108900 |
| H  | -1.80112700 | 2.80741400  | 0.36967100  |
| H  | -1.08451300 | 4.43679300  | 0.51222300  |
| C  | 0.50957300  | 4.37805100  | -1.73369300 |
| H  | -0.24596500 | 4.80056600  | -2.40828500 |
| H  | 0.81820500  | 5.17139600  | -1.04885200 |
| H  | 1.37473100  | 4.08565300  | -2.33333800 |
| C  | 1.93262000  | 4.67708200  | 1.38710700  |
| H  | 2.35508600  | 5.11783100  | 2.29947100  |
| H  | 2.65962000  | 4.81579600  | 0.58107500  |



|   |             |             |             |
|---|-------------|-------------|-------------|
| H | 1.02761600  | 5.24065800  | 1.14297800  |
| C | 0.54523800  | 3.02996800  | 2.71797500  |
| H | 0.88029100  | 3.53066500  | 3.63540400  |
| H | -0.40438100 | 3.48519600  | 2.42411900  |
| H | 0.36367300  | 1.97856600  | 2.95838200  |
| C | 2.93142500  | 2.50411200  | 2.14882200  |
| H | 2.77770900  | 1.43804100  | 2.34786500  |
| H | 3.75395400  | 2.60460600  | 1.43482400  |
| H | 3.23666400  | 2.98045200  | 3.08904600  |
| O | -0.36723900 | -0.10766900 | 1.61472200  |
| C | -1.59452600 | 0.14046600  | 1.78233600  |
| O | -2.42919100 | 0.55307200  | 0.93919700  |
| H | -2.48909000 | -0.56837400 | -1.05784000 |

**TSA3-2**

|    | x           | y           | z           |
|----|-------------|-------------|-------------|
| Ni | 0.51682500  | 0.04729200  | 0.04555200  |
| P  | 0.64009100  | 2.35236300  | -0.06732700 |
| P  | 1.07570100  | -2.19054700 | -0.06810000 |
| O  | -1.37999500 | -0.13104500 | 1.27770500  |
| C  | 2.42029100  | 0.22992200  | -0.06559400 |
| O  | 2.29298100  | 2.62092400  | -0.07379200 |
| C  | 0.19898400  | 3.19578100  | -1.73240900 |
| C  | 0.21917200  | 3.41394800  | 1.45317000  |
| O  | 2.74943800  | -2.14163300 | -0.08041800 |
| C  | 0.79696500  | -3.10308900 | -1.73124500 |
| C  | 0.86563800  | -3.30986900 | 1.45444000  |
| C  | -1.68951000 | -0.16273500 | 2.56013100  |
| C  | 3.06219100  | 1.47653800  | -0.08610500 |
| C  | 3.28745700  | -0.87188800 | -0.08931500 |
| C  | 1.23077100  | 4.28529200  | -2.09835800 |
| C  | -1.20924000 | 3.81687000  | -1.73182400 |
| C  | 0.26800500  | 2.08346200  | -2.80228500 |
| C  | -1.29124700 | 3.43900800  | 1.74787500  |
| C  | 0.74535400  | 4.85534800  | 1.30142700  |
| C  | 0.95108300  | 2.73271200  | 2.63440100  |
| C  | 0.65781700  | -1.99869000 | -2.80258500 |
| C  | 2.01204000  | -3.98323900 | -2.09767700 |
| C  | -0.47228500 | -3.97352300 | -1.72692600 |
| C  | 1.45931800  | -2.50166200 | 2.63326800  |
| C  | 1.65199400  | -4.62760900 | 1.30371900  |
| C  | -0.61300300 | -3.61641400 | 1.75209800  |
| O  | -0.86897400 | -0.08578900 | 3.45633500  |
| H  | -2.76618700 | -0.26589300 | 2.76614500  |
| C  | 4.44804400  | 1.63963600  | -0.11897600 |
| C  | 4.67902400  | -0.76864300 | -0.12223100 |
| H  | 0.95389700  | 4.69958300  | -3.07654500 |
| H  | 2.24261900  | 3.88190500  | -2.17353400 |
| H  | 1.24699700  | 5.11029700  | -1.38244700 |
| H  | -1.43713400 | 4.16688000  | -2.74685500 |
| H  | -1.27710500 | 4.68369300  | -1.06745800 |
| H  | -1.98534500 | 3.10227200  | -1.45198900 |
| H  | 1.25417700  | 1.60704300  | -2.82873300 |
| H  | 0.08324400  | 2.52536800  | -3.79015100 |
| H  | -0.48124400 | 1.30593300  | -2.62986700 |
| H  | -1.86312000 | 3.96491500  | 0.97885800  |
| H  | -1.45175800 | 3.96681400  | 2.69649600  |
| H  | -1.70243500 | 2.43452400  | 1.85340200  |

|   |             |             |             |
|---|-------------|-------------|-------------|
| H | 1.80923100  | 4.87719100  | 1.04944700  |
| H | 0.61620500  | 5.37497500  | 2.25961800  |
| H | 0.19217800  | 5.42375700  | 0.54743800  |
| H | 0.75383200  | 3.31558000  | 3.54337200  |
| H | 2.03418500  | 2.71071900  | 2.48141800  |
| H | 0.59485200  | 1.71391000  | 2.81281400  |
| H | 0.55813900  | -2.46869200 | -3.78973800 |
| H | 1.53846100  | -1.34759300 | -2.83027100 |
| H | -0.22276800 | -1.37361200 | -2.63098000 |
| H | 2.93154300  | -3.39943500 | -2.17466900 |
| H | 1.81544300  | -4.44283100 | -3.07504900 |
| H | 2.18154300  | -4.79009500 | -1.38101100 |
| H | -0.63527200 | -4.35912500 | -2.74153900 |
| H | -1.36605200 | -3.41484300 | -1.44333800 |
| H | -0.37613200 | -4.83808200 | -1.06323300 |
| H | 0.91813300  | -1.56796000 | 2.81231900  |
| H | 2.51857000  | -2.27650100 | 2.47735800  |
| H | 1.37760300  | -3.11032400 | 3.54306100  |
| H | 2.70092800  | -4.45071500 | 1.05004500  |
| H | 1.21380000  | -5.29081500 | 0.55155400  |
| H | 1.62364200  | -5.16056900 | 2.26287700  |
| H | -0.67108600 | -4.15973100 | 2.70373700  |
| H | -1.07651100 | -4.24440700 | 0.98670500  |
| H | -1.20513300 | -2.70624500 | 1.85284900  |
| H | 4.86924500  | 2.63956600  | -0.12888200 |
| C | 5.25336600  | 0.50168700  | -0.13538300 |
| H | 5.28258300  | -1.67027000 | -0.13463400 |
| H | 6.33443400  | 0.60541700  | -0.15986900 |
| C | -3.09936300 | -1.59602000 | -0.22503000 |
| C | -4.26153100 | -1.70844200 | 0.79680700  |
| C | -5.20394200 | -0.48485000 | 0.87669400  |
| C | -4.49780300 | 0.88826500  | 0.79167700  |
| C | -3.33654300 | 0.98293600  | -0.23248400 |
| H | -4.86833100 | -2.60315100 | 0.58518100  |
| H | -2.47937500 | -2.48936000 | -0.06955900 |
| H | -5.95038500 | -0.55410100 | 0.07954700  |
| H | -5.77951800 | -0.53546700 | 1.81179400  |
| H | -5.25622700 | 1.65835100  | 0.57901900  |
| H | -4.10134600 | 1.14707700  | 1.78437300  |
| H | -2.88871400 | 1.97469800  | -0.08336800 |
| H | -3.82753000 | -1.88913500 | 1.79104000  |
| C | -3.81958700 | 0.93305700  | -1.70670800 |
| H | -4.56481400 | 1.72202600  | -1.89640000 |
| H | -2.96109900 | 1.16699400  | -2.35346700 |
| C | -3.58033900 | -1.64292000 | -1.70010800 |
| H | -4.16684900 | -2.55670400 | -1.88666900 |
| C | -4.40319100 | -0.42147000 | -2.16087000 |
| H | -2.69235800 | -1.71719500 | -2.34505300 |
| H | -5.43339800 | -0.51646800 | -1.80406900 |
| H | -4.47580400 | -0.43100500 | -3.25770900 |
| B | -2.26433500 | -0.21798200 | -0.02685000 |
| H | -1.29593700 | -0.13071900 | -0.84938300 |

**TSA4-2**

|   | x           | y           | z           |
|---|-------------|-------------|-------------|
| C | -3.51250900 | -1.28917200 | -0.13339200 |
| C | -4.84535800 | -1.29015200 | 0.66373700  |
| C | -5.67080800 | 0.01448700  | 0.58208300  |

|    |             |             |             |
|----|-------------|-------------|-------------|
| C  | -4.83613800 | 1.31277900  | 0.67058300  |
| C  | -3.50363100 | 1.30625000  | -0.12695800 |
| H  | -5.48221700 | -2.13097700 | 0.34490500  |
| H  | -3.01339600 | -2.23769500 | 0.12243800  |
| H  | -6.25708700 | 0.01904000  | -0.34255300 |
| H  | -6.41459100 | 0.01497300  | 1.39180600  |
| H  | -5.46703600 | 2.15981200  | 0.35636700  |
| H  | -4.58825600 | 1.49391600  | 1.72472200  |
| H  | -2.99757100 | 2.24997200  | 0.13310100  |
| H  | -4.59903100 | -1.47865800 | 1.71694200  |
| C  | -3.70051000 | 1.30398900  | -1.66279300 |
| H  | -4.31083700 | 2.16563600  | -1.97851700 |
| H  | -2.71732900 | 1.44508600  | -2.13463700 |
| C  | -3.70863400 | -1.27830300 | -1.66922900 |
| H  | -4.32415100 | -2.13456500 | -1.98947000 |
| C  | -4.31915100 | 0.01619800  | -2.24457900 |
| H  | -2.72606800 | -1.42313800 | -2.14134500 |
| H  | -5.40100500 | 0.01913800  | -2.08239200 |
| H  | -4.19041500 | 0.01856100  | -3.33674900 |
| B  | -2.63141300 | 0.00444400  | 0.30721900  |
| C  | 4.66159000  | 1.19679400  | -0.41989800 |
| C  | 3.27723800  | 1.17133200  | -0.24324900 |
| C  | 2.52249200  | -0.00728400 | -0.15559600 |
| C  | 3.27045300  | -1.19045100 | -0.24025200 |
| C  | 4.65462600  | -1.22436800 | -0.41680800 |
| C  | 5.34487100  | -0.01587200 | -0.50705400 |
| H  | 5.17748400  | 2.14964000  | -0.47879900 |
| H  | 5.16500900  | -2.18031800 | -0.47337300 |
| H  | 6.42256300  | -0.01914100 | -0.64384800 |
| O  | 2.61342300  | -2.40123600 | -0.13601500 |
| O  | 2.62733000  | 2.38618200  | -0.14195500 |
| P  | 0.94814300  | -2.27154300 | 0.00286400  |
| P  | 0.96174800  | 2.26689500  | 0.00250400  |
| C  | 0.43433800  | -3.08921500 | -1.65021600 |
| C  | 0.70735800  | -3.42195600 | 1.49403200  |
| C  | 0.44832500  | 3.09018000  | -1.64779100 |
| C  | 0.73258200  | 3.41673700  | 1.49601700  |
| H  | -1.66797000 | -0.00043000 | 3.65675300  |
| Ni | 0.64710100  | -0.00152500 | 0.24696700  |
| C  | 1.48292300  | -2.75509500 | 2.65553200  |
| H  | 1.10155200  | -1.75573600 | 2.87887100  |
| H  | 1.36595300  | -3.37642100 | 3.55303400  |
| H  | 2.55229500  | -2.68290400 | 2.43579200  |
| C  | 1.29686300  | -4.82580100 | 1.25256100  |
| H  | 1.25654100  | -5.38871100 | 2.19425000  |
| H  | 0.73045700  | -5.39591300 | 0.51041000  |
| H  | 2.34295500  | -4.77794700 | 0.93634200  |
| C  | -0.78181400 | -3.53606900 | 1.87485800  |
| H  | -0.85969700 | -4.06541100 | 2.83327100  |
| H  | -1.25763800 | -2.56080300 | 1.99465900  |
| H  | -1.35920500 | -4.10330500 | 1.14101900  |
| C  | 1.50700500  | -4.08430300 | -2.14284500 |
| H  | 1.64948300  | -4.92558000 | -1.46073900 |
| H  | 1.17603900  | -4.49082000 | -3.10743700 |
| H  | 2.47506500  | -3.60104300 | -2.29149800 |
| C  | -0.92196700 | -3.80995000 | -1.54970600 |
| H  | -1.24086700 | -4.10164900 | -2.55846800 |
| H  | -0.85682500 | -4.72501500 | -0.95351900 |

|   |             |             |             |
|---|-------------|-------------|-------------|
| H | -1.70676800 | -3.17701200 | -1.13128100 |
| C | 0.33127100  | -1.94050600 | -2.67704500 |
| H | -0.44966700 | -1.22449700 | -2.40795900 |
| H | 1.27648700  | -1.39556500 | -2.77165000 |
| H | 0.08528000  | -2.36053000 | -3.66102700 |
| C | 0.33580100  | 1.94344300  | -2.67584100 |
| H | 1.27782300  | 1.39359400  | -2.77403600 |
| H | -0.44810300 | 1.23122600  | -2.40536800 |
| H | 0.08911400  | 2.36606400  | -3.65853400 |
| C | -0.90328100 | 3.81902300  | -1.54237000 |
| H | -1.22342000 | 4.11393200  | -2.54980000 |
| H | -1.69072200 | 3.19045900  | -1.12232800 |
| H | -0.83066500 | 4.73289300  | -0.94521800 |
| C | 1.52552000  | 4.07951300  | -2.14218100 |
| H | 1.19415000  | 4.48935300  | -3.10522900 |
| H | 1.67506400  | 4.91897600  | -1.45936200 |
| H | 2.49019300  | 3.59062600  | -2.29434100 |
| C | 1.32931500  | 4.81747700  | 1.25445100  |
| H | 1.29510400  | 5.37947000  | 2.19692700  |
| H | 2.37414900  | 4.76399500  | 0.93497300  |
| H | 0.76395700  | 5.39174100  | 0.51471300  |
| C | -0.75468000 | 3.53855900  | 1.88183600  |
| H | -0.82662100 | 4.06812900  | 2.84059000  |
| H | -1.33173600 | 4.10877000  | 1.15004100  |
| H | -1.23451600 | 2.56546500  | 2.00322400  |
| C | 1.50795600  | 2.74391600  | 2.65419400  |
| H | 1.12072900  | 1.74693900  | 2.87807000  |
| H | 2.57608400  | 2.66505000  | 2.43070700  |
| H | 1.39811700  | 3.36525100  | 3.55259600  |
| O | -0.27579300 | 0.00334800  | 2.19617400  |
| C | -1.46080500 | 0.00106700  | 2.57442400  |
| O | -2.51981600 | -0.00017100 | 1.85941700  |
| H | -1.43696500 | 0.00179400  | -0.15873300 |

**TSA5-2**

|   | x           | y           | z           |
|---|-------------|-------------|-------------|
| C | -3.44476000 | -1.42635900 | 0.12036600  |
| C | -4.93711400 | -1.30921800 | 0.57991900  |
| C | -5.72827800 | -0.12426800 | -0.02172700 |
| C | -4.94595800 | 1.20841200  | -0.08182000 |
| C | -3.45699600 | 1.09494800  | -0.55401200 |
| H | -5.46432400 | -2.24712800 | 0.35061100  |
| H | -3.00681900 | -2.23507100 | 0.70911900  |
| H | -6.07660000 | -0.38982900 | -1.02415000 |
| H | -6.64102600 | 0.02924400  | 0.57030200  |
| H | -5.48608900 | 1.91427000  | -0.73045700 |
| H | -4.93869500 | 1.65860300  | 0.91984100  |
| H | -3.02277500 | 2.09155900  | -0.40976300 |
| H | -4.94349900 | -1.22489000 | 1.67532700  |
| C | -3.29691100 | 0.70435600  | -2.03888800 |
| H | -3.82467100 | 1.42252200  | -2.68505500 |
| H | -2.23106100 | 0.78965000  | -2.29298000 |
| C | -3.27619500 | -1.78304100 | -1.37502200 |
| H | -3.76861700 | -2.74270600 | -1.59510000 |
| C | -3.75678400 | -0.72502600 | -2.38746300 |
| H | -2.20467600 | -1.93878100 | -1.54576600 |
| H | -4.84678300 | -0.75636300 | -2.47565400 |
| H | -3.37770800 | -0.98984900 | -3.38454300 |

|    |             |             |             |
|----|-------------|-------------|-------------|
| B  | -2.84613000 | 0.00895800  | 0.43142100  |
| C  | 4.59235800  | 1.60469700  | 0.31433000  |
| C  | 3.20865200  | 1.45204900  | 0.20600600  |
| C  | 2.56020400  | 0.21452400  | 0.13235600  |
| C  | 3.41042200  | -0.89626800 | 0.16628900  |
| C  | 4.80051200  | -0.81221900 | 0.27256800  |
| C  | 5.38216000  | 0.45428200  | 0.34799200  |
| H  | 5.02742000  | 2.59740900  | 0.36978800  |
| H  | 5.39906700  | -1.71717300 | 0.29585200  |
| H  | 6.46172300  | 0.54582700  | 0.43176900  |
| O  | 2.84488700  | -2.15234900 | 0.09285400  |
| O  | 2.43441600  | 2.59640400  | 0.16929500  |
| P  | 1.16732800  | -2.15837100 | -0.06962400 |
| P  | 0.78498800  | 2.31289500  | -0.01993800 |
| C  | 1.03093000  | -3.00686200 | -1.79068900 |
| C  | 0.82938000  | -3.36223300 | 1.36348300  |
| C  | 0.54363800  | 3.16990300  | -1.71772400 |
| C  | 0.21321300  | 3.38190400  | 1.45048700  |
| H  | -2.46860100 | 0.53371500  | 3.75424200  |
| Ni | 0.62834200  | 0.04971100  | 0.02577200  |
| C  | 1.22337100  | -2.57753600 | 2.63702400  |
| H  | 0.58812100  | -1.69762100 | 2.77622300  |
| H  | 1.08081500  | -3.22827800 | 3.50906700  |
| H  | 2.27085500  | -2.26225200 | 2.61756800  |
| C  | 1.71018000  | -4.62450700 | 1.25624900  |
| H  | 1.57690700  | -5.21892300 | 2.16941700  |
| H  | 1.42497700  | -5.26071400 | 0.41247300  |
| H  | 2.77108300  | -4.37766600 | 1.16479400  |
| C  | -0.65188200 | -3.75969100 | 1.47565200  |
| H  | -0.77031800 | -4.39906300 | 2.36043400  |
| H  | -1.29184600 | -2.89013900 | 1.62653900  |
| H  | -1.00714900 | -4.32967400 | 0.61418300  |
| C  | 2.34447100  | -3.73024700 | -2.15589400 |
| H  | 2.59531400  | -4.52477600 | -1.44881400 |
| H  | 2.22030400  | -4.18797900 | -3.14626700 |
| H  | 3.19147000  | -3.04230500 | -2.20184200 |
| C  | -0.13089900 | -4.01439100 | -1.87859800 |
| H  | -0.23292600 | -4.33965900 | -2.92212500 |
| H  | 0.05399100  | -4.90752100 | -1.27569800 |
| H  | -1.08902400 | -3.58709100 | -1.57607200 |
| C  | 0.79649500  | -1.87320100 | -2.81291600 |
| H  | -0.14252700 | -1.34361400 | -2.62517600 |
| H  | 1.60902400  | -1.13930600 | -2.79437300 |
| H  | 0.75188600  | -2.29972400 | -3.82396600 |
| C  | 0.81046000  | 2.07296700  | -2.77285300 |
| H  | 1.81596300  | 1.65078400  | -2.67300600 |
| H  | 0.08859400  | 1.25423100  | -2.69936800 |
| H  | 0.72820800  | 2.51119800  | -3.77630500 |
| C  | -0.88161800 | 3.71797400  | -1.90556200 |
| H  | -1.00480300 | 4.03000000  | -2.95082600 |
| H  | -1.65116500 | 2.97233300  | -1.69480800 |
| H  | -1.06793400 | 4.59686300  | -1.28125800 |
| C  | 1.55932200  | 4.31001700  | -1.93832800 |
| H  | 1.41035400  | 4.71188100  | -2.94929500 |
| H  | 1.42629400  | 5.13316000  | -1.23288200 |
| H  | 2.59017500  | 3.95904600  | -1.85850000 |
| C  | 0.86621100  | 4.77894700  | 1.43713100  |
| H  | 0.66378500  | 5.26908600  | 2.39861100  |

|   |             |             |             |
|---|-------------|-------------|-------------|
| H | 1.94959500  | 4.72721700  | 1.30467400  |
| H | 0.44512200  | 5.41887100  | 0.65533000  |
| C | -1.31515400 | 3.53389600  | 1.52905400  |
| H | -1.56115200 | 4.07631500  | 2.45203700  |
| H | -1.71951600 | 4.11629400  | 0.69720900  |
| H | -1.82780700 | 2.57207800  | 1.56446300  |
| C | 0.70470900  | 2.60757200  | 2.69632000  |
| H | 0.26912000  | 1.60395700  | 2.74714400  |
| H | 1.79411300  | 2.50833900  | 2.71214400  |
| H | 0.40147700  | 3.15481400  | 3.59823100  |
| O | -2.18617400 | -1.33510800 | 3.01899300  |
| C | -2.42843900 | -0.15678000 | 2.89470900  |
| O | -2.67204800 | 0.51684200  | 1.77043500  |
| H | -0.96815900 | -0.07963400 | -0.02188200 |

**TSA6-2**

|   | x           | y           | z           |
|---|-------------|-------------|-------------|
| C | 0.10431200  | -0.07468000 | 1.13041600  |
| C | -0.50985600 | 1.34712300  | 1.32032200  |
| C | -1.59601200 | 1.74093700  | 0.29414800  |
| C | -1.25473300 | 1.38493100  | -1.17027800 |
| C | -0.64560900 | -0.03399800 | -1.38524700 |
| H | -0.91970300 | 1.44061100  | 2.33636300  |
| H | 0.93209900  | -0.16954900 | 1.84793500  |
| H | -2.54840500 | 1.28087300  | 0.57277100  |
| H | -1.76594000 | 2.82356300  | 0.36297600  |
| H | -2.15481300 | 1.50337600  | -1.79089000 |
| H | -0.52899700 | 2.11828000  | -1.55067900 |
| H | -0.32438000 | -0.10690400 | -2.43244600 |
| H | 0.31281400  | 2.07417100  | 1.25985600  |
| C | -1.62529000 | -1.21114700 | -1.10011000 |
| H | -2.52654600 | -1.10770000 | -1.72166200 |
| H | -1.13736100 | -2.13900900 | -1.43380100 |
| C | -0.88554300 | -1.24988300 | 1.39179500  |
| H | -1.29986700 | -1.16871200 | 2.40709000  |
| C | -2.04444700 | -1.37723100 | 0.37771400  |
| H | -0.30537500 | -2.18493500 | 1.38049100  |
| H | -2.82563600 | -0.65193300 | 0.62185600  |
| H | -2.51382900 | -2.36202200 | 0.50323800  |
| B | 0.54756600  | -0.16703200 | -0.37640400 |
| H | 3.06268400  | -1.49609700 | 0.33089100  |
| O | 3.75922800  | 0.40267500  | 0.12313500  |
| C | 2.95688100  | -0.46803300 | -0.05354200 |
| O | 1.84167500  | -0.32354600 | -0.82854500 |

**TSB1-2**

|   | x           | y           | z           |
|---|-------------|-------------|-------------|
| C | -5.21487500 | -0.17372200 | -0.39716600 |
| C | -3.86099800 | -0.47602600 | -0.25003500 |
| C | -2.85511900 | 0.49891600  | -0.21002800 |
| C | -3.29152400 | 1.82825700  | -0.28284100 |
| C | -4.63259300 | 2.18518800  | -0.43072300 |
| C | -5.58770600 | 1.16865900  | -0.49224200 |
| H | -5.94836600 | -0.97280800 | -0.42948700 |
| H | -4.91081500 | 3.23255100  | -0.48743900 |
| H | -6.63690000 | 1.42599100  | -0.60763600 |
| O | -2.35136400 | 2.84054500  | -0.19028000 |
| O | -3.49755300 | -1.80991700 | -0.12724000 |

|    |             |             |             |
|----|-------------|-------------|-------------|
| P  | -0.77966800 | 2.29313500  | 0.05757500  |
| P  | -1.84508600 | -2.03653100 | 0.06080100  |
| C  | 0.07576400  | 3.11204000  | -1.42840300 |
| C  | -0.39351800 | 3.09767400  | 1.72952300  |
| C  | -1.50906500 | -3.11991000 | -1.46242700 |
| C  | -1.80010800 | -2.96109600 | 1.71604600  |
| H  | 1.51306300  | -1.67538500 | 0.29082300  |
| C  | 1.33862700  | -0.66635500 | -0.13511300 |
| O  | 1.04887500  | -0.56081500 | -1.36947300 |
| O  | 2.43626400  | 0.18150800  | 0.36293200  |
| H  | 0.47485400  | -0.24859900 | 0.68858200  |
| Ni | -1.03093000 | 0.05918100  | 0.07364600  |
| C  | 4.92705900  | 0.69905500  | 0.65270400  |
| C  | 5.72391100  | -0.09629900 | 1.72619000  |
| C  | 6.15876400  | -1.51733300 | 1.30377700  |
| C  | 5.06090100  | -2.33497400 | 0.58570900  |
| C  | 4.24018900  | -1.56036800 | -0.48568200 |
| H  | 6.61233700  | 0.47245600  | 2.04081000  |
| H  | 4.57759600  | 1.63063400  | 1.11971300  |
| H  | 7.04458400  | -1.45333200 | 0.66503800  |
| H  | 6.48438800  | -2.06920700 | 2.19643300  |
| H  | 5.51675500  | -3.23129200 | 0.13795900  |
| H  | 4.35321600  | -2.70676600 | 1.34277500  |
| H  | 3.43689400  | -2.22278300 | -0.83166400 |
| H  | 5.08794300  | -0.17604300 | 2.62098800  |
| C  | 5.05065100  | -1.14517100 | -1.74975500 |
| H  | 5.48972500  | -2.03706800 | -2.22218200 |
| H  | 4.33246900  | -0.74018200 | -2.47683300 |
| C  | 5.74782200  | 1.08333600  | -0.61245800 |
| H  | 6.64566400  | 1.65227100  | -0.32611700 |
| C  | 6.16422900  | -0.10144200 | -1.51317700 |
| H  | 5.13256500  | 1.77397500  | -1.20828400 |
| H  | 7.04463500  | -0.59344400 | -1.08876900 |
| H  | 6.49229700  | 0.29158800  | -2.48534300 |
| B  | 3.72685800  | -0.21716400 | 0.17945000  |
| C  | -0.26249700 | 2.20314000  | -2.63385800 |
| H  | 0.16485000  | 1.20553400  | -2.50259400 |
| H  | -1.34445800 | 2.11574800  | -2.78618100 |
| H  | 0.16406300  | 2.65455500  | -3.53933700 |
| C  | 1.60402500  | 3.15285000  | -1.24245000 |
| H  | 2.01400100  | 2.17230800  | -0.98838000 |
| H  | 2.05910300  | 3.47379300  | -2.18852500 |
| H  | 1.90693900  | 3.87446100  | -0.47625200 |
| C  | -0.46787000 | 4.52932800  | -1.70244500 |
| H  | -0.19324300 | 5.24782700  | -0.92635900 |
| H  | -0.03238700 | 4.88374000  | -2.64568500 |
| H  | -1.55549300 | 4.53422300  | -1.80955500 |
| C  | -0.09860700 | -3.73696500 | -1.41388500 |
| H  | 0.06311300  | -4.30396400 | -2.33985800 |
| H  | 0.66800800  | -2.95915800 | -1.36794600 |
| H  | 0.02721600  | -4.43844900 | -0.58182600 |
| C  | -1.58556800 | -2.14664100 | -2.66344400 |
| H  | -2.56973300 | -1.67241700 | -2.74184400 |
| H  | -0.81407100 | -1.37648600 | -2.59076600 |
| H  | -1.41856700 | -2.72053400 | -3.58443800 |
| C  | -2.57458200 | -4.22026800 | -1.64705700 |
| H  | -2.43153300 | -4.66990700 | -2.63793900 |
| H  | -2.48864300 | -5.02209800 | -0.91050000 |

|   |             |             |             |
|---|-------------|-------------|-------------|
| H | -3.58939200 | -3.81547000 | -1.60508500 |
| C | -0.33627700 | -3.12958400 | 2.17218300  |
| H | -0.32469300 | -3.60053000 | 3.16345900  |
| H | 0.24431500  | -3.76774700 | 1.49954300  |
| H | 0.17448600  | -2.16511700 | 2.25666800  |
| C | -2.50445600 | -4.33012100 | 1.69321700  |
| H | -1.94210700 | -5.07126200 | 1.11818900  |
| H | -2.58181900 | -4.70611300 | 2.72178800  |
| H | -3.51771200 | -4.26494000 | 1.28510500  |
| C | -2.52905200 | -2.04039500 | 2.72176400  |
| H | -2.07233600 | -1.04589900 | 2.76810300  |
| H | -3.58624900 | -1.91967400 | 2.46911100  |
| H | -2.46509900 | -2.48772500 | 3.72179900  |
| C | -1.42686600 | 2.50554300  | 2.71561800  |
| H | -1.34976200 | 1.41452400  | 2.77497000  |
| H | -1.23329500 | 2.91245200  | 3.71622100  |
| H | -2.45340700 | 2.76251100  | 2.43785600  |
| C | 1.02196800  | 2.70669700  | 2.19906500  |
| H | 1.80466000  | 3.15982700  | 1.58597100  |
| H | 1.15971000  | 3.06092100  | 3.22908000  |
| H | 1.18212000  | 1.62507700  | 2.18582000  |
| C | -0.54350300 | 4.63031500  | 1.70963000  |
| H | -0.48254300 | 5.00694000  | 2.73900000  |
| H | 0.25662000  | 5.11191500  | 1.14033300  |
| H | -1.50703700 | 4.94173600  | 1.29477500  |

#### TSB2-2

|    | x           | y           | z           |
|----|-------------|-------------|-------------|
| Ni | 0.61429500  | -0.00101500 | 0.10245800  |
| P  | 0.98000600  | -2.26723600 | 0.05023000  |
| P  | 0.99092500  | 2.26304300  | 0.04874400  |
| C  | 2.29453600  | -0.00521600 | -0.82337000 |
| O  | 2.38197500  | -2.40378200 | -0.86034900 |
| C  | 1.56306200  | -3.10780900 | 1.65686300  |
| C  | -0.14622400 | -3.36491800 | -1.01308200 |
| O  | 2.38631900  | 2.39296800  | -0.87290400 |
| C  | 1.59098600  | 3.09879500  | 1.65189300  |
| C  | -0.13722100 | 3.36698200  | -1.00571600 |
| C  | 2.94748300  | -1.18795700 | -1.20411800 |
| C  | 2.94944900  | 1.17432300  | -1.21074500 |
| C  | 2.13339100  | -4.51801400 | 1.41126600  |
| C  | 0.43544400  | -3.16473200 | 2.70511600  |
| C  | 2.68997700  | -2.19805900 | 2.19853000  |
| C  | -1.42580500 | -3.73997100 | -0.24316000 |
| C  | 0.54754400  | -4.64074500 | -1.53311100 |
| C  | -0.49644900 | -2.48568500 | -2.23528000 |
| C  | 2.71229200  | 2.17835700  | 2.18726300  |
| C  | 2.17372700  | 4.50332500  | 1.40252600  |
| C  | 0.47046600  | 3.16700800  | 2.70706500  |
| C  | -0.49408900 | 2.49266000  | -2.22945400 |
| C  | 0.55689600  | 4.64328800  | -1.52399800 |
| C  | -1.41256400 | 3.74262700  | -0.22918700 |
| C  | 4.14692000  | -1.22051100 | -1.91735200 |
| C  | 4.14885200  | 1.20095000  | -1.92426300 |
| H  | 2.65337200  | -4.84441000 | 2.32134000  |
| H  | 2.85470400  | -4.53764300 | 0.58890100  |
| H  | 1.34803200  | -5.25243400 | 1.21030900  |
| H  | 0.83467300  | -3.62520600 | 3.61872700  |



|   |             |             |             |
|---|-------------|-------------|-------------|
| H | -0.41449200 | -3.77291900 | 2.38196300  |
| H | 0.09856100  | -2.15632300 | 2.95195600  |
| H | 3.53121300  | -2.12707500 | 1.50227200  |
| H | 3.06531000  | -2.63018100 | 3.13545400  |
| H | 2.31485100  | -1.19547400 | 2.41516900  |
| H | -1.22838400 | -4.48388500 | 0.53462900  |
| H | -2.15000200 | -4.18218500 | -0.93899400 |
| H | -1.90073000 | -2.87170800 | 0.22358800  |
| H | 1.50135500  | -4.41295100 | -2.01583700 |
| H | -0.10689000 | -5.10977400 | -2.27957200 |
| H | 0.72452500  | -5.37672800 | -0.74667900 |
| H | -1.16321900 | -3.04589300 | -2.90329600 |
| H | 0.40084300  | -2.21942600 | -2.80405100 |
| H | -1.00230700 | -1.56273200 | -1.94456200 |
| H | 3.09912100  | 2.60858100  | 3.12037800  |
| H | 3.54771300  | 2.09688100  | 1.48514500  |
| H | 2.32828400  | 1.18020400  | 2.40869200  |
| H | 2.88750900  | 4.51665600  | 0.57354000  |
| H | 2.70549200  | 4.82322600  | 2.30806700  |
| H | 1.39424600  | 5.24607800  | 1.20970400  |
| H | 0.88162400  | 3.61778500  | 3.62021600  |
| H | 0.12068800  | 2.16251700  | 2.95208700  |
| H | -0.37245700 | 3.78871900  | 2.39139700  |
| H | -1.00048900 | 1.56971300  | -1.93983300 |
| H | 0.40041800  | 2.22690100  | -2.80278400 |
| H | -1.16255200 | 3.05635700  | -2.89282600 |
| H | 1.50742600  | 4.41524100  | -2.01305600 |
| H | 0.74002200  | 5.37535400  | -0.73530600 |
| H | -0.10051400 | 5.11730500  | -2.26467300 |
| H | -2.13635200 | 4.19409300  | -0.91950100 |
| H | -1.20885100 | 4.47996900  | 0.55323700  |
| H | -1.89127800 | 2.87433900  | 0.23364600  |
| H | 4.59204000  | -2.17563900 | -2.17664000 |
| C | 4.74202100  | -0.01127500 | -2.27627800 |
| H | 4.59564600  | 2.15388300  | -2.18868600 |
| H | 5.67566400  | -0.01361500 | -2.83186900 |
| H | -1.72694900 | 0.92822000  | 2.61047100  |
| O | -1.48504900 | 0.00504700  | 0.60581700  |
| C | -1.15931200 | 0.00730900  | 2.38344800  |
| H | -1.73412700 | -0.90802300 | 2.61460100  |
| O | 0.09785100  | 0.00258600  | 2.50031800  |
| C | -4.04281800 | 0.00888600  | 1.14880200  |
| C | -4.84562200 | 1.31622800  | 0.88994500  |
| C | -5.23036500 | 1.57971100  | -0.58139000 |
| C | -4.09717100 | 1.30469500  | -1.59438200 |
| C | -3.27354100 | 0.00752300  | -1.34573900 |
| H | -5.75786000 | 1.32757900  | 1.50614300  |
| H | -3.78115000 | 0.00890200  | 2.21376800  |
| H | -6.11001900 | 0.98377900  | -0.84194200 |
| H | -5.55073200 | 2.62591000  | -0.68365100 |
| H | -4.52225300 | 1.28486100  | -2.60976500 |
| H | -3.40450600 | 2.15552600  | -1.57939500 |
| H | -2.45224300 | 0.00664600  | -2.07595400 |
| H | -4.23547200 | 2.15897700  | 1.24968100  |
| C | -4.10091600 | -1.28720600 | -1.59454500 |
| H | -4.52673400 | -1.26571400 | -2.60958800 |
| H | -3.41055600 | -2.13989400 | -1.58056700 |
| C | -4.84790700 | -1.29720500 | 0.89038600  |

|   |             |             |             |
|---|-------------|-------------|-------------|
| H | -5.75977000 | -1.30715400 | 1.50715800  |
| C | -5.23411200 | -1.55957900 | -0.58077500 |
| H | -4.23889500 | -2.14103700 | 1.24955300  |
| H | -6.11243900 | -0.96136200 | -0.84056900 |
| H | -5.55720500 | -2.60494100 | -0.68302500 |
| B | -2.77009500 | 0.00683400  | 0.17428100  |

**TSB3-2**

|    | x           | y           | z           |
|----|-------------|-------------|-------------|
| Ni | -0.85039400 | 0.03625100  | 0.14098600  |
| P  | -1.34806000 | -2.24774400 | 0.48135600  |
| P  | -1.27046500 | 2.22489500  | -0.57584900 |
| C  | -2.76947400 | 0.00643700  | -0.03621500 |
| O  | -2.90127900 | -2.08290700 | 1.10509500  |
| C  | -1.70289400 | -3.30183800 | -1.10843900 |
| C  | -0.67833900 | -3.32712600 | 1.88591400  |
| O  | -2.78551200 | 2.04018400  | -1.28142300 |
| C  | -0.39895600 | 2.95202500  | -2.09332000 |
| C  | -1.69727800 | 3.55724700  | 0.74696900  |
| C  | -3.55204800 | -1.00549300 | 0.53591500  |
| C  | -3.49239100 | 1.00760500  | -0.69933000 |
| C  | -3.08302500 | -3.98622200 | -0.99532100 |
| C  | -0.63904800 | -4.39023400 | -1.36339500 |
| C  | -1.73092700 | -2.34544000 | -2.32067700 |
| C  | 0.78260200  | -3.73811300 | 1.60844600  |
| C  | -1.54137600 | -4.58180900 | 2.13491700  |
| C  | -0.76282300 | -2.43474400 | 3.14569200  |
| C  | -0.44773700 | 1.82873100  | -3.15406000 |
| C  | -1.12483200 | 4.19080400  | -2.65507400 |
| C  | 1.06793800  | 3.29498700  | -1.77784400 |
| C  | -2.04419800 | 2.80709700  | 2.05329100  |
| C  | -2.93579900 | 4.37704400  | 0.32311900  |
| C  | -0.52289900 | 4.52108200  | 1.00084100  |
| C  | -4.94823600 | -1.01695200 | 0.50655300  |
| C  | -4.88648500 | 1.03469400  | -0.77800100 |
| H  | -3.24140300 | -4.58212200 | -1.90378500 |
| H  | -3.89830600 | -3.26263900 | -0.92616700 |
| H  | -3.15232500 | -4.66053400 | -0.13851100 |
| H  | -0.84789100 | -4.84997100 | -2.33783500 |
| H  | -0.67235500 | -5.18782100 | -0.61717400 |
| H  | 0.37876000  | -3.99704800 | -1.40402500 |
| H  | -2.51756100 | -1.59268600 | -2.22861300 |
| H  | -1.92460900 | -2.93047500 | -3.22948800 |
| H  | -0.77881700 | -1.82625000 | -2.45492400 |
| H  | 0.84883900  | -4.54213300 | 0.87197500  |
| H  | 1.23235900  | -4.10610000 | 2.53870000  |
| H  | 1.39227800  | -2.90199200 | 1.25866100  |
| H  | -2.59075400 | -4.32492500 | 2.30361500  |
| H  | -1.16828300 | -5.08149200 | 3.03844500  |
| H  | -1.48433000 | -5.30624200 | 1.31819000  |
| H  | -0.28434100 | -2.95706600 | 3.98353300  |
| H  | -1.80329300 | -2.23512100 | 3.41719500  |
| H  | -0.25239900 | -1.48007000 | 3.01235000  |
| H  | 0.08129600  | 2.16600200  | -4.05412300 |
| H  | -1.47575200 | 1.58316200  | -3.43523200 |
| H  | 0.04081400  | 0.91527300  | -2.80233700 |
| H  | -2.18326400 | 3.99297100  | -2.84608000 |
| H  | -0.65559000 | 4.46631100  | -3.60859500 |

|   |             |             |             |
|---|-------------|-------------|-------------|
| H | -1.04254700 | 5.05659300  | -1.99195600 |
| H | 1.57573600  | 3.56656700  | -2.71173200 |
| H | 1.60020000  | 2.44949900  | -1.33788900 |
| H | 1.15987900  | 4.14417500  | -1.09699400 |
| H | -1.21447400 | 2.19191300  | 2.40775600  |
| H | -2.91743100 | 2.15967700  | 1.92846100  |
| H | -2.28225000 | 3.54550500  | 2.83014900  |
| H | -3.82504200 | 3.75210900  | 0.21490800  |
| H | -2.78743300 | 4.92338200  | -0.61096900 |
| H | -3.13661100 | 5.11416500  | 1.11148400  |
| H | -0.76864400 | 5.14890300  | 1.86671000  |
| H | -0.35327400 | 5.19177100  | 0.15300500  |
| H | 0.40988400  | 4.00361900  | 1.22865900  |
| H | -5.48678100 | -1.83589600 | 0.97217100  |
| C | -5.61039600 | 0.01631400  | -0.15712000 |
| H | -5.37805100 | 1.84943700  | -1.29959500 |
| H | -6.69583700 | 0.02363900  | -0.19777600 |
| O | 1.52672400  | -0.03207200 | -0.02667800 |
| C | 2.13419900  | -1.73092600 | -1.86369300 |
| C | 1.97707000  | -1.52745900 | -3.39159700 |
| C | 3.03772600  | -0.61530400 | -4.04154800 |
| C | 3.36685000  | 0.64003600  | -3.21067500 |
| C | 3.59707000  | 0.40615500  | -1.68769600 |
| H | 1.96649100  | -2.49881700 | -3.91095100 |
| H | 1.24505100  | -2.26038100 | -1.50193200 |
| H | 3.95325900  | -1.18379000 | -4.22786900 |
| H | 2.68271800  | -0.30456300 | -5.03418500 |
| H | 4.25419400  | 1.12898400  | -3.64105800 |
| H | 2.54629400  | 1.36010100  | -3.32954000 |
| H | 3.77625800  | 1.39357800  | -1.24966400 |
| H | 0.98722400  | -1.08433400 | -3.57526600 |
| C | 4.86038700  | -0.46135700 | -1.40217900 |
| H | 5.73114500  | -0.03092400 | -1.92033200 |
| H | 5.08451500  | -0.38730600 | -0.33142500 |
| C | 3.37078600  | -2.59569600 | -1.46811100 |
| H | 3.31511600  | -3.58061000 | -1.95830000 |
| C | 4.74267800  | -1.95773500 | -1.78064700 |
| H | 3.31381000  | -2.79499600 | -0.38789400 |
| H | 4.96833600  | -2.09012200 | -2.84283300 |
| H | 5.52226900  | -2.51936200 | -1.24806000 |
| B | 2.32791800  | -0.35792200 | -1.07508000 |
| C | 2.21473700  | -0.37957600 | 2.53985300  |
| C | 3.73810800  | -0.53310300 | 2.32958600  |
| C | 4.53387900  | 0.78692300  | 2.34582700  |
| C | 3.86981400  | 1.94379000  | 1.56202700  |
| C | 2.32084800  | 2.03929200  | 1.64746300  |
| H | 4.16851000  | -1.21301300 | 3.08299600  |
| H | 1.80438400  | -1.39440500 | 2.48843200  |
| H | 4.70179600  | 1.08877000  | 3.38429800  |
| H | 5.53897700  | 0.61036200  | 1.93542700  |
| H | 4.31965200  | 2.89366200  | 1.89466700  |
| H | 4.15140700  | 1.84618300  | 0.50993700  |
| H | 2.03265200  | 2.80460300  | 0.91017000  |
| H | 3.89501300  | -1.03377200 | 1.36299200  |
| C | 1.87346800  | 2.57200600  | 3.03690500  |
| H | 2.32986900  | 3.55580400  | 3.23480500  |
| H | 0.78911800  | 2.74082600  | 3.02048800  |
| C | 1.83852400  | 0.15689900  | 3.94728000  |

|   |            |             |            |
|---|------------|-------------|------------|
| H | 2.29480400 | -0.46709900 | 4.73316900 |
| C | 2.18849400 | 1.63497200  | 4.21938200 |
| H | 0.75136700 | 0.04611900  | 4.07035800 |
| H | 3.24523600 | 1.72645800  | 4.48796400 |
| H | 1.63547300 | 1.97673200  | 5.10642300 |
| B | 1.56644500 | 0.60445400  | 1.40996800 |
| H | 0.31620400 | 0.71057000  | 1.62417900 |

**TSC1**

|    | x           | y           | z           |
|----|-------------|-------------|-------------|
| Ni | -0.00000400 | -0.38367100 | 0.16923600  |
| P  | -2.21625900 | -0.10378100 | 0.10621600  |
| P  | 2.21625700  | -0.10378800 | 0.10622600  |
| C  | 0.00000600  | 1.43299200  | -0.39982000 |
| O  | -2.39268600 | 1.51488300  | -0.32049500 |
| C  | -3.17993900 | -0.90971000 | -1.32018000 |
| C  | -3.12077600 | -0.09875600 | 1.77502500  |
| O  | 2.39269900  | 1.51487100  | -0.32049700 |
| C  | 3.17995700  | -0.90969400 | -1.32017100 |
| C  | 3.12072400  | -0.09876200 | 1.77506200  |
| C  | -1.18599800 | 2.16211900  | -0.55069800 |
| C  | 1.18601400  | 2.16211400  | -0.55069500 |
| C  | -4.60104100 | -0.33465100 | -1.47543900 |
| C  | -3.23327900 | -2.44334600 | -1.17284700 |
| C  | -2.35972300 | -0.57374200 | -2.58945500 |
| C  | -3.28003500 | -1.53866200 | 2.30083800  |
| C  | -4.48695700 | 0.61372100  | 1.74328300  |
| C  | -2.18584500 | 0.68123500  | 2.72878800  |
| C  | 2.35956300  | -0.57400600 | -2.58940600 |
| C  | 4.60093500  | -0.33437600 | -1.47563000 |
| C  | 3.23360000  | -2.44330000 | -1.17266700 |
| C  | 2.18609200  | 0.68186200  | 2.72860000  |
| C  | 4.48722900  | 0.61308600  | 1.74322800  |
| C  | 3.27932100  | -1.53862300 | 2.30120600  |
| C  | -1.21578100 | 3.51309600  | -0.89919200 |
| C  | 1.21580200  | 3.51309200  | -0.89918600 |
| H  | -5.00254600 | -0.66171700 | -2.44325000 |
| H  | -4.60962000 | 0.75930100  | -1.46266400 |
| H  | -5.28335400 | -0.70181800 | -0.70375100 |
| H  | -3.78276900 | -2.85112200 | -2.03179300 |
| H  | -3.76339200 | -2.76524900 | -0.27108800 |
| H  | -2.22573200 | -2.86839900 | -1.19060100 |
| H  | -2.29761700 | 0.50467000  | -2.76551100 |
| H  | -2.86298400 | -1.02642900 | -3.45361500 |
| H  | -1.35160600 | -0.99129500 | -2.52824200 |
| H  | -4.01650400 | -2.10959200 | 1.72762000  |
| H  | -3.62978200 | -1.50368800 | 3.34067900  |
| H  | -2.33171200 | -2.08768200 | 2.28819800  |
| H  | -4.41671500 | 1.60508600  | 1.28649700  |
| H  | -4.84214100 | 0.74244800  | 2.77414500  |
| H  | -5.24513800 | 0.03782500  | 1.20814500  |
| H  | -2.64520200 | 0.72070600  | 3.72496100  |
| H  | -2.02596900 | 1.70993500  | 2.39054500  |
| H  | -1.20902900 | 0.19640500  | 2.82256600  |
| H  | 2.86285800  | -1.02664600 | -3.45357100 |
| H  | 2.29721700  | 0.50438100  | -2.76554000 |
| H  | 1.35154400  | -0.99177700 | -2.52807100 |
| H  | 4.60929300  | 0.75957800  | -1.46295000 |

|   |             |             |             |
|---|-------------|-------------|-------------|
| H | 5.00239500  | -0.66144700 | -2.44345700 |
| H | 5.28340500  | -0.70133200 | -0.70398400 |
| H | 3.78305300  | -2.85108200 | -2.03163300 |
| H | 2.22613200  | -2.86854300 | -1.19024500 |
| H | 3.76388900  | -2.76499700 | -0.27093600 |
| H | 1.20899600  | 0.19758500  | 2.82232500  |
| H | 2.02683000  | 1.71059900  | 2.39018800  |
| H | 2.64534500  | 0.72121300  | 3.72482500  |
| H | 4.41751100  | 1.60431100  | 1.28605400  |
| H | 5.24521800  | 0.03662600  | 1.20842100  |
| H | 4.84233900  | 0.74205000  | 2.77408600  |
| H | 3.62911000  | -1.50357000 | 3.34103100  |
| H | 4.01551000  | -2.11003100 | 1.72810600  |
| H | 2.33074900  | -2.08721300 | 2.28870700  |
| H | -2.16603400 | 4.02475100  | -1.01325400 |
| C | 0.00001200  | 4.17688300  | -1.07944700 |
| H | 2.16605700  | 4.02474400  | -1.01324700 |
| H | 0.00001400  | 5.22883500  | -1.35151100 |
| H | -0.00001600 | -1.79339200 | 0.92893600  |
| H | -0.91002100 | -3.34371600 | 0.58531300  |
| C | 0.00004100  | -2.91658000 | 0.10999500  |
| H | 0.91006000  | -3.34368600 | 0.58541600  |
| O | 0.00010800  | -2.70178700 | -1.15153900 |

#### TSC2-2

|    | x           | y           | z           |
|----|-------------|-------------|-------------|
| Ni | -0.16270900 | 0.46399600  | -0.14266200 |
| P  | 1.85908300  | 1.56092600  | 0.01048700  |
| P  | -2.42666000 | 0.01751500  | 0.01540400  |
| C  | -0.80883400 | 2.26703000  | 0.00604800  |
| O  | 1.40698300  | 3.17526900  | -0.01129600 |
| C  | 2.79066200  | 1.53385100  | 1.68562600  |
| C  | 3.02049600  | 1.61011100  | -1.49424900 |
| O  | -3.09431800 | 1.55547200  | 0.04220600  |
| C  | -3.11368100 | -0.63586500 | 1.68319000  |
| C  | -3.39892200 | -0.62549600 | -1.48945900 |
| C  | 0.04297500  | 3.38198800  | 0.02059800  |
| C  | -2.17435500 | 2.58354100  | 0.04988400  |
| C  | -0.39991300 | 4.70500200  | 0.06537500  |
| C  | -2.67546300 | 3.88579700  | 0.09684900  |
| H  | 0.32488000  | 5.51261700  | 0.07080100  |
| C  | -1.77240100 | 4.94807400  | 0.10253500  |
| H  | -3.74829500 | 4.04635700  | 0.12594900  |
| H  | -2.13971800 | 5.96985100  | 0.13819700  |
| H  | 1.49876400  | -2.10513200 | -2.97563100 |
| H  | -0.25695200 | -2.34293300 | -2.91864600 |
| C  | 0.54924700  | -1.63208500 | -2.68992700 |
| H  | 0.40784600  | -0.75201100 | -3.33037500 |
| O  | 0.54694400  | -1.21973500 | -1.34460000 |
| C  | 2.32092000  | -2.59748600 | 0.16570900  |
| C  | 2.42883500  | -3.06265300 | 1.64120900  |
| C  | 1.42876000  | -4.16164500 | 2.05606000  |
| C  | -0.00638000 | -3.92856800 | 1.53903700  |
| C  | -0.11498800 | -3.45641600 | 0.06420600  |
| H  | 3.45023200  | -3.41059100 | 1.86830600  |
| H  | 3.04490800  | -1.78017200 | 0.04536800  |
| H  | 1.79088100  | -5.13628800 | 1.71392200  |
| H  | 1.40686900  | -4.23307500 | 3.15330000  |

|   |             |             |             |
|---|-------------|-------------|-------------|
| H | -0.59144600 | -4.84984800 | 1.69653200  |
| H | -0.47226100 | -3.16342100 | 2.17665700  |
| H | -1.18362300 | -3.27536400 | -0.12221000 |
| H | 2.25767600  | -2.18820100 | 2.28688700  |
| C | 0.30601700  | -4.55919000 | -0.94541500 |
| H | -0.26148700 | -5.48541900 | -0.75643000 |
| H | 0.00909700  | -4.23907800 | -1.95318400 |
| C | 2.75942100  | -3.69284300 | -0.84312900 |
| H | 3.76690200  | -4.06370400 | -0.59126400 |
| C | 1.81176300  | -4.90677400 | -0.96598600 |
| H | 2.86451500  | -3.22568200 | -1.83275600 |
| H | 2.02910400  | -5.61625200 | -0.16121900 |
| H | 2.04154400  | -5.45030200 | -1.89396100 |
| B | 0.78620400  | -2.10426000 | -0.10727000 |
| H | 0.44531500  | -1.22499600 | 0.76981100  |
| C | -4.40275700 | 0.11180700  | 2.08738400  |
| H | -5.22272400 | -0.04640200 | 1.38291900  |
| H | -4.72580700 | -0.27150500 | 3.06414700  |
| H | -4.23981500 | 1.18751800  | 2.18080600  |
| C | -3.39644100 | -2.14887700 | 1.65488700  |
| H | -2.53715400 | -2.73421600 | 1.32239500  |
| H | -3.64268800 | -2.47744100 | 2.67278000  |
| H | -4.25332400 | -2.39349000 | 1.01981200  |
| C | -2.02722800 | -0.33500000 | 2.73926000  |
| H | -1.09804200 | -0.87189000 | 2.53171600  |
| H | -1.79812800 | 0.73512500  | 2.79099900  |
| H | -2.39320700 | -0.64662500 | 3.72637500  |
| C | 3.65698000  | 0.23733400  | -1.77250300 |
| H | 2.90106600  | -0.54576700 | -1.84236500 |
| H | 4.19598600  | 0.28701800  | -2.72775200 |
| H | 4.37949700  | -0.05185500 | -1.00477700 |
| C | 1.74065200  | 1.14216600  | 2.74864000  |
| H | 0.89675400  | 1.84060700  | 2.76202300  |
| H | 1.34800900  | 0.13599800  | 2.57941500  |
| H | 2.21132800  | 1.16632900  | 3.74021600  |
| C | 3.94372200  | 0.51458700  | 1.71012800  |
| H | 4.76415800  | 0.80263500  | 1.04545900  |
| H | 4.35066300  | 0.47242900  | 2.72867000  |
| H | 3.61865800  | -0.49307500 | 1.44605600  |
| C | 3.34258700  | 2.93205200  | 2.03974200  |
| H | 3.81922100  | 2.86848300  | 3.02659200  |
| H | 4.09644900  | 3.28131700  | 1.33033400  |
| H | 2.55188800  | 3.68349000  | 2.09084900  |
| C | 4.11619000  | 2.68381300  | -1.34933300 |
| H | 4.85185700  | 2.42107700  | -0.58362200 |
| H | 4.65447800  | 2.76616300  | -2.30272200 |
| H | 3.69852100  | 3.66673600  | -1.11343000 |
| C | 2.10578400  | 1.98778000  | -2.68326800 |
| H | 1.30159200  | 1.25910400  | -2.82120600 |
| H | 1.65771500  | 2.97726200  | -2.55522400 |
| H | 2.70800100  | 2.00395300  | -3.60065000 |
| C | -3.11114500 | -2.10591300 | -1.79303100 |
| H | -3.51211800 | -2.77642700 | -1.02945900 |
| H | -3.59120600 | -2.36795000 | -2.74496600 |
| H | -2.04320500 | -2.30361300 | -1.88936100 |
| C | -2.89705600 | 0.23585400  | -2.67232100 |
| H | -3.11670800 | 1.29737600  | -2.52507600 |
| H | -1.81939100 | 0.12401100  | -2.82538100 |

|   |             |             |             |
|---|-------------|-------------|-------------|
| H | -3.40484300 | -0.09096800 | -3.58881000 |
| C | -4.91766400 | -0.41487000 | -1.32797000 |
| H | -5.40661900 | -0.64398300 | -2.28390800 |
| H | -5.34878000 | -1.08293800 | -0.57621000 |
| H | -5.16188800 | 0.61727500  | -1.06331200 |

**TSD1-2**

|    | x           | y           | z           |
|----|-------------|-------------|-------------|
| C  | -2.65938500 | -0.07425700 | -4.29151600 |
| C  | -2.16711900 | -0.38650900 | -3.02291900 |
| C  | -1.87375900 | 0.56853500  | -2.03703900 |
| C  | -2.12924600 | 1.89300500  | -2.42177500 |
| C  | -2.62152000 | 2.26349100  | -3.67442200 |
| C  | -2.88345300 | 1.26414200  | -4.61040700 |
| H  | -2.85662700 | -0.87254300 | -4.99954900 |
| H  | -2.78766900 | 3.31286300  | -3.89520100 |
| H  | -3.26598200 | 1.52946400  | -5.59196900 |
| O  | -1.88156800 | 2.90818300  | -1.52093500 |
| O  | -1.96354000 | -1.72014600 | -2.73983100 |
| P  | -1.32219200 | 2.39950400  | -0.02673700 |
| P  | -1.46262700 | -2.02637200 | -1.17018000 |
| C  | 0.20677000  | 3.52904300  | 0.04987500  |
| C  | -2.76436300 | 3.03143400  | 1.06750200  |
| C  | -0.00067000 | -3.16257700 | -1.59390700 |
| C  | -3.00282500 | -2.98777800 | -0.54860100 |
| H  | 2.43052700  | -1.11083800 | 1.60040400  |
| C  | 1.95851700  | -0.25634800 | 1.09708900  |
| O  | 0.58786700  | -0.41234500 | 1.02278300  |
| O  | 2.46786000  | -0.17556500 | -0.23864000 |
| H  | 2.24397900  | 0.66265500  | 1.62637500  |
| Ni | -1.11218200 | 0.10875700  | -0.33484300 |
| C  | -3.76403400 | 1.86003400  | 1.18349100  |
| H  | -3.32276600 | 0.99784400  | 1.68958800  |
| H  | -4.63596600 | 2.19208300  | 1.76230000  |
| H  | -4.12116500 | 1.53365800  | 0.20057300  |
| C  | -2.29327200 | 3.44518600  | 2.47342600  |
| H  | -1.69797900 | 4.36278900  | 2.45084200  |
| H  | -3.17595400 | 3.64460100  | 3.09443600  |
| H  | -1.71342000 | 2.66575900  | 2.97156900  |
| C  | -3.49129000 | 4.22117100  | 0.40385100  |
| H  | -4.32225000 | 4.51835500  | 1.05695100  |
| H  | -2.84680600 | 5.09312300  | 0.27150500  |
| H  | -3.90394100 | 3.95453500  | -0.57148200 |
| C  | -0.15105900 | 5.00956100  | -0.18416100 |
| H  | -0.70849600 | 5.43880700  | 0.65358300  |
| H  | 0.78021300  | 5.58276400  | -0.28213400 |
| H  | -0.72884000 | 5.14997900  | -1.10174600 |
| C  | 0.96773300  | 3.38009500  | 1.37816800  |
| H  | 1.93020000  | 3.90187300  | 1.29585100  |
| H  | 0.42979800  | 3.81824000  | 2.22229900  |
| H  | 1.17105200  | 2.33518800  | 1.61517500  |
| C  | 1.10918300  | 3.04448300  | -1.10920000 |
| H  | 1.40722100  | 1.99879300  | -0.99064700 |
| H  | 0.61661800  | 3.15687300  | -2.07948900 |
| H  | 2.01985000  | 3.65774200  | -1.12287200 |
| C  | 0.94739200  | -2.29127500 | -2.45006700 |
| H  | 0.47426700  | -1.97688600 | -3.38473600 |
| H  | 1.28969700  | -1.40739000 | -1.90672800 |

|   |             |             |             |
|---|-------------|-------------|-------------|
| H | 1.83139900  | -2.89057100 | -2.70551900 |
| C | 0.74111700  | -3.61214700 | -0.32299500 |
| H | 1.65821900  | -4.13844600 | -0.61807600 |
| H | 1.01728900  | -2.75674100 | 0.29524300  |
| H | 0.14930900  | -4.30031200 | 0.28676900  |
| C | -0.43264900 | -4.38630900 | -2.42477400 |
| H | 0.46954200  | -4.91529100 | -2.75874000 |
| H | -1.02892000 | -5.09674000 | -1.84496200 |
| H | -0.99782600 | -4.09477000 | -3.31481400 |
| C | -2.65649300 | -4.04120100 | 0.51909200  |
| H | -3.59202200 | -4.46379000 | 0.90814900  |
| H | -2.07276400 | -4.87063000 | 0.10876200  |
| H | -2.11212900 | -3.61873800 | 1.36500400  |
| C | -3.74174600 | -3.67554100 | -1.71775300 |
| H | -3.13645000 | -4.43885000 | -2.21191800 |
| H | -4.63258300 | -4.17096800 | -1.31006600 |
| H | -4.06725600 | -2.95818000 | -2.47392800 |
| C | -3.94738300 | -1.93216000 | 0.06697300  |
| H | -3.49823800 | -1.44375200 | 0.93583600  |
| H | -4.21874500 | -1.15787900 | -0.65893400 |
| H | -4.87280400 | -2.42656900 | 0.39064100  |
| C | 4.97200200  | 0.11553900  | 0.55500800  |
| C | 5.93034100  | -1.09211600 | 0.32785000  |
| C | 6.40030100  | -1.30167800 | -1.12870700 |
| C | 5.28400700  | -1.16399200 | -2.18752800 |
| C | 4.32357800  | 0.04540500  | -1.98552800 |
| H | 6.81046300  | -0.99903600 | 0.98127000  |
| H | 4.64653500  | 0.07685900  | 1.60351500  |
| H | 7.20967400  | -0.60218800 | -1.35641700 |
| H | 6.84852100  | -2.30095300 | -1.21360100 |
| H | 5.73977700  | -1.12195000 | -3.18807300 |
| H | 4.67325500  | -2.07934300 | -2.17499000 |
| H | 3.51167000  | -0.04640400 | -2.71955300 |
| H | 5.40615400  | -2.00040900 | 0.66121000  |
| C | 4.98948600  | 1.43749100  | -2.18807900 |
| H | 5.44792300  | 1.49671100  | -3.18659000 |
| H | 4.18885300  | 2.19205200  | -2.18197300 |
| C | 5.62743600  | 1.51160700  | 0.33013000  |
| H | 6.50311300  | 1.62330900  | 0.98663200  |
| C | 6.04123300  | 1.82665200  | -1.12476500 |
| H | 4.90713800  | 2.27478200  | 0.66217700  |
| H | 6.99151900  | 1.33388200  | -1.35015900 |
| H | 6.24715300  | 2.90263900  | -1.20693600 |
| B | 3.79818900  | -0.01905100 | -0.49898800 |
| C | -0.14680600 | 0.38532000  | 3.52928600  |
| C | -1.41588500 | 0.27320600  | 4.41699600  |
| C | -1.76715800 | -1.15411000 | 4.88688400  |
| C | -1.64518100 | -2.22563700 | 3.78315800  |
| C | -0.37970600 | -2.11107800 | 2.89316600  |
| H | -1.32821200 | 0.92412100  | 5.30243400  |
| H | -0.06683000 | 1.44348000  | 3.23716600  |
| H | -1.13322300 | -1.42780000 | 5.73592500  |
| H | -2.79364300 | -1.15864700 | 5.28118600  |
| H | -1.70630900 | -3.22233300 | 4.25039800  |
| H | -2.52752300 | -2.14339700 | 3.13114600  |
| H | -0.46916300 | -2.88634000 | 2.12028200  |
| H | -2.27039100 | 0.65841000  | 3.84260200  |
| C | 0.92629500  | -2.44197100 | 3.66215200  |



|   |             |             |            |
|---|-------------|-------------|------------|
| H | 0.84573600  | -3.42836700 | 4.14790400 |
| H | 1.73850500  | -2.54993900 | 2.92858500 |
| C | 1.15381800  | 0.06909000  | 4.31868700 |
| H | 1.20522500  | 0.69150100  | 5.22693900 |
| C | 1.35155200  | -1.40839100 | 4.72941100 |
| H | 2.01560900  | 0.37995000  | 3.71240200 |
| H | 0.80060000  | -1.60239700 | 5.65469200 |
| H | 2.40798200  | -1.57023000 | 4.98776100 |
| B | -0.34834400 | -0.61110000 | 2.24909600 |
| H | -1.44702800 | -0.36497900 | 1.64921200 |

**TSF1-2**

|   | x           | y           | z           |
|---|-------------|-------------|-------------|
| H | 0.44865200  | 2.54995500  | 1.28903600  |
| C | 0.65805100  | 2.70061200  | 0.22645000  |
| O | -0.09545800 | 0.87745500  | -0.06805000 |
| O | 1.70133900  | 2.24456900  | -0.32347500 |
| H | 0.09863200  | 3.50085300  | -0.27464700 |
| C | 2.07881200  | 0.10054700  | 1.27011600  |
| C | 1.75323800  | -1.41290600 | 1.38075600  |
| C | 2.16169800  | -2.26670500 | 0.15750500  |
| C | 1.84461000  | -1.63334500 | -1.21861100 |
| C | 2.12818100  | -0.11250500 | -1.33373700 |
| H | 2.22261300  | -1.83710500 | 2.28109800  |
| H | 1.64290000  | 0.58472700  | 2.16017800  |
| H | 3.23070900  | -2.49240800 | 0.21641200  |
| H | 1.65857300  | -3.24143500 | 0.22386700  |
| H | 2.40116700  | -2.17883100 | -1.99569700 |
| H | 0.78403400  | -1.79713400 | -1.44865100 |
| H | 1.71728200  | 0.22866300  | -2.29593400 |
| H | 0.67012300  | -1.51445700 | 1.53649400  |
| C | 3.64006300  | 0.24395600  | -1.32558900 |
| H | 4.16017200  | -0.29515400 | -2.13160000 |
| H | 3.73219000  | 1.31159000  | -1.56552500 |
| C | 3.59682400  | 0.42833100  | 1.26855300  |
| H | 4.08044400  | 0.00052500  | 2.15967500  |
| C | 4.36916800  | -0.02853200 | 0.00954300  |
| H | 3.69987000  | 1.51854400  | 1.36114400  |
| H | 4.60142100  | -1.09506100 | 0.08916100  |
| H | 5.34400700  | 0.47800900  | -0.00897000 |
| B | 1.46080700  | 0.64322400  | -0.09927200 |
| C | -2.61192400 | 1.28792200  | 0.11769800  |
| C | -3.46059200 | 1.13361600  | -1.17740700 |
| C | -3.80623100 | -0.32080600 | -1.56483200 |
| C | -2.62773600 | -1.31129400 | -1.44230000 |
| C | -1.76645600 | -1.17480800 | -0.15059300 |
| H | -4.39028800 | 1.71611900  | -1.09293600 |
| H | -2.33340000 | 2.34999300  | 0.20205300  |
| H | -4.64593100 | -0.67242400 | -0.95845600 |
| H | -4.17181100 | -0.33290800 | -2.60043400 |
| H | -3.01189100 | -2.33872400 | -1.52574300 |
| H | -1.95861200 | -1.17184800 | -2.30431500 |
| H | -0.92120400 | -1.86428200 | -0.24797300 |
| H | -2.89441000 | 1.59059400  | -2.00282500 |
| C | -2.51230400 | -1.54804600 | 1.16563900  |
| H | -2.89062100 | -2.57878600 | 1.09789100  |
| H | -1.77041600 | -1.55592300 | 1.97810000  |
| C | -3.34879700 | 0.89259400  | 1.42815300  |

|   |             |             |             |
|---|-------------|-------------|-------------|
| H | -4.27733100 | 1.47373600  | 1.53172400  |
| C | -3.67106800 | -0.61068200 | 1.56806500  |
| H | -2.71175800 | 1.19335800  | 2.27380100  |
| H | -4.56054700 | -0.85188200 | 0.97923800  |
| H | -3.94811800 | -0.81788700 | 2.61048300  |
| B | -1.34215100 | 0.34791500  | -0.03691200 |

[Ni]OBBN

|    | x           | y           | z           |
|----|-------------|-------------|-------------|
| Ni | 0.58143800  | 0.03515000  | 0.05155000  |
| P  | 1.09138200  | -2.15219300 | 0.03502100  |
| P  | 0.70640700  | 2.27670300  | 0.00568300  |
| C  | 2.47650800  | 0.19993200  | -0.14355100 |
| O  | 2.77192600  | -2.17220100 | 0.00831500  |
| C  | 0.76216000  | -3.10168200 | 1.63941000  |
| C  | 0.74941800  | -3.16078900 | -1.54216500 |
| O  | 2.33107400  | 2.58903800  | -0.28515000 |
| C  | 0.46435900  | 3.13686600  | 1.67822300  |
| C  | -0.06441900 | 3.22227600  | -1.44867300 |
| C  | 3.33325800  | -0.90936300 | -0.12761800 |
| C  | 3.11427300  | 1.44117100  | -0.27998400 |
| C  | 1.35014400  | -4.52414700 | 1.64417300  |
| C  | -0.75334200 | -3.13840000 | 1.92263300  |
| C  | 1.44915500  | -2.26873800 | 2.74680100  |
| C  | -0.67302600 | -3.74410800 | -1.53609600 |
| C  | 1.78196500  | -4.28548500 | -1.75979100 |
| C  | 0.87564600  | -2.14665700 | -2.70303600 |
| C  | 1.44992000  | 2.43651900  | 2.64296800  |
| C  | 0.79070900  | 4.64092600  | 1.64045000  |
| C  | -0.97144200 | 2.90029300  | 2.18931200  |
| C  | -0.02106800 | 2.23647500  | -2.63918900 |
| C  | 0.73958600  | 4.48398000  | -1.82404200 |
| C  | -1.52755400 | 3.59827900  | -1.15304800 |
| C  | 4.72087900  | -0.81953800 | -0.24480200 |
| C  | 4.49576700  | 1.59325100  | -0.40323000 |
| H  | 1.25376300  | -4.94616600 | 2.65317400  |
| H  | 2.41222200  | -4.52760200 | 1.37969400  |
| H  | 0.81657600  | -5.19250800 | 0.96158300  |
| H  | -0.91606500 | -3.56655800 | 2.92034400  |
| H  | -1.29785000 | -3.76173500 | 1.20747600  |
| H  | -1.18673800 | -2.13482700 | 1.90334800  |
| H  | 2.53202400  | -2.21120600 | 2.60247200  |
| H  | 1.25878400  | -2.74575900 | 3.71664600  |
| H  | 1.05031700  | -1.24962100 | 2.79036700  |
| H  | -0.78723400 | -4.54799400 | -0.80195600 |
| H  | -0.88893900 | -4.17133400 | -2.52395600 |
| H  | -1.42838600 | -2.98012200 | -1.33705300 |
| H  | 2.80470000  | -3.90111400 | -1.75846100 |
| H  | 1.59118100  | -4.74750000 | -2.73732800 |
| H  | 1.71138100  | -5.07265000 | -1.00548800 |
| H  | 0.72022900  | -2.67147600 | -3.65472100 |
| H  | 1.86750600  | -1.68344400 | -2.73346600 |
| H  | 0.12899300  | -1.34965600 | -2.62804000 |
| H  | 1.33296900  | 2.87418100  | 3.64258500  |
| H  | 2.49140900  | 2.56857200  | 2.33536500  |
| H  | 1.24746400  | 1.36327700  | 2.71988500  |
| H  | 1.78726600  | 4.83066300  | 1.22908400  |
| H  | 0.76946500  | 5.03640300  | 2.66450300  |

|   |             |             |             |
|---|-------------|-------------|-------------|
| H | 0.05793800  | 5.20880400  | 1.05918600  |
| H | -1.03647600 | 3.24287900  | 3.23042100  |
| H | -1.24136200 | 1.84099800  | 2.15407400  |
| H | -1.71587800 | 3.45942300  | 1.61587900  |
| H | -0.63078300 | 1.34728800  | -2.45069900 |
| H | 1.00200300  | 1.91097600  | -2.85785700 |
| H | -0.41252300 | 2.73631000  | -3.53479300 |
| H | 1.78192400  | 4.24562900  | -2.04872000 |
| H | 0.72512400  | 5.24127000  | -1.03644400 |
| H | 0.28874800  | 4.92987700  | -2.72036400 |
| H | -1.99710100 | 3.96033400  | -2.07669300 |
| H | -1.60443000 | 4.40006200  | -0.41232600 |
| H | -2.11057100 | 2.74386000  | -0.79916500 |
| H | 5.32728400  | -1.71941400 | -0.22676000 |
| C | 5.29252000  | 0.44660500  | -0.38492100 |
| H | 4.92623800  | 2.58433900  | -0.50430100 |
| H | 6.37087900  | 0.54105100  | -0.47878500 |
| O | -1.25590100 | -0.04802000 | 0.46266900  |
| C | -3.23723500 | -0.67086600 | -1.18110400 |
| C | -4.08163800 | -1.94891900 | -0.90680700 |
| C | -5.09093700 | -1.84876300 | 0.25823800  |
| C | -4.52732000 | -1.17162800 | 1.52551400  |
| C | -3.70407300 | 0.11829100  | 1.26853600  |
| H | -4.61852300 | -2.25532800 | -1.81894800 |
| H | -2.49786100 | -0.92357100 | -1.95835100 |
| H | -5.98756800 | -1.31745700 | -0.07462700 |
| H | -5.43500700 | -2.86072600 | 0.51527000  |
| H | -5.35783300 | -0.97058200 | 2.22125100  |
| H | -3.87324500 | -1.88998100 | 2.04359000  |
| H | -3.28227400 | 0.43560800  | 2.23378200  |
| H | -3.39074500 | -2.77375100 | -0.67979600 |
| C | -4.54474400 | 1.30491800  | 0.71809600  |
| H | -5.39171900 | 1.52327700  | 1.38835800  |
| H | -3.90961000 | 2.20325800  | 0.74595100  |
| C | -4.08285300 | 0.51489000  | -1.72558900 |
| H | -4.63259500 | 0.21066000  | -2.63079300 |
| C | -5.08554500 | 1.13059000  | -0.72095300 |
| H | -3.38755400 | 1.30051900  | -2.05516600 |
| H | -5.99352800 | 0.52078600  | -0.69646700 |
| H | -5.40964100 | 2.11050500  | -1.09968900 |
| B | -2.54893000 | -0.19964000 | 0.19355000  |

**[Ni]OCH<sub>2</sub>OBBN**

|   | x           | y           | z           |
|---|-------------|-------------|-------------|
| C | -5.26815800 | 0.21217300  | -0.40014100 |
| C | -3.94455700 | -0.20418600 | -0.25355800 |
| C | -2.86470300 | 0.67953700  | -0.12664900 |
| C | -3.19153200 | 2.04229700  | -0.16111800 |
| C | -4.49607200 | 2.51665300  | -0.30481200 |
| C | -5.52970100 | 1.58432400  | -0.42265200 |
| H | -6.06375900 | -0.52004700 | -0.49375000 |
| H | -4.68867500 | 3.58451700  | -0.32577100 |
| H | -6.55305600 | 1.93185000  | -0.53548800 |
| O | -2.16373300 | 2.97175000  | -0.05029700 |
| O | -3.68597300 | -1.57229500 | -0.23126500 |
| P | -0.63905400 | 2.26419400  | 0.05209100  |
| P | -2.05808300 | -1.93291800 | -0.01186200 |
| C | 0.19150400  | 2.94898300  | -1.50407900 |

|    |             |             |             |
|----|-------------|-------------|-------------|
| C  | -0.01437300 | 3.05561500  | 1.66095100  |
| C  | -1.69504300 | -2.98112100 | -1.54470600 |
| C  | -2.16888100 | -2.94240000 | 1.59594700  |
| H  | 1.79013500  | -2.01734500 | 0.85802500  |
| C  | 1.48076900  | -0.96362500 | 0.99273000  |
| O  | 0.73953800  | -0.51263300 | -0.04652300 |
| O  | 2.70343100  | -0.18778000 | 1.16431900  |
| H  | 0.98570300  | -0.87432500 | 1.97438700  |
| Ni | -1.06386700 | 0.07438600  | 0.02996900  |
| C  | 5.14861300  | 0.41768800  | 0.76552100  |
| C  | 6.22870700  | -0.51240700 | 1.39054200  |
| C  | 6.51451300  | -1.81175300 | 0.60496300  |
| C  | 5.25125400  | -2.54565400 | 0.10016400  |
| C  | 4.15264600  | -1.63559200 | -0.52346200 |
| H  | 7.17214500  | 0.03763000  | 1.52941300  |
| H  | 4.95441300  | 1.22786200  | 1.48220800  |
| H  | 7.17192000  | -1.59159800 | -0.24153800 |
| H  | 7.08777700  | -2.49541600 | 1.24635200  |
| H  | 5.55188800  | -3.32263300 | -0.61925300 |
| H  | 4.79752600  | -3.08205300 | 0.94742200  |
| H  | 3.28407100  | -2.27110800 | -0.73932400 |
| H  | 5.88864800  | -0.78283600 | 2.40160600  |
| C  | 4.56146100  | -0.96050900 | -1.86692900 |
| H  | 4.84555100  | -1.72955100 | -2.60153000 |
| H  | 3.66469500  | -0.47195500 | -2.27540800 |
| C  | 5.55883600  | 1.06711800  | -0.58572800 |
| H  | 6.50023700  | 1.62655500  | -0.47215000 |
| C  | 5.69398300  | 0.08627400  | -1.77150400 |
| H  | 4.79423100  | 1.81672300  | -0.83902800 |
| H  | 6.66067700  | -0.42326400 | -1.71793800 |
| H  | 5.72225200  | 0.66178200  | -2.70724500 |
| B  | 3.86118300  | -0.46872900 | 0.51064700  |
| C  | -0.68674900 | 2.46404200  | -2.68118500 |
| H  | -0.75316600 | 1.37144800  | -2.71286500 |
| H  | -1.70169300 | 2.86934700  | -2.63063700 |
| H  | -0.23221800 | 2.80060800  | -3.62168500 |
| C  | 1.59886600  | 2.33301500  | -1.65349000 |
| H  | 1.57518600  | 1.24366700  | -1.55573100 |
| H  | 1.99214100  | 2.59206600  | -2.64535600 |
| H  | 2.30087200  | 2.71945600  | -0.90981000 |
| C  | 0.26208400  | 4.48656000  | -1.53628300 |
| H  | 0.96380900  | 4.88263900  | -0.79609000 |
| H  | 0.61753500  | 4.80657200  | -2.52461100 |
| H  | -0.71896600 | 4.94288300  | -1.36931800 |
| C  | -0.19686700 | -3.35391900 | -1.56743200 |
| H  | 0.04490300  | -3.78643300 | -2.54714100 |
| H  | 0.43485300  | -2.47369700 | -1.40926800 |
| H  | 0.05664200  | -4.10303800 | -0.81141700 |
| C  | -1.98760400 | -2.04880700 | -2.74394100 |
| H  | -3.03644900 | -1.73907700 | -2.77639400 |
| H  | -1.36212400 | -1.15022000 | -2.71874500 |
| H  | -1.76297000 | -2.58830000 | -3.67279300 |
| C  | -2.57586700 | -4.23758900 | -1.66261700 |
| H  | -2.41702400 | -4.69516000 | -2.64804300 |
| H  | -2.32196900 | -4.99281000 | -0.91221900 |
| H  | -3.64025100 | -3.99801600 | -1.57272900 |
| C  | -0.91675800 | -3.81482200 | 1.80250300  |
| H  | -0.93954500 | -4.23609700 | 2.81587200  |

|   |             |             |            |
|---|-------------|-------------|------------|
| H | -0.88051000 | -4.65448600 | 1.10173000 |
| H | 0.01214400  | -3.24453900 | 1.70415600 |
| C | -3.43689400 | -3.81793000 | 1.65665400 |
| H | -3.42555100 | -4.62356300 | 0.91903500 |
| H | -3.49623400 | -4.28064300 | 2.65057700 |
| H | -4.34184000 | -3.22531100 | 1.50200600 |
| C | -2.24598200 | -1.88983200 | 2.72653800 |
| H | -1.34060300 | -1.27623400 | 2.77493500 |
| H | -3.10309900 | -1.21989300 | 2.60170700 |
| H | -2.35860600 | -2.40469100 | 3.68960000 |
| C | -0.60655300 | 2.18502100  | 2.79343900 |
| H | -0.21822500 | 1.16195300  | 2.76056400 |
| H | -0.33008600 | 2.62045800  | 3.76244500 |
| H | -1.70001000 | 2.13970200  | 2.74561700 |
| C | 1.52323900  | 3.01802900  | 1.74613600 |
| H | 1.98551400  | 3.72075800  | 1.04556500 |
| H | 1.82526600  | 3.32371900  | 2.75660300 |
| H | 1.93315900  | 2.01986800  | 1.56384600 |
| C | -0.52355100 | 4.50098000  | 1.83767400 |
| H | -0.21044800 | 4.86106500  | 2.82652900 |
| H | -0.10962300 | 5.18508100  | 1.09309500 |
| H | -1.61364900 | 4.55649900  | 1.78344000 |

**HBPin**

|   | x           | y           | z           |
|---|-------------|-------------|-------------|
| C | 0.78911700  | -0.19154400 | -0.04499700 |
| C | -0.78913500 | -0.19142900 | 0.04501600  |
| C | 1.47980600  | -0.48365300 | 1.29346800  |
| H | 1.36050400  | -1.53119800 | 1.58923700  |
| H | 2.54904800  | -0.27291300 | 1.19421600  |
| H | 1.08469100  | 0.15045700  | 2.09324200  |
| C | 1.37939500  | -1.07386800 | -1.14339500 |
| H | 2.46908900  | -0.97024400 | -1.14898000 |
| H | 1.14040300  | -2.12907500 | -0.96788400 |
| H | 1.00991600  | -0.79232000 | -2.13201800 |
| C | -1.37962800 | -1.07377500 | 1.14331600  |
| H | -2.46934000 | -0.97034500 | 1.14864600  |
| H | -1.14041500 | -2.12894400 | 0.96789400  |
| H | -1.01046300 | -0.79216800 | 2.13204000  |
| O | 1.08616000  | 1.20092800  | -0.36715800 |
| O | -1.08599400 | 1.20106900  | 0.36725100  |
| B | 0.00014400  | 1.94493200  | 0.00002000  |
| H | 0.00033100  | 3.13488400  | -0.00002900 |
| C | -1.47981300 | -0.48340000 | -1.29348700 |
| H | -1.36078500 | -1.53099800 | -1.58920700 |
| H | -2.54899000 | -0.27232700 | -1.19426200 |
| H | -1.08449000 | 0.15056500  | -2.09327400 |

**cis-HCOOBPin**

|   | x           | y           | z           |
|---|-------------|-------------|-------------|
| H | -4.19173200 | -0.41568800 | -0.75124600 |
| O | -3.33141500 | 0.53913400  | 0.83045700  |
| C | -3.30583300 | -0.14123600 | -0.15929800 |
| O | -2.20942400 | -0.72139300 | -0.70024500 |
| C | 1.27821400  | -0.69887500 | 0.15195100  |
| C | 0.98410300  | 0.83927800  | -0.07843900 |
| C | 2.48573800  | -1.24965000 | -0.60234000 |
| H | 3.40809900  | -0.76010200 | -0.26980900 |
| H | 2.58209500  | -2.32229800 | -0.40664100 |

|   |             |             |             |
|---|-------------|-------------|-------------|
| H | 2.38643500  | -1.11160200 | -1.68123600 |
| C | 1.35108100  | -1.09058000 | 1.63279100  |
| H | 1.34894600  | -2.18205500 | 1.71100100  |
| H | 2.26380300  | -0.71283700 | 2.10507200  |
| H | 0.48898000  | -0.70979900 | 2.18939000  |
| C | 1.42566400  | 1.34517700  | -1.45715300 |
| H | 1.01183500  | 2.34545400  | -1.61691800 |
| H | 2.51618000  | 1.40692000  | -1.53388400 |
| H | 1.05851900  | 0.69581700  | -2.25844400 |
| O | 0.07536800  | -1.33004300 | -0.38421900 |
| O | -0.47570600 | 0.88267600  | -0.06838300 |
| B | -0.90255000 | -0.37838200 | -0.35914700 |
| C | 1.49661300  | 1.77064500  | 1.01703800  |
| H | 2.58987600  | 1.73015700  | 1.08207200  |
| H | 1.20833900  | 2.80084400  | 0.78570100  |
| H | 1.07731300  | 1.51554900  | 1.99249500  |

**trans-HCOOBPin**

|   | x           | y           | z           |
|---|-------------|-------------|-------------|
| O | 2.20343900  | -0.67104100 | -0.16366400 |
| C | 3.17138200  | 0.25930900  | 0.07533500  |
| O | 4.33786500  | -0.01136600 | 0.04368600  |
| H | 2.76733000  | 1.26055200  | 0.29251600  |
| C | -1.06175500 | 0.84297000  | 0.03038900  |
| C | -1.37491300 | -0.70712100 | -0.01076200 |
| C | -1.24431000 | 1.53818700  | -1.32391600 |
| H | -2.30240800 | 1.63023800  | -1.58927200 |
| H | -0.81568500 | 2.54355700  | -1.26872400 |
| H | -0.73311400 | 0.99522300  | -2.12535000 |
| C | -1.77746500 | 1.62380100  | 1.12895200  |
| H | -1.46520500 | 2.67249200  | 1.09760700  |
| H | -2.86310400 | 1.58990300  | 0.98394600  |
| H | -1.54538000 | 1.23203800  | 2.12157800  |
| C | -2.43228100 | -1.12816700 | -1.02790500 |
| H | -2.54977700 | -2.21602600 | -1.00382900 |
| H | -3.40226600 | -0.67691800 | -0.79008800 |
| H | -2.15304800 | -0.84259900 | -2.04442600 |
| O | 0.37319800  | 0.85840800  | 0.31681700  |
| O | -0.09344200 | -1.27404400 | -0.42101900 |
| B | 0.85867900  | -0.35768900 | -0.08789900 |
| C | -1.69459700 | -1.30057100 | 1.36664900  |
| H | -2.67839900 | -0.98094800 | 1.72555100  |
| H | -1.69292300 | -2.39198300 | 1.29083500  |
| H | -0.94426300 | -1.01318400 | 2.11014800  |

**IMA1-3**

|   | x          | y           | z           |
|---|------------|-------------|-------------|
| C | 3.44247000 | 1.47422300  | -2.76453600 |
| C | 2.52633900 | 1.37061700  | -1.71685900 |
| C | 2.08714900 | 0.14814900  | -1.18728600 |
| C | 2.68590400 | -0.99065000 | -1.74627200 |
| C | 3.60406500 | -0.94587000 | -2.79594200 |
| C | 3.96969400 | 0.30087400  | -3.30533200 |
| H | 3.73137400 | 2.45273700  | -3.13405700 |
| H | 4.02166900 | -1.86746500 | -3.18807900 |
| H | 4.68225600 | 0.35902600  | -4.12340100 |
| O | 2.37674700 | -2.23552900 | -1.21800200 |
| O | 2.04505700 | 2.54849500  | -1.16739000 |

|    |             |             |             |
|----|-------------|-------------|-------------|
| P  | 1.33645500  | -2.17727300 | 0.09490500  |
| P  | 0.96323000  | 2.32267000  | 0.09458500  |
| C  | 0.06430400  | -3.46890000 | -0.46964100 |
| C  | 2.47672100  | -2.80816400 | 1.48937800  |
| C  | -0.46409900 | 3.38401000  | -0.57565500 |
| C  | 1.90536100  | 3.13072300  | 1.53854000  |
| H  | -1.31162600 | -0.27539000 | 3.53161400  |
| Ni | 0.85079100  | 0.04067500  | 0.25811800  |
| C  | 3.29929800  | -1.58182800 | 1.94570900  |
| H  | 2.65849600  | -0.80840400 | 2.37878600  |
| H  | 4.01527500  | -1.89939100 | 2.71515800  |
| H  | 3.86876900  | -1.13983700 | 1.12162600  |
| C  | 3.45981100  | -3.89473700 | 1.00847000  |
| H  | 4.16855000  | -4.10785200 | 1.81942800  |
| H  | 2.96271700  | -4.83268400 | 0.75335400  |
| H  | 4.03095300  | -3.56281700 | 0.13757200  |
| C  | 1.65551900  | -3.32076400 | 2.68791100  |
| H  | 2.33053000  | -3.48053300 | 3.53869900  |
| H  | 0.89314900  | -2.60048700 | 3.00285000  |
| H  | 1.16780000  | -4.27589400 | 2.47544800  |
| C  | 0.72636600  | -4.82601500 | -0.78269100 |
| H  | 1.03705400  | -5.35352200 | 0.12417100  |
| H  | -0.01155800 | -5.46146200 | -1.28890700 |
| H  | 1.59006600  | -4.72192200 | -1.44604700 |
| C  | -1.05568100 | -3.66420300 | 0.57138100  |
| H  | -1.78799200 | -4.36737800 | 0.15546600  |
| H  | -0.68815200 | -4.09362300 | 1.50722900  |
| H  | -1.60245100 | -2.74471300 | 0.78221300  |
| C  | -0.54693300 | -2.89893700 | -1.77122500 |
| H  | -1.06602400 | -1.95402700 | -1.59698400 |
| H  | 0.21049800  | -2.75974400 | -2.54874300 |
| H  | -1.28823000 | -3.61597000 | -2.14538200 |
| C  | -1.04187200 | 2.58629400  | -1.76789500 |
| H  | -0.28501700 | 2.42316900  | -2.54279600 |
| H  | -1.46015800 | 1.62840000  | -1.46068600 |
| H  | -1.85554000 | 3.17305300  | -2.21221100 |
| C  | -1.54702700 | 3.59266000  | 0.49887800  |
| H  | -2.38207000 | 4.14426400  | 0.04919100  |
| H  | -1.96224800 | 2.65027100  | 0.86442600  |
| H  | -1.17936500 | 4.18982300  | 1.34068900  |
| C  | 0.01925400  | 4.74765400  | -1.11678700 |
| H  | -0.81163500 | 5.20274600  | -1.67078200 |
| H  | 0.30264400  | 5.44565200  | -0.32743200 |
| H  | 0.86033500  | 4.63776000  | -1.80680000 |
| C  | 2.16623500  | 4.63819400  | 1.36288000  |
| H  | 2.86712300  | 4.96545500  | 2.14207800  |
| H  | 2.61553900  | 4.86969500  | 0.39244200  |
| H  | 1.25445400  | 5.23027100  | 1.47868600  |
| C  | 1.14053300  | 2.88409200  | 2.85604500  |
| H  | 1.73303300  | 3.28552100  | 3.68865600  |
| H  | 0.16967600  | 3.38942900  | 2.87338800  |
| H  | 0.97447300  | 1.81893500  | 3.03677700  |
| C  | 3.26963500  | 2.40761700  | 1.60361000  |
| H  | 3.15810700  | 1.32740400  | 1.73034600  |
| H  | 3.86458200  | 2.58650100  | 0.70316900  |
| H  | 3.83127600  | 2.79164400  | 2.46483200  |
| O  | -0.04006700 | -0.09365000 | 1.99936400  |
| C  | -1.21489600 | -0.22301600 | 2.43483800  |

|   |             |             |             |
|---|-------------|-------------|-------------|
| O | -2.30934600 | -0.30538800 | 1.80973700  |
| C | -4.75586400 | 0.48789300  | -0.12228500 |
| C | -4.61439300 | -0.99376900 | -0.64891000 |
| C | -5.51397600 | 1.43678700  | -1.05468800 |
| H | -6.54688900 | 1.10185200  | -1.20922300 |
| H | -5.54826100 | 2.43838400  | -0.61124200 |
| H | -5.02341900 | 1.51805100  | -2.02772300 |
| C | -5.36589500 | 0.56873400  | 1.28939700  |
| H | -5.23910300 | 1.58877600  | 1.66847100  |
| H | -6.43748700 | 0.33727000  | 1.28392600  |
| H | -4.86176500 | -0.11174900 | 1.97990000  |
| C | -4.52216100 | -1.07171100 | -2.18351800 |
| H | -4.21651400 | -2.08489900 | -2.46551200 |
| H | -5.47984700 | -0.85334900 | -2.67035900 |
| H | -3.76998900 | -0.37390200 | -2.56494500 |
| O | -3.38543900 | 0.91759600  | -0.06205300 |
| O | -3.34694700 | -1.40339200 | -0.11600600 |
| B | -2.57462100 | -0.23466000 | 0.18133300  |
| H | -1.45457200 | -0.17811000 | -0.29904800 |
| C | -5.69164200 | -1.96201000 | -0.15156200 |
| H | -6.68934300 | -1.66007800 | -0.49330800 |
| H | -5.49142200 | -2.96557100 | -0.54340600 |
| H | -5.69939000 | -2.02461600 | 0.93927200  |

### IMA2-3

|    | x           | y           | z           |
|----|-------------|-------------|-------------|
| Ni | -0.73873500 | 0.12266100  | 0.10816900  |
| P  | -1.71771000 | -1.94939400 | -0.03329600 |
| P  | -0.34458100 | 2.37365200  | 0.03626800  |
| O  | 1.11274900  | -0.47923100 | 0.58429300  |
| C  | -2.49678900 | 0.68596300  | -0.35374700 |
| O  | -3.26267900 | -1.57555000 | -0.57327000 |
| C  | -1.17068300 | -3.09015700 | -1.45091100 |
| C  | -2.17312300 | -2.85133400 | 1.58283400  |
| O  | -1.89114900 | 2.99631800  | -0.16068600 |
| C  | 0.49806700  | 3.09111400  | -1.52263900 |
| C  | 0.13315400  | 3.27520900  | 1.63339700  |
| C  | 1.33224800  | -0.73840400 | 1.86310800  |
| C  | -3.53107100 | -0.21888900 | -0.63096200 |
| C  | -2.85644200 | 2.03982700  | -0.41754800 |
| C  | -2.23909400 | -4.14369400 | -1.80645200 |
| C  | 0.16890300  | -3.78682300 | -1.14045300 |
| C  | -0.98986000 | -2.14596300 | -2.66303500 |
| C  | -0.96232000 | -3.56526300 | 2.21235800  |
| C  | -3.32510000 | -3.85820000 | 1.38427900  |
| C  | -2.65306800 | -1.73270100 | 2.53868600  |
| C  | 0.26512600  | 2.05171600  | -2.64314100 |
| C  | -0.15544400 | 4.42304100  | -1.94897700 |
| C  | 2.01305200  | 3.29076100  | -1.32817200 |
| C  | -0.87362500 | 2.78553300  | 2.70047500  |
| C  | 0.01165200  | 4.80507400  | 1.48836000  |
| C  | 1.55715700  | 2.89689200  | 2.08851800  |
| O  | 0.53920300  | -0.48605000 | 2.75534700  |
| H  | 2.29733600  | -1.22722700 | 2.03994200  |
| C  | -4.83155200 | 0.16947100  | -0.95644200 |
| C  | -4.14125400 | 2.48422500  | -0.73348100 |
| H  | -1.95316200 | -4.62087400 | -2.75268400 |
| H  | -3.22847000 | -3.69743900 | -1.93951200 |



|   |             |             |             |
|---|-------------|-------------|-------------|
| H | -2.30922800 | -4.93371300 | -1.05465200 |
| H | 0.51114400  | -4.29616300 | -2.05093100 |
| H | 0.06164000  | -4.55327300 | -0.36690700 |
| H | 0.96254300  | -3.09815600 | -0.83933300 |
| H | -1.92069500 | -1.62790900 | -2.91727500 |
| H | -0.69038900 | -2.74502300 | -3.53278000 |
| H | -0.20862200 | -1.40192600 | -2.48415500 |
| H | -0.60264100 | -4.39889700 | 1.60301900  |
| H | -1.27129200 | -3.97959600 | 3.18079400  |
| H | -0.13407700 | -2.88062800 | 2.40513400  |
| H | -4.16675800 | -3.41733000 | 0.84365600  |
| H | -3.68436900 | -4.17000900 | 2.37347000  |
| H | -3.00447700 | -4.76034900 | 0.85727600  |
| H | -2.94831300 | -2.19131600 | 3.49151400  |
| H | -3.52496000 | -1.20322500 | 2.14036300  |
| H | -1.85968500 | -1.00909300 | 2.74345600  |
| H | 0.67396600  | 2.44770000  | -3.58202600 |
| H | -0.80019100 | 1.85147900  | -2.80213700 |
| H | 0.77004600  | 1.10559300  | -2.42866900 |
| H | -1.22463900 | 4.31123800  | -2.14321400 |
| H | 0.32775100  | 4.75616200  | -2.87669900 |
| H | -0.02590700 | 5.21449100  | -1.20731200 |
| H | 2.44749900  | 3.57243000  | -2.29676900 |
| H | 2.52151100  | 2.38177600  | -0.99300200 |
| H | 2.23038100  | 4.10625900  | -0.63059900 |
| H | -0.80533700 | 1.70392500  | 2.84944700  |
| H | -1.90331500 | 3.04642700  | 2.43832000  |
| H | -0.63449900 | 3.27122900  | 3.65543200  |
| H | -0.96882600 | 5.10240300  | 1.10495500  |
| H | 0.78543600  | 5.22336800  | 0.83758400  |
| H | 0.13744900  | 5.26145300  | 2.47874300  |
| H | 1.78650000  | 3.45571600  | 3.00502000  |
| H | 2.32291700  | 3.14210100  | 1.34969000  |
| H | 1.63330900  | 1.83538200  | 2.32750400  |
| H | -5.58547700 | -0.58448300 | -1.15806000 |
| C | -5.12550500 | 1.53268900  | -1.00361100 |
| H | -4.35131800 | 3.54827000  | -0.76625800 |
| H | -6.13214000 | 1.85668000  | -1.25286200 |
| C | 4.41754100  | -1.71472400 | -0.33630300 |
| C | 4.57580400  | -0.15389700 | -0.11470700 |
| C | 4.76401300  | -2.15395900 | -1.77091000 |
| H | 5.83728400  | -2.08425600 | -1.98035900 |
| H | 4.45586800  | -3.19658300 | -1.90011600 |
| H | 4.22579700  | -1.55130700 | -2.50899000 |
| C | 5.18377500  | -2.58899500 | 0.65967300  |
| H | 4.98187000  | -3.64503400 | 0.45070300  |
| H | 6.26550700  | -2.42938300 | 0.57742500  |
| H | 4.88266100  | -2.38906500 | 1.69154000  |
| C | 5.63008200  | 0.51177300  | -1.00813800 |
| H | 5.66690800  | 1.58625200  | -0.79621700 |
| H | 6.62903500  | 0.09874400  | -0.82242800 |
| H | 5.39155400  | 0.38842500  | -2.06697300 |
| O | 3.01078000  | -1.92293300 | -0.14405800 |
| O | 3.28420500  | 0.35017500  | -0.49336900 |
| B | 2.33373800  | -0.72142900 | -0.54369600 |
| H | 1.64720800  | -0.74634000 | -1.54299400 |
| C | 4.85831600  | 0.24078000  | 1.34569700  |
| H | 5.87563400  | -0.02842900 | 1.65236400  |

|   |            |             |            |
|---|------------|-------------|------------|
| H | 4.75063300 | 1.32631100  | 1.44316500 |
| H | 4.16103600 | -0.22625200 | 2.04597000 |

**IMA4-3**

|    | x           | y           | z           |
|----|-------------|-------------|-------------|
| Ni | -0.65457100 | 0.10190800  | -0.09666900 |
| P  | -1.41979300 | -2.01849700 | -0.12398100 |
| P  | -0.48081600 | 2.35600200  | -0.07252400 |
| O  | 1.49135100  | -0.31767100 | 1.75346500  |
| C  | -2.52301400 | 0.49803600  | -0.09713200 |
| O  | -3.08897800 | -1.82606300 | -0.15509900 |
| C  | -1.16557700 | -2.98773300 | -1.73582400 |
| C  | -1.25996200 | -3.06431100 | 1.45116200  |
| O  | -2.08972100 | 2.84981600  | -0.11739700 |
| C  | 0.15642400  | 3.17596100  | -1.66779700 |
| C  | 0.04399800  | 3.24239000  | 1.52688600  |
| C  | 2.07641600  | -0.85357500 | 2.82440400  |
| C  | -3.50122100 | -0.50346700 | -0.13597500 |
| C  | -3.00410200 | 1.81283300  | -0.11728700 |
| C  | -2.29589800 | -3.99862300 | -2.00976400 |
| C  | 0.20020100  | -3.70172400 | -1.73223100 |
| C  | -1.18053800 | -1.91882300 | -2.85313000 |
| C  | 0.16146400  | -3.63826000 | 1.62079800  |
| C  | -2.29145000 | -4.20991900 | 1.49667800  |
| C  | -1.56108100 | -2.07655900 | 2.60453900  |
| C  | -0.13744100 | 2.16003000  | -2.79550700 |
| C  | -0.58606700 | 4.48972200  | -1.98551100 |
| C  | 1.67448800  | 3.42985200  | -1.60242400 |
| C  | -0.68625700 | 2.47627200  | 2.65645400  |
| C  | -0.41532200 | 4.71480800  | 1.52881300  |
| C  | 1.56175300  | 3.17500100  | 1.78602200  |
| O  | 1.63028600  | -0.74314400 | 3.94408900  |
| H  | 2.99160600  | -1.42637700 | 2.59805200  |
| C  | -4.87153000 | -0.24136900 | -0.16550700 |
| C  | -4.36229200 | 2.13410400  | -0.14617600 |
| H  | -2.13652400 | -4.44187100 | -3.00146500 |
| H  | -3.27845000 | -3.51982800 | -2.00427300 |
| H  | -2.30852100 | -4.81540000 | -1.28404000 |
| H  | 0.45552500  | -3.98704800 | -2.76112800 |
| H  | 0.17438000  | -4.61994600 | -1.13820900 |
| H  | 1.00575300  | -3.06976600 | -1.34675900 |
| H  | -2.11925900 | -1.35456900 | -2.86786600 |
| H  | -1.07335100 | -2.41687400 | -3.82554500 |
| H  | -0.35626900 | -1.20697900 | -2.74384700 |
| H  | 0.31958600  | -4.52064300 | 0.99467900  |
| H  | 0.29116700  | -3.94896600 | 2.66486700  |
| H  | 0.94699400  | -2.91755700 | 1.38645000  |
| H  | -3.30877000 | -3.85334200 | 1.31423300  |
| H  | -2.26379900 | -4.66245100 | 2.49626400  |
| H  | -2.06313700 | -5.00177200 | 0.77709500  |
| H  | -1.53853200 | -2.62938700 | 3.55197500  |
| H  | -2.55367000 | -1.62501300 | 2.50449700  |
| H  | -0.81579000 | -1.27998400 | 2.66973700  |
| H  | 0.15191700  | 2.60077900  | -3.75858800 |
| H  | -1.20072100 | 1.90261400  | -2.85111100 |
| H  | 0.43212100  | 1.23475300  | -2.66125700 |
| H  | -1.66482100 | 4.33805700  | -2.06971800 |
| H  | -0.21695500 | 4.87288300  | -2.94594900 |

|   |             |             |             |
|---|-------------|-------------|-------------|
| H | -0.40911300 | 5.26225000  | -1.23319600 |
| H | 2.03515300  | 3.66347900  | -2.61297900 |
| H | 2.22850600  | 2.56181500  | -1.23366100 |
| H | 1.91222900  | 4.28923700  | -0.96805200 |
| H | -0.32129700 | 1.44939600  | 2.74638000  |
| H | -1.77124800 | 2.45989800  | 2.51157600  |
| H | -0.48454600 | 2.98528800  | 3.60757300  |
| H | -1.47930400 | 4.81706300  | 1.29907300  |
| H | 0.15706200  | 5.32496000  | 0.82291100  |
| H | -0.24282700 | 5.13074400  | 2.52980200  |
| H | 1.74716600  | 3.54247800  | 2.80376400  |
| H | 2.12789200  | 3.81050700  | 1.10059300  |
| H | 1.95757500  | 2.16153200  | 1.71642300  |
| H | -5.58123900 | -1.06189200 | -0.18963600 |
| C | -5.28967300 | 1.09080900  | -0.16676800 |
| H | -4.67378700 | 3.17357000  | -0.15472800 |
| H | -6.35179600 | 1.31870100  | -0.18883400 |
| C | 3.79121600  | -1.38061300 | -0.79846200 |
| C | 4.18315400  | 0.09620700  | -0.40115400 |
| C | 3.34720400  | -1.49622800 | -2.26598800 |
| H | 4.18075100  | -1.32663600 | -2.95590000 |
| H | 2.95897500  | -2.50261200 | -2.44901600 |
| H | 2.55475300  | -0.77737500 | -2.49736800 |
| C | 4.86078500  | -2.43477200 | -0.50449900 |
| H | 4.48567100  | -3.42626900 | -0.78008100 |
| H | 5.77197600  | -2.24576500 | -1.08431700 |
| H | 5.12201400  | -2.45883000 | 0.55610300  |
| C | 4.77688900  | 0.93180700  | -1.53934100 |
| H | 5.00821100  | 1.93851700  | -1.17469500 |
| H | 5.70903200  | 0.48794000  | -1.90898900 |
| H | 4.08275700  | 1.02962000  | -2.37732000 |
| O | 2.65524500  | -1.64166400 | 0.05038800  |
| O | 2.91413200  | 0.66117200  | -0.02089600 |
| B | 2.03558800  | -0.39756700 | 0.38044900  |
| H | 0.90243800  | -0.23913300 | -0.35152200 |
| C | 5.12675900  | 0.17308600  | 0.81191300  |
| H | 6.14328200  | -0.14857600 | 0.55900100  |
| H | 5.17139300  | 1.21128600  | 1.15628500  |
| H | 4.77254400  | -0.43990000 | 1.64522800  |

**IMA5-3**

|   | x          | y           | z           |
|---|------------|-------------|-------------|
| C | 4.73952800 | 1.36668200  | 0.11675100  |
| C | 3.34620800 | 1.29579300  | 0.08823500  |
| C | 2.63614200 | 0.08971100  | 0.03271200  |
| C | 3.41603700 | -1.07194300 | -0.00839700 |
| C | 4.81162300 | -1.06171100 | 0.01917600  |
| C | 5.46254000 | 0.17210000  | 0.08408700  |
| H | 5.23500800 | 2.33115300  | 0.16094900  |
| H | 5.36359700 | -1.99557200 | -0.01123000 |
| H | 6.54841700 | 0.20341900  | 0.10640300  |
| O | 2.77141600 | -2.29554600 | -0.08371900 |
| O | 2.62709100 | 2.48045400  | 0.11043500  |
| P | 1.09064900 | -2.18860200 | -0.09175600 |
| P | 0.96287900 | 2.25457700  | -0.00545000 |
| C | 0.70610000 | -3.05844300 | -1.73634300 |
| C | 0.71664500 | -3.23684600 | 1.44691100  |
| C | 0.61602800 | 3.11348800  | -1.65898600 |

|    |             |             |             |
|----|-------------|-------------|-------------|
| C  | 0.41467900  | 3.25835500  | 1.51272500  |
| H  | -1.85265400 | -0.54819100 | 3.82663800  |
| Ni | 0.72530100  | 0.03394300  | -0.01622000 |
| C  | 1.14624200  | -2.33555900 | 2.62972200  |
| H  | 0.54344400  | -1.42413500 | 2.67498200  |
| H  | 1.00204100  | -2.88976500 | 3.56617300  |
| H  | 2.20227300  | -2.05286000 | 2.56776300  |
| C  | 1.54476700  | -4.53667500 | 1.48046500  |
| H  | 1.41429200  | -5.00907200 | 2.46282000  |
| H  | 1.20968800  | -5.25806500 | 0.72911600  |
| H  | 2.61147600  | -4.34851100 | 1.33313600  |
| C  | -0.78296400 | -3.57185700 | 1.58027700  |
| H  | -0.97445000 | -3.90601300 | 2.60814200  |
| H  | -1.43615300 | -2.72156600 | 1.37732500  |
| H  | -1.07810200 | -4.38801700 | 0.91613400  |
| C  | 1.69728800  | -4.19654700 | -2.04837900 |
| H  | 1.61074100  | -5.02816400 | -1.34432500 |
| H  | 1.47483000  | -4.58846300 | -3.04954900 |
| H  | 2.73296800  | -3.84777600 | -2.04001800 |
| C  | -0.73927000 | -3.59292900 | -1.75112900 |
| H  | -1.02503800 | -3.81210800 | -2.78826400 |
| H  | -0.82764500 | -4.52592900 | -1.18730200 |
| H  | -1.45925200 | -2.87660400 | -1.34458400 |
| C  | 0.85678100  | -1.96292600 | -2.81763200 |
| H  | 0.13180200  | -1.15433900 | -2.67696400 |
| H  | 1.86252800  | -1.52858700 | -2.82157200 |
| H  | 0.68027700  | -2.40837900 | -3.80536200 |
| C  | 1.48765800  | 2.37952400  | -2.70355300 |
| H  | 2.55599300  | 2.49532300  | -2.49990800 |
| H  | 1.26044100  | 1.30910000  | -2.74229400 |
| H  | 1.28241900  | 2.80439700  | -3.69443400 |
| C  | -0.86628400 | 2.93678900  | -2.03735700 |
| H  | -1.03148800 | 3.37403900  | -3.03102400 |
| H  | -1.14981500 | 1.88180300  | -2.07676500 |
| H  | -1.54352600 | 3.42943400  | -1.33660900 |
| C  | 0.99409500  | 4.60588600  | -1.65553600 |
| H  | 0.91016400  | 4.99563300  | -2.67843300 |
| H  | 0.32465300  | 5.19933800  | -1.02607500 |
| H  | 2.02397900  | 4.76441700  | -1.32126400 |
| C  | 1.30377000  | 4.49915800  | 1.74147200  |
| H  | 0.99809700  | 4.96707400  | 2.68624200  |
| H  | 2.36065600  | 4.23342600  | 1.81987300  |
| H  | 1.19565600  | 5.24897500  | 0.95462200  |
| C  | -1.06334000 | 3.68164500  | 1.40860500  |
| H  | -1.37310600 | 4.09998300  | 2.37534300  |
| H  | -1.20627800 | 4.46696800  | 0.65822800  |
| H  | -1.73339400 | 2.85063000  | 1.17060100  |
| C  | 0.59817600  | 2.29928700  | 2.71172500  |
| H  | -0.05443700 | 1.42664600  | 2.63192600  |
| H  | 1.63514500  | 1.95585300  | 2.79973200  |
| H  | 0.34595300  | 2.83591800  | 3.63567100  |
| O  | -3.62706100 | -0.81916700 | 2.88449900  |
| C  | -2.44872400 | -0.54344600 | 2.89605000  |
| O  | -1.66781200 | -0.20941000 | 1.86960500  |
| C  | -4.09686100 | 0.76881400  | -0.46644800 |
| C  | -3.86999400 | -0.72925500 | -0.94014900 |
| C  | -4.39631100 | 1.75736100  | -1.59869000 |
| H  | -5.34642100 | 1.51371700  | -2.08872800 |

|   |             |             |             |
|---|-------------|-------------|-------------|
| H | -4.48553100 | 2.76705600  | -1.18350700 |
| H | -3.61023900 | 1.77263700  | -2.35645000 |
| C | -5.17632900 | 0.91985300  | 0.61733000  |
| H | -5.15671300 | 1.95153800  | 0.98611100  |
| H | -6.17769100 | 0.72364600  | 0.21702300  |
| H | -4.98790900 | 0.25444900  | 1.46109600  |
| C | -3.39865000 | -0.83454200 | -2.40020100 |
| H | -3.15056000 | -1.87642500 | -2.62426800 |
| H | -4.17572600 | -0.51519900 | -3.10316700 |
| H | -2.50364100 | -0.22890500 | -2.57561300 |
| O | -2.82316800 | 1.11469200  | 0.12368100  |
| O | -2.80102200 | -1.19193800 | -0.08868300 |
| B | -2.13240200 | -0.07595500 | 0.46343800  |
| H | -0.86820700 | 0.01983100  | -0.15247900 |
| C | -5.07111300 | -1.65362300 | -0.72293300 |
| H | -5.94269800 | -1.31355000 | -1.29477100 |
| H | -4.81990500 | -2.66541100 | -1.05995900 |
| H | -5.33766900 | -1.70659200 | 0.33431700  |

**TSA2-3**

|    | x           | y           | z           |
|----|-------------|-------------|-------------|
| C  | 4.42106800  | 1.06445200  | -1.56560600 |
| C  | 3.14895300  | 1.07769400  | -0.99108600 |
| C  | 2.46392500  | -0.07864700 | -0.59401400 |
| C  | 3.16149700  | -1.27911200 | -0.79226000 |
| C  | 4.43414300  | -1.35091200 | -1.36030500 |
| C  | 5.05715900  | -0.16392900 | -1.74779300 |
| H  | 4.89348200  | 1.99956800  | -1.84843700 |
| H  | 4.91406900  | -2.31592900 | -1.48693700 |
| H  | 6.04795300  | -0.19624600 | -2.19228500 |
| O  | 2.56182500  | -2.46380600 | -0.40117100 |
| O  | 2.54730300  | 2.30709800  | -0.79475700 |
| P  | 0.96677400  | -2.27630400 | 0.08534200  |
| P  | 1.07104900  | 2.23590800  | 0.00128500  |
| C  | 0.06743100  | -3.10752400 | -1.38386400 |
| C  | 1.00973000  | -3.36179900 | 1.64047500  |
| C  | 0.00362000  | 3.18906200  | -1.26288900 |
| C  | 1.50138800  | 3.27061500  | 1.53783600  |
| H  | -1.35009400 | 0.10589900  | 3.76162100  |
| Ni | 0.78122200  | -0.01455700 | 0.30835700  |
| C  | 1.98494900  | -2.64517900 | 2.60498200  |
| H  | 1.62954600  | -1.64577100 | 2.86934300  |
| H  | 2.06295500  | -3.23577600 | 3.52706200  |
| H  | 2.98781200  | -2.55952000 | 2.17557000  |
| C  | 1.54419800  | -4.77833600 | 1.35221500  |
| H  | 1.70097400  | -5.29702600 | 2.30721200  |
| H  | 0.83661600  | -5.37651100 | 0.77074000  |
| H  | 2.50120700  | -4.75280000 | 0.82303900  |
| C  | -0.38108800 | -3.45107200 | 2.30066200  |
| H  | -0.26949300 | -3.90556000 | 3.29360300  |
| H  | -0.84240700 | -2.47111500 | 2.43436100  |
| H  | -1.07607700 | -4.07178600 | 1.73134900  |
| C  | 0.94352200  | -4.20625700 | -2.02226500 |
| H  | 1.13998000  | -5.03839100 | -1.34206300 |
| H  | 0.40569100  | -4.60827900 | -2.89067300 |
| H  | 1.90374300  | -3.81595300 | -2.36750000 |
| C  | -1.29328800 | -3.69925300 | -0.97061400 |
| H  | -1.81294300 | -4.02817300 | -1.88073900 |

|   |             |             |             |
|---|-------------|-------------|-------------|
| H | -1.17726000 | -4.58261500 | -0.33461800 |
| H | -1.94126000 | -2.97114500 | -0.47300700 |
| C | -0.16089900 | -1.99497000 | -2.43188100 |
| H | -0.82191100 | -1.21341400 | -2.05061200 |
| H | 0.77922300  | -1.53109900 | -2.74895600 |
| H | -0.63194500 | -2.43807400 | -3.31894800 |
| C | -0.48841600 | 2.13611100  | -2.28153100 |
| H | 0.34328500  | 1.58056400  | -2.72940100 |
| H | -1.18382100 | 1.43179800  | -1.82063900 |
| H | -1.01765900 | 2.65401000  | -3.09225400 |
| C | -1.21233400 | 3.86315700  | -0.60005800 |
| H | -1.84237100 | 4.28764600  | -1.39277500 |
| H | -1.83360700 | 3.15398200  | -0.04643100 |
| H | -0.91519400 | 4.69009500  | 0.05265100  |
| C | 0.83714900  | 4.24592900  | -2.02045300 |
| H | 0.18651800  | 4.71295200  | -2.77099800 |
| H | 1.21171000  | 5.03983000  | -1.37036200 |
| H | 1.68906100  | 3.79970400  | -2.53840500 |
| C | 2.05447100  | 4.66132000  | 1.17125400  |
| H | 2.44816600  | 5.13405900  | 2.08067100  |
| H | 2.87072600  | 4.59908300  | 0.44569200  |
| H | 1.27888100  | 5.32187500  | 0.77238600  |
| C | 0.29319700  | 3.41950300  | 2.48383300  |
| H | 0.61312500  | 3.98425700  | 3.36948800  |
| H | -0.54006400 | 3.96191100  | 2.03173500  |
| H | -0.06643400 | 2.44756000  | 2.82340300  |
| C | 2.60260400  | 2.46734200  | 2.27004000  |
| H | 2.24673300  | 1.47611900  | 2.56621400  |
| H | 3.49905800  | 2.34776100  | 1.65435200  |
| H | 2.88899600  | 3.01184000  | 3.17923600  |
| O | 0.00223100  | 0.07557600  | 2.26884600  |
| C | -1.17674100 | 0.06612600  | 2.67366700  |
| O | -2.25223600 | 0.00997400  | 1.98733200  |
| C | -4.40201900 | 0.85201000  | -0.22590800 |
| C | -4.32458400 | -0.67032500 | -0.63965700 |
| C | -4.97508700 | 1.78396900  | -1.29688000 |
| H | -6.00964700 | 1.51613300  | -1.54323600 |
| H | -4.97518300 | 2.81483700  | -0.92547800 |
| H | -4.38027600 | 1.75733600  | -2.21316500 |
| C | -5.15371600 | 1.07815900  | 1.09867000  |
| H | -4.98535000 | 2.11060800  | 1.42378100  |
| H | -6.23349700 | 0.92667500  | 0.98640600  |
| H | -4.78408000 | 0.41440100  | 1.88391900  |
| C | -4.08438200 | -0.86415800 | -2.14723400 |
| H | -3.85160300 | -1.91723400 | -2.33719700 |
| H | -4.96429600 | -0.59699100 | -2.74365800 |
| H | -3.23677600 | -0.26338300 | -2.49165500 |
| O | -3.01574000 | 1.18283900  | -0.03203900 |
| O | -3.15969600 | -1.13456800 | 0.06175300  |
| B | -2.34343000 | -0.00533400 | 0.41127600  |
| H | -1.16499500 | -0.05266200 | -0.00145500 |
| C | -5.52486700 | -1.51596600 | -0.20342100 |
| H | -6.45300400 | -1.15972500 | -0.66708400 |
| H | -5.37308900 | -2.55637200 | -0.51184900 |
| H | -5.64861400 | -1.50372000 | 0.88202000  |

TSA3-3

x

y

z

|    |             |             |             |
|----|-------------|-------------|-------------|
| Ni | -0.66677000 | -0.08491400 | -0.08122100 |
| P  | -1.36685400 | 2.07923100  | 0.05641800  |
| P  | -0.54956500 | -2.36044300 | 0.05075600  |
| O  | 1.16293700  | 0.19382500  | -1.25771600 |
| C  | -2.51329300 | -0.42109600 | 0.21937900  |
| O  | -3.02350900 | 1.92086400  | 0.26538400  |
| C  | -0.92876900 | 3.03031600  | 1.64639400  |
| C  | -1.34707900 | 3.14266700  | -1.51494100 |
| O  | -2.16535500 | -2.79269700 | 0.19059600  |
| C  | 0.13806300  | -3.12642000 | 1.65874200  |
| C  | -0.10326400 | -3.33954200 | -1.50994300 |
| C  | 1.55065800  | 0.43981900  | -2.50448400 |
| C  | -3.45858100 | 0.60834000  | 0.33163700  |
| C  | -3.03329000 | -1.72141700 | 0.29263500  |
| C  | -1.97815000 | 4.10644700  | 1.99159400  |
| C  | 0.47212600  | 3.66513500  | 1.55037100  |
| C  | -0.93447100 | 1.97098200  | 2.77295000  |
| C  | 0.07669800  | 3.64021100  | -1.84152000 |
| C  | -2.31148000 | 4.34242500  | -1.42571000 |
| C  | -1.84221500 | 2.19561500  | -2.63527100 |
| C  | -0.05142800 | -2.05301200 | 2.75437700  |
| C  | -0.65401100 | -4.38554600 | 2.06921900  |
| C  | 1.63680000  | -3.46286200 | 1.53881200  |
| C  | -0.90925400 | -2.66523000 | -2.64631400 |
| C  | -0.52629600 | -4.81807100 | -1.40206600 |
| C  | 1.40294200  | -3.24753500 | -1.83246900 |
| O  | 0.85336500  | 0.25176200  | -3.47977300 |
| H  | 2.57034300  | 0.84769500  | -2.57001700 |
| C  | -4.82514500 | 0.38556500  | 0.50435000  |
| C  | -4.39020700 | -1.99982900 | 0.46332000  |
| H  | -1.74721500 | 4.50828900  | 2.98672700  |
| H  | -2.99051900 | 3.69506100  | 2.01842400  |
| H  | -1.96393300 | 4.94488100  | 1.29156200  |
| H  | 0.78055600  | 3.98491300  | 2.55448400  |
| H  | 0.46918000  | 4.55627400  | 0.91533900  |
| H  | 1.23088100  | 2.97510200  | 1.16894400  |
| H  | -1.90264900 | 1.46561400  | 2.85680600  |
| H  | -0.73605500 | 2.47334200  | 3.72859200  |
| H  | -0.16123700 | 1.21326500  | 2.62170400  |
| H  | 0.36377000  | 4.48922700  | -1.21509000 |
| H  | 0.10177100  | 3.97786000  | -2.88505000 |
| H  | 0.84114200  | 2.86946700  | -1.72125700 |
| H  | -3.31112200 | 4.04013600  | -1.10145900 |
| H  | -2.40078500 | 4.79211800  | -2.42301500 |
| H  | -1.94419700 | 5.12130200  | -0.75195700 |
| H  | -1.90112900 | 2.76634100  | -3.57091900 |
| H  | -2.84258500 | 1.80489600  | -2.42101100 |
| H  | -1.16323400 | 1.35607000  | -2.80357400 |
| H  | 0.25814800  | -2.47411200 | 3.71983500  |
| H  | -1.09676400 | -1.73879700 | 2.84717300  |
| H  | 0.55910400  | -1.16789000 | 2.55704200  |
| H  | -1.71813000 | -4.17458600 | 2.19889000  |
| H  | -0.25618800 | -4.74266800 | 3.02812400  |
| H  | -0.55460000 | -5.20082000 | 1.34869500  |
| H  | 2.01761500  | -3.70557400 | 2.53990000  |
| H  | 2.22654100  | -2.62801500 | 1.14799400  |
| H  | 1.80480000  | -4.34254800 | 0.90944400  |
| H  | -0.58326900 | -1.63714100 | -2.82759400 |

|   |             |             |             |
|---|-------------|-------------|-------------|
| H | -1.98482000 | -2.66947200 | -2.44167100 |
| H | -0.74382400 | -3.23271500 | -3.57124300 |
| H | -1.57809900 | -4.92406300 | -1.12099600 |
| H | 0.08722300  | -5.37224600 | -0.68522600 |
| H | -0.38972300 | -5.29354200 | -2.38206900 |
| H | 1.55859300  | -3.59354400 | -2.86210700 |
| H | 2.00357300  | -3.88242500 | -1.17671500 |
| H | 1.78846900  | -2.22997100 | -1.75463200 |
| H | -5.50296000 | 1.22941000  | 0.58170000  |
| C | -5.28153000 | -0.93152200 | 0.56853100  |
| H | -4.72635600 | -3.03057500 | 0.50904000  |
| H | -6.34185600 | -1.12714300 | 0.70142500  |
| C | 4.06534700  | 1.38711900  | 0.53568700  |
| C | 4.31411100  | -0.14875900 | 0.24778400  |
| C | 3.98257500  | 1.70134400  | 2.04033100  |
| H | 4.95314200  | 1.59576300  | 2.53746100  |
| H | 3.64574000  | 2.73511700  | 2.16987800  |
| H | 3.26375400  | 1.04625200  | 2.54256600  |
| C | 5.06492600  | 2.33769100  | -0.12752800 |
| H | 4.80077800  | 3.37388200  | 0.11029700  |
| H | 6.08418300  | 2.15767100  | 0.23450600  |
| H | 5.05859200  | 2.23249700  | -1.21524700 |
| C | 5.11768500  | -0.88008000 | 1.32912000  |
| H | 5.23623100  | -1.93318500 | 1.05080400  |
| H | 6.11977400  | -0.44872200 | 1.44105700  |
| H | 4.61200200  | -0.84463600 | 2.29688100  |
| O | 2.77023200  | 1.61140500  | -0.04376400 |
| O | 2.98076000  | -0.68460800 | 0.23119900  |
| B | 2.03352200  | 0.37756100  | 0.01822500  |
| H | 1.09338300  | 0.33577000  | 0.85738400  |
| C | 4.97112800  | -0.41755500 | -1.11757900 |
| H | 6.02800200  | -0.12776100 | -1.12667300 |
| H | 4.90928800  | -1.48952100 | -1.33269700 |
| H | 4.46791300  | 0.11581400  | -1.92883900 |

### TSA4-3

|    | x           | y           | z           |
|----|-------------|-------------|-------------|
| C  | 4.73582100  | 1.53261500  | 0.10218100  |
| C  | 3.34596700  | 1.40782100  | 0.07620500  |
| C  | 2.68209300  | 0.17728100  | 0.01382600  |
| C  | 3.50386700  | -0.95326600 | -0.03220200 |
| C  | 4.89852000  | -0.89305300 | -0.00796900 |
| C  | 5.50248300  | 0.36498900  | 0.06087800  |
| H  | 5.19679100  | 2.51398300  | 0.15114900  |
| H  | 5.48663500  | -1.80459700 | -0.04293400 |
| H  | 6.58665800  | 0.43681100  | 0.08054300  |
| O  | 2.89711900  | -2.19819400 | -0.10686700 |
| O  | 2.57568000  | 2.56230500  | 0.10907800  |
| P  | 1.20972500  | -2.13690500 | -0.08508900 |
| P  | 0.92076800  | 2.25619000  | -0.01238000 |
| C  | 0.83719600  | -3.06766300 | -1.70049400 |
| C  | 0.90331700  | -3.16900400 | 1.48194000  |
| C  | 0.54478500  | 3.13231100  | -1.65103100 |
| C  | 0.32570900  | 3.21975900  | 1.51433400  |
| H  | -1.98587300 | -0.58546200 | 3.90002400  |
| Ni | 0.76239700  | 0.05107400  | -0.03813600 |
| C  | 1.33313000  | -2.23471200 | 2.63840200  |
| H  | 0.70972300  | -1.33600600 | 2.67660100  |



|   |             |             |             |
|---|-------------|-------------|-------------|
| H | 1.21965600  | -2.77187700 | 3.58918300  |
| H | 2.37975000  | -1.92664000 | 2.54994800  |
| C | 1.76200800  | -4.44818700 | 1.52316700  |
| H | 1.67424400  | -4.89928000 | 2.52035100  |
| H | 1.42094000  | -5.19587300 | 0.80043700  |
| H | 2.81865600  | -4.23890600 | 1.33687700  |
| C | -0.58259800 | -3.53441600 | 1.66262400  |
| H | -0.72859900 | -3.90310100 | 2.68659100  |
| H | -1.24620000 | -2.68100800 | 1.51644400  |
| H | -0.89722700 | -4.33144400 | 0.98493600  |
| C | 1.86311500  | -4.17716400 | -2.00080600 |
| H | 1.81863500  | -4.99179700 | -1.27359100 |
| H | 1.64064800  | -4.60356800 | -2.98796400 |
| H | 2.88478500  | -3.79007800 | -2.01743700 |
| C | -0.58730200 | -3.65487100 | -1.68315800 |
| H | -0.88085400 | -3.90876000 | -2.71034500 |
| H | -0.63527100 | -4.57740000 | -1.09695800 |
| H | -1.32741900 | -2.95597700 | -1.28268500 |
| C | 0.93402200  | -1.99355400 | -2.80878200 |
| H | 0.18875500  | -1.20368900 | -2.66971800 |
| H | 1.92576000  | -1.52904400 | -2.83853000 |
| H | 0.75522900  | -2.46541600 | -3.78399200 |
| C | 1.44713200  | 2.45068100  | -2.70517700 |
| H | 2.50907600  | 2.60852600  | -2.49684900 |
| H | 1.26589100  | 1.37203800  | -2.75768400 |
| H | 1.22568100  | 2.87995200  | -3.69085300 |
| C | -0.92724300 | 2.89799800  | -2.03712100 |
| H | -1.10955900 | 3.33233000  | -3.02918200 |
| H | -1.15909100 | 1.83035300  | -2.08212500 |
| H | -1.62669500 | 3.35967400  | -1.33628200 |
| C | 0.86100600  | 4.63855700  | -1.62607700 |
| H | 0.76105100  | 5.04087300  | -2.64284300 |
| H | 0.16955300  | 5.19603200  | -0.98722700 |
| H | 1.88402400  | 4.83225100  | -1.28935300 |
| C | 1.16865900  | 4.48493800  | 1.78001700  |
| H | 0.83211100  | 4.92852800  | 2.72620000  |
| H | 2.23203700  | 4.25167300  | 1.87169900  |
| H | 1.05032000  | 5.24260200  | 1.00196400  |
| C | -1.16341000 | 3.59797500  | 1.40003900  |
| H | -1.49910100 | 3.99228800  | 2.36836000  |
| H | -1.32442200 | 4.38811800  | 0.65865000  |
| H | -1.80403000 | 2.74959000  | 1.14474500  |
| C | 0.52191700  | 2.24586500  | 2.69918100  |
| H | -0.09927700 | 1.35291800  | 2.59193100  |
| H | 1.56776700  | 1.93372900  | 2.79603300  |
| H | 0.23769700  | 2.75483100  | 3.62975600  |
| O | -3.80817600 | -0.70797000 | 3.00882500  |
| C | -2.61101400 | -0.54985900 | 2.99276600  |
| O | -1.83653700 | -0.31667400 | 1.92396000  |
| C | -4.23140300 | 0.62040100  | -0.53007500 |
| C | -3.88330100 | -0.84355100 | -1.02761500 |
| C | -4.44064200 | 1.64575600  | -1.64507600 |
| H | -5.31793000 | 1.38608200  | -2.24919700 |
| H | -4.61943400 | 2.63145200  | -1.20284300 |
| H | -3.57508400 | 1.72236200  | -2.30533000 |
| C | -5.42098600 | 0.67268700  | 0.44029100  |
| H | -5.49243100 | 1.68524500  | 0.85145700  |
| H | -6.36367400 | 0.44493500  | -0.06960500 |

|   |             |             |             |
|---|-------------|-------------|-------------|
| H | -5.28274100 | -0.01695500 | 1.27523100  |
| C | -3.19732700 | -0.87056800 | -2.40059300 |
| H | -2.88063500 | -1.89288400 | -2.62617000 |
| H | -3.87926900 | -0.54677100 | -3.19399300 |
| H | -2.31044300 | -0.23081500 | -2.41831800 |
| O | -3.04654900 | 0.98576400  | 0.23111800  |
| O | -2.92925800 | -1.30361600 | -0.03388800 |
| B | -2.40602400 | -0.18946500 | 0.60300200  |
| H | -0.80004800 | -0.01517600 | -0.12735600 |
| C | -5.06312700 | -1.81662600 | -1.02272300 |
| H | -5.84929700 | -1.48272200 | -1.70991700 |
| H | -4.72461200 | -2.80491600 | -1.35136400 |
| H | -5.48986700 | -1.92079300 | -0.02316300 |

**TSA5-3**

|    | x           | y           | z           |
|----|-------------|-------------|-------------|
| Ni | -0.74181700 | 0.08000800  | -0.09822700 |
| P  | -1.40407200 | -2.03753800 | -0.16709800 |
| P  | -0.69343400 | 2.30048700  | 0.01649300  |
| O  | 1.97735400  | -0.47333200 | 1.92682300  |
| C  | -2.64214600 | 0.39270500  | -0.18774100 |
| O  | -3.08808000 | -1.95329800 | -0.20980900 |
| C  | -1.10752200 | -3.00387600 | -1.77128900 |
| C  | -1.17329100 | -3.06643800 | 1.40846600  |
| O  | -2.30692000 | 2.75624600  | -0.18496600 |
| C  | 0.07065700  | 3.25981900  | -1.43805400 |
| C  | -0.36258100 | 3.10737000  | 1.70463600  |
| C  | 2.44964500  | -1.37531300 | 2.80816300  |
| C  | -3.57048100 | -0.65268400 | -0.24188200 |
| C  | -3.18193700 | 1.68265400  | -0.23135300 |
| C  | -1.95361100 | -4.28621400 | -1.87176900 |
| C  | 0.38683600  | -3.33409700 | -1.93361000 |
| C  | -1.52888500 | -2.03050200 | -2.89724900 |
| C  | 0.22087900  | -3.72353700 | 1.43607600  |
| C  | -2.26419200 | -4.14012600 | 1.59357100  |
| C  | -1.29038500 | -2.04386300 | 2.56386200  |
| C  | -0.02789300 | 2.30352900  | -2.64871600 |
| C  | -0.70286400 | 4.55183100  | -1.77162700 |
| C  | 1.55018900  | 3.58794300  | -1.16835800 |
| C  | -1.32902600 | 2.40641600  | 2.68846600  |
| C  | -0.66591100 | 4.61752000  | 1.69611000  |
| C  | 1.08100800  | 2.85431900  | 2.17917700  |
| O  | 2.00905300  | -1.49064300 | 3.92345700  |
| H  | 3.26995200  | -1.99335500 | 2.40735900  |
| C  | -4.94964100 | -0.45657200 | -0.33029600 |
| C  | -4.55081200 | 1.94308500  | -0.31794500 |
| H  | -1.86788700 | -4.69247800 | -2.88842500 |
| H  | -3.01169900 | -4.09239400 | -1.67366200 |
| H  | -1.60515800 | -5.06164700 | -1.18301000 |
| H  | 0.57108300  | -3.66364900 | -2.96484400 |
| H  | 0.70763000  | -4.14048700 | -1.26935000 |
| H  | 1.01737800  | -2.46476300 | -1.73593700 |
| H  | -2.58434900 | -1.75179800 | -2.82293400 |
| H  | -1.37489100 | -2.52033800 | -3.86751800 |
| H  | -0.93102700 | -1.11283300 | -2.88131100 |
| H  | 0.26177200  | -4.61214800 | 0.79769000  |
| H  | 0.44644400  | -4.04322900 | 2.46078100  |
| H  | 1.01509100  | -3.04168200 | 1.11911500  |

|   |             |             |             |
|---|-------------|-------------|-------------|
| H | -3.26625700 | -3.70475100 | 1.56965900  |
| H | -2.12079600 | -4.61577100 | 2.57250100  |
| H | -2.21400000 | -4.92648500 | 0.83615000  |
| H | -1.19699900 | -2.57283100 | 3.52052500  |
| H | -2.26108100 | -1.53585400 | 2.55287600  |
| H | -0.50079300 | -1.28905800 | 2.52399000  |
| H | 0.37107000  | 2.80607400  | -3.54000300 |
| H | -1.06546100 | 2.02161500  | -2.85992500 |
| H | 0.54748300  | 1.38678300  | -2.48387600 |
| H | -1.75415000 | 4.34994000  | -1.98911500 |
| H | -0.24885300 | 5.00806900  | -2.66140100 |
| H | -0.65821300 | 5.28772900  | -0.96500700 |
| H | 2.01099100  | 3.94302200  | -2.09997000 |
| H | 2.11198000  | 2.71719500  | -0.82097200 |
| H | 1.65871000  | 4.38748500  | -0.42865400 |
| H | -1.14403700 | 1.32864700  | 2.73984700  |
| H | -2.37758700 | 2.56578300  | 2.42088800  |
| H | -1.16831800 | 2.82121900  | 3.69178600  |
| H | -1.66660900 | 4.83150200  | 1.30890600  |
| H | 0.06638200  | 5.18128300  | 1.11000900  |
| H | -0.61625800 | 4.99379500  | 2.72628300  |
| H | 1.19313100  | 3.27960400  | 3.18560400  |
| H | 1.82845000  | 3.32642300  | 1.53757900  |
| H | 1.30980300  | 1.78872700  | 2.24100900  |
| H | -5.62200000 | -1.30766300 | -0.36941300 |
| C | -5.42696200 | 0.85600400  | -0.36710800 |
| H | -4.91190400 | 2.96624500  | -0.34439600 |
| H | -6.49684900 | 1.03404500  | -0.43502900 |
| C | 4.01284800  | -1.02082600 | -0.99205800 |
| C | 4.32877700  | 0.44306200  | -0.49183800 |
| C | 3.34571800  | -1.05106400 | -2.37250000 |
| H | 4.03744900  | -0.72175100 | -3.15491500 |
| H | 3.04098800  | -2.07536400 | -2.60397400 |
| H | 2.45620700  | -0.41483400 | -2.39962000 |
| C | 5.20362700  | -1.97994100 | -0.97440700 |
| H | 4.87959300  | -2.97326900 | -1.30153700 |
| H | 5.98952400  | -1.63875700 | -1.65815900 |
| H | 5.63144200  | -2.07851400 | 0.02601600  |
| C | 4.62530500  | 1.45202200  | -1.60053900 |
| H | 4.80385600  | 2.43930900  | -1.16225400 |
| H | 5.52575200  | 1.16313100  | -2.15523400 |
| H | 3.79613300  | 1.53934400  | -2.30541600 |
| O | 3.05177800  | -1.48284400 | -0.00355600 |
| O | 3.09878700  | 0.81691300  | 0.18312000  |
| B | 2.49220000  | -0.36568300 | 0.60505400  |
| H | 0.80947800  | -0.17991700 | -0.10355600 |
| C | 5.44765400  | 0.49767600  | 0.56140200  |
| H | 6.43058000  | 0.29609100  | 0.12218300  |
| H | 5.46618100  | 1.49833600  | 1.00402300  |
| H | 5.27731600  | -0.22158300 | 1.36870000  |

**TSA6-3**

|   | x           | y           | z           |
|---|-------------|-------------|-------------|
| H | -3.48082400 | 0.64954700  | -1.22555200 |
| O | -3.86011600 | 0.16729800  | 0.71201500  |
| C | -3.23541700 | 0.09493500  | -0.30556400 |
| O | -2.17832600 | -0.75066600 | -0.49369600 |
| C | 1.35321000  | -0.68584300 | 0.05569300  |

|   |             |             |             |
|---|-------------|-------------|-------------|
| C | 0.99065600  | 0.85415600  | 0.02574100  |
| C | 2.53476000  | -1.09284700 | -0.82100500 |
| H | 3.45745600  | -0.60972000 | -0.48009400 |
| H | 2.67807100  | -2.17622900 | -0.76026200 |
| H | 2.37044800  | -0.83373300 | -1.86932000 |
| C | 1.52852600  | -1.24071100 | 1.47516300  |
| H | 1.57135600  | -2.33289500 | 1.42546500  |
| H | 2.45266100  | -0.87954900 | 1.93816400  |
| H | 0.68727300  | -0.96531600 | 2.11923800  |
| C | 1.30958100  | 1.52859300  | -1.31446800 |
| H | 0.84704300  | 2.52019600  | -1.33160500 |
| H | 2.38809200  | 1.64986300  | -1.45830200 |
| H | 0.91106700  | 0.95354400  | -2.15653700 |
| O | 0.14684000  | -1.30152300 | -0.48772000 |
| O | -0.46490600 | 0.83077300  | 0.14500900  |
| B | -0.86563600 | -0.40969400 | -0.27682200 |
| C | 1.55392300  | 1.67789600  | 1.18063600  |
| H | 2.64969900  | 1.66430100  | 1.16975400  |
| H | 1.22760700  | 2.71821600  | 1.08338200  |
| H | 1.20885900  | 1.30612400  | 2.14774000  |

**TSB1-3**

|    | x           | y           | z           |
|----|-------------|-------------|-------------|
| C  | 4.91769700  | -0.52813700 | -1.28104000 |
| C  | 3.62951000  | -0.71926100 | -0.78093100 |
| C  | 2.75256800  | 0.33337700  | -0.48791100 |
| C  | 3.22406600  | 1.61861600  | -0.78367700 |
| C  | 4.50423400  | 1.86651800  | -1.28250400 |
| C  | 5.34664500  | 0.77906700  | -1.52178800 |
| H  | 5.55538700  | -1.38334100 | -1.48026100 |
| H  | 4.81914300  | 2.88551400  | -1.48313900 |
| H  | 6.34652100  | 0.95153500  | -1.91038000 |
| O  | 2.37730600  | 2.69649500  | -0.59076100 |
| O  | 3.18970900  | -2.02090000 | -0.57798400 |
| P  | 0.85832100  | 2.28481100  | 0.00943700  |
| P  | 1.61875700  | -2.10605600 | 0.00996200  |
| C  | 0.89158600  | 3.26559700  | 1.63505300  |
| C  | -0.24183800 | 3.05697200  | -1.33678100 |
| C  | 1.95564600  | -3.00613200 | 1.64946200  |
| C  | 0.80807400  | -3.15899900 | -1.34312200 |
| C  | -1.04955900 | -0.41397000 | 1.43014800  |
| O  | -0.21707000 | -0.13287800 | 2.34862600  |
| O  | -2.22554100 | 0.45861300  | 1.35826800  |
| H  | -0.63683800 | -0.23975700 | 0.22344000  |
| Ni | 0.97767300  | 0.03392500  | 0.11823600  |
| C  | -5.40954600 | 0.20352600  | -0.24362100 |
| C  | -4.85958200 | -1.27348700 | -0.36245600 |
| C  | -5.26933000 | 1.00810800  | -1.54413400 |
| H  | -5.97146200 | 0.66663000  | -2.31235400 |
| H  | -5.47650200 | 2.06155800  | -1.33157500 |
| H  | -4.25370300 | 0.93914600  | -1.94737200 |
| C  | -6.83572400 | 0.32201800  | 0.29276600  |
| H  | -7.11316700 | 1.37873700  | 0.36301800  |
| H  | -7.54924700 | -0.17211700 | -0.37695300 |
| H  | -6.92970800 | -0.11549900 | 1.28930900  |
| C  | -4.97278500 | -1.90135100 | -1.75029000 |
| H  | -4.53760800 | -2.90613300 | -1.73566000 |
| H  | -6.02191900 | -1.99258900 | -2.05436400 |

|   |             |             |             |
|---|-------------|-------------|-------------|
| H | -4.44113600 | -1.31483100 | -2.50320500 |
| O | -4.50518700 | 0.79772900  | 0.72161800  |
| O | -3.45063400 | -1.10250100 | -0.04699100 |
| B | -3.34341200 | 0.05624900  | 0.70627600  |
| C | -5.44016600 | -2.22179400 | 0.69572600  |
| H | -6.49100300 | -2.45732000 | 0.49672200  |
| H | -4.87024500 | -3.15631900 | 0.68679800  |
| H | -5.36554100 | -1.79019000 | 1.69893800  |
| H | -1.41448900 | -1.45390300 | 1.33436600  |
| C | 2.01134700  | 2.60214700  | 2.47224700  |
| H | 1.77168400  | 1.55724700  | 2.68678600  |
| H | 2.98655300  | 2.65529900  | 1.97795300  |
| H | 2.08993100  | 3.13673400  | 3.42767900  |
| C | -0.43322900 | 3.13974200  | 2.41221900  |
| H | -0.68879000 | 2.09451700  | 2.59608300  |
| H | -0.30546300 | 3.64046100  | 3.38160800  |
| H | -1.26920000 | 3.62606600  | 1.90301500  |
| C | 1.23937100  | 4.74918300  | 1.40364400  |
| H | 0.41218700  | 5.29962500  | 0.94439500  |
| H | 1.43513800  | 5.21559300  | 2.37783100  |
| H | 2.13348900  | 4.87483200  | 0.78555100  |
| C | 0.65049100  | -3.37492700 | 2.38046100  |
| H | 0.91311100  | -3.85116100 | 3.33432000  |
| H | 0.06386400  | -2.48136400 | 2.60790400  |
| H | 0.03985800  | -4.09087000 | 1.82102600  |
| C | 2.72007600  | -1.97079700 | 2.50984000  |
| H | 3.66223100  | -1.66617300 | 2.04329100  |
| H | 2.10576200  | -1.08617600 | 2.69663900  |
| H | 2.95893700  | -2.43344700 | 3.47626600  |
| C | 2.83902900  | -4.25604700 | 1.46435100  |
| H | 3.18575600  | -4.58248000 | 2.45328900  |
| H | 2.29142900  | -5.09211500 | 1.02170700  |
| H | 3.72130800  | -4.05097400 | 0.85152500  |
| C | -0.66500900 | -3.44956300 | -0.99355900 |
| H | -1.13552800 | -3.95188200 | -1.84914600 |
| H | -0.76362100 | -4.11778000 | -0.13281800 |
| H | -1.24114100 | -2.54109400 | -0.79087000 |
| C | 1.55547600  | -4.47523900 | -1.63174400 |
| H | 1.41626400  | -5.21243800 | -0.83706900 |
| H | 1.15545100  | -4.91325500 | -2.55553600 |
| H | 2.62797900  | -4.31312100 | -1.77477100 |
| C | 0.85594400  | -2.27684200 | -2.61312900 |
| H | 0.32554300  | -1.33007900 | -2.47045200 |
| H | 1.88391900  | -2.05208800 | -2.91349700 |
| H | 0.37268900  | -2.81723400 | -3.43717900 |
| C | 0.35965100  | 4.35195400  | -1.92024000 |
| H | -0.27974600 | 4.69259100  | -2.74528300 |
| H | 0.40718200  | 5.15909700  | -1.18589400 |
| H | 1.36604400  | 4.18865100  | -2.31367200 |
| C | -0.31171500 | 2.00227000  | -2.46514600 |
| H | 0.68323600  | 1.73977200  | -2.84106400 |
| H | -0.80215100 | 1.08262800  | -2.12975600 |
| H | -0.88975000 | 2.41233600  | -3.30367000 |
| C | -1.66383700 | 3.32788000  | -0.80837200 |
| H | -1.69099600 | 4.19630000  | -0.14370200 |
| H | -2.32158600 | 3.54755500  | -1.65953300 |
| H | -2.08722800 | 2.47581700  | -0.26831400 |

**[Ni]OCH<sub>2</sub>OBPin**

|    | x           | y           | z           |
|----|-------------|-------------|-------------|
| C  | 5.27932400  | 0.89854700  | 0.37030100  |
| C  | 4.04320000  | 0.27257800  | 0.20719800  |
| C  | 2.82616000  | 0.96470200  | 0.14355900  |
| C  | 2.91648700  | 2.35684400  | 0.27124900  |
| C  | 4.12413100  | 3.03736000  | 0.43727300  |
| C  | 5.30375600  | 2.29094600  | 0.48278300  |
| H  | 6.18913200  | 0.30825200  | 0.41189500  |
| H  | 4.13165000  | 4.11875400  | 0.52950300  |
| H  | 6.25491000  | 2.80064300  | 0.61091700  |
| O  | 1.74635700  | 3.10066700  | 0.23257700  |
| O  | 4.02081400  | -1.11703500 | 0.10820000  |
| P  | 0.35580000  | 2.17363200  | 0.00805000  |
| P  | 2.46322800  | -1.73505900 | -0.02993900 |
| C  | -0.62666600 | 2.63476100  | 1.55829200  |
| C  | -0.31040000 | 2.99325100  | -1.57874600 |
| C  | 2.34801100  | -2.82363000 | 1.51542200  |
| C  | 2.64903900  | -2.71941400 | -1.64396700 |
| C  | -1.26144900 | -1.29305100 | -0.97690500 |
| O  | -0.45710000 | -0.93131300 | 0.04552900  |
| O  | -2.38608700 | -0.36999900 | -1.15958400 |
| H  | -0.76966400 | -1.28734500 | -1.96401600 |
| Ni | 1.15202700  | 0.06714100  | -0.03373400 |
| C  | -5.81820200 | -0.33918300 | -0.20195000 |
| C  | -5.28066100 | -1.61466000 | 0.56252800  |
| C  | -6.56779900 | -0.68418000 | -1.49731100 |
| H  | -7.54494400 | -1.13629200 | -1.29580700 |
| H  | -6.72397700 | 0.23511800  | -2.07051300 |
| H  | -5.98760900 | -1.37426400 | -2.11844400 |
| C  | -6.65101400 | 0.62123000  | 0.64550800  |
| H  | -6.94799200 | 1.48326000  | 0.03897000  |
| H  | -7.56260700 | 0.13315300  | 1.00947600  |
| H  | -6.08658100 | 0.99239300  | 1.50398400  |
| C  | -6.12935200 | -2.87507400 | 0.40070200  |
| H  | -5.66286300 | -3.70418600 | 0.94301700  |
| H  | -7.13522800 | -2.72599000 | 0.81036200  |
| H  | -6.21956300 | -3.16809700 | -0.64789600 |
| O  | -4.59208400 | 0.33009700  | -0.58803100 |
| O  | -3.99841500 | -1.83874100 | -0.07717600 |
| B  | -3.59882100 | -0.63216100 | -0.62192400 |
| C  | -5.00030700 | -1.35564200 | 2.04972400  |
| H  | -5.92546400 | -1.24096900 | 2.62486400  |
| H  | -4.44328300 | -2.20492500 | 2.45773700  |
| H  | -4.39135600 | -0.45648800 | 2.18729800  |
| H  | -1.69965500 | -2.28902900 | -0.80214200 |
| C  | 0.26769600  | 2.21712400  | 2.74869500  |
| H  | 0.49590900  | 1.14615000  | 2.72460600  |
| H  | 1.21069000  | 2.77142200  | 2.76791100  |
| H  | -0.26865100 | 2.42516400  | 3.68351300  |
| C  | -1.92742200 | 1.80643700  | 1.60930900  |
| H  | -1.71928900 | 0.73721200  | 1.50740300  |
| H  | -2.41235600 | 1.97861200  | 2.58003300  |
| H  | -2.64050300 | 2.08315000  | 0.82907900  |
| C  | -0.92558000 | 4.14107300  | 1.66744300  |
| H  | -1.62943900 | 4.48098000  | 0.90224000  |
| H  | -1.38326900 | 4.34474900  | 2.64468600  |
| H  | -0.01276100 | 4.74126900  | 1.59466600  |

|   |             |             |             |
|---|-------------|-------------|-------------|
| C | 0.94001900  | -3.45014900 | 1.61066300  |
| H | 0.82439600  | -3.90624500 | 2.60279100  |
| H | 0.15576000  | -2.69977800 | 1.47121100  |
| H | 0.78990200  | -4.24116900 | 0.87009200  |
| C | 2.53911100  | -1.85274500 | 2.70424000  |
| H | 3.52221800  | -1.37261500 | 2.68803100  |
| H | 1.77312400  | -1.07046500 | 2.71420600  |
| H | 2.45320200  | -2.42041800 | 3.63959600  |
| C | 3.43478700  | -3.91213000 | 1.58254900  |
| H | 3.40508100  | -4.38580500 | 2.57271900  |
| H | 3.27385400  | -4.70191600 | 0.84215100  |
| H | 4.43758700  | -3.49683900 | 1.43951800  |
| C | 1.53092300  | -3.76819300 | -1.79616600 |
| H | 1.56487800  | -4.17936600 | -2.81340700 |
| H | 1.65858200  | -4.60430600 | -1.10219300 |
| H | 0.53420900  | -3.34374900 | -1.64292700 |
| C | 4.02851700  | -3.39827100 | -1.76928600 |
| H | 4.16696500  | -4.20544300 | -1.04580400 |
| H | 4.11311700  | -3.83709900 | -2.77226800 |
| H | 4.84266800  | -2.68047000 | -1.64189300 |
| C | 2.51793200  | -1.66648000 | -2.76929600 |
| H | 1.53023000  | -1.19414400 | -2.77199000 |
| H | 3.27147200  | -0.87735200 | -2.67631100 |
| H | 2.66245800  | -2.15757000 | -3.74048200 |
| C | 0.08595200  | 4.48202600  | -1.66200900 |
| H | -0.26545600 | 4.87911300  | -2.62352900 |
| H | -0.37212700 | 5.08061700  | -0.87044000 |
| H | 1.16829400  | 4.61985400  | -1.60856200 |
| C | 0.37212200  | 2.23388600  | -2.73962800 |
| H | 1.46480800  | 2.28095900  | -2.67331400 |
| H | 0.07321400  | 1.18098800  | -2.76068600 |
| H | 0.07363200  | 2.68987100  | -3.69267800 |
| C | -1.83772000 | 2.84924700  | -1.71179400 |
| H | -2.37296300 | 3.46357400  | -0.98093300 |
| H | -2.13407400 | 3.20293400  | -2.70848700 |
| H | -2.16976200 | 1.81373000  | -1.60962100 |
